# Supplementary material
Source: PubMed Central journal article supplement (PMC2650485)
Supplement: NIHMS86523-supplement-2_si_002.pdf [file NIHMS86523-supplement-2_si_002.pdf]

## Supplementary Information for

### Total Synthesis of (±)-Calcaridine A and (±)-*epi*-Calcaridine A

Panduka B. Koswatta, Rasapalli Sivappa, H.V. Rasika Dias and Carl J. Lovely\*

Department of Chemistry and Biochemistry, The University of Texas at Arlington, Arlington,

Texas 76019

1. Experimental procedures and characterization data for **6, 7, 10-14, 16-23, *epi*-24, 24, *epi*-calcaridine (*epi*-1), calcaridine (1)** – S2-S14.
2. Figures and experimental for X-ray structure determination – S15-S19
3. Copies of <sup>1</sup>H and <sup>13</sup>C NMR spectra for – **6, 7, 10-14, 16-23, *epi*-24, 24, *epi*-calcaridine (*epi*-1), calcaridine (1)** S20-S57.

**5-(4-Benzoyloxy)-phenyl-(4-iodo-1-methyl-1H-imidazol-5-yl)-methanol (10):** EtMgBr (3.0 M

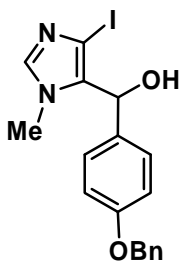

solution in ether, 2.31 ml, 6.93 mmol) was added to a solution of 4,5-diiodo-1-methyl-1H-imidazole (2.20 g, 6.60 mmol) in dry CH<sub>2</sub>Cl<sub>2</sub> (15 ml) at rt over ~5 min. The resulting mixture was stirred at rt for 20 min and 4-benzoyloxybenzaldehyde (1.54 g, 7.25 mmol) in dry CH<sub>2</sub>Cl<sub>2</sub> (25 ml) was added and stirred at rt overnight. Sat. NH<sub>4</sub>Cl (10 ml) was added to the

reaction and the resulting pale yellow solid was filtered and the filtrate was partitioned with CH<sub>2</sub>Cl<sub>2</sub>. The organic layer was dried (Na<sub>2</sub>SO<sub>4</sub>) and concentrated to give a pale yellow solid. The resulting solid was triturated with hexanes, which was decanted to give **10** (2.80 g, quant) as a white solid; m.p. 195-198 °C; <sup>1</sup>H NMR (DMSO-d<sub>6</sub>): δ = 7.58 (s, 1H), 7.43 (d, *J* = 7.3 Hz, 2H), 7.38 (t, *J* = 7.3 Hz, 2 H), 7.32 (t, *J* = 7.3 Hz, 1H), 7.17 (d, *J* = 8.7 Hz, 2H), 6.99 (d, *J* = 8.7 Hz, 2H), 6.22 (d, *J* = 4.1 Hz, 1H), 5.80 (d, *J* = 4.1 Hz, 1H), 5.07 (s, 2H), 3.38 (s, 3H); <sup>13</sup>C NMR: δ = 157.9, 141.9, 137.6, 135.4, 134.6, 129.0, 128.4, 128.3, 127.0, 115.1, 85.7, 70.0, 66.5, 33.2; IR (KBr, cm<sup>-1</sup>): 3189 (br), 3034, 2948, 2874, 1607, 1506, 1387, 1236, 1166, 1006, 971, 744, 699; HR-ESIMS (*m/z*): Calcd. for C<sub>18</sub>H<sub>18</sub>IN<sub>2</sub>O<sub>2</sub> [M+H]<sup>+</sup> 421.0408, found 421.0392; Calcd. for C<sub>18</sub>H<sub>17</sub>IN<sub>2</sub>O<sub>2</sub>Na [M+Na]<sup>+</sup> 443.0227, found 443.0194.

**5-(4-Benzoyloxy)-benzyl-4-iodo-1-methyl-1H-imidazole (7):** Et<sub>3</sub>SiH (5.36 ml, 33.55 mmol)

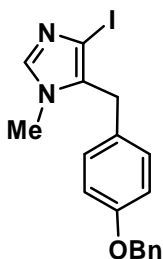

and TFA (2.58 ml, 33.55 mmol) were added to a solution of **10** (2.82 g, 6.71 mmol) in anhydrous CHCl<sub>3</sub> (50 ml) at rt, then the resulting mixture was heated at 55-60 °C for 24 h under nitrogen atmosphere. After cooling to rt, the reaction was quenched by the addition of sat. aq. NaHCO<sub>3</sub> solution. The resulting mixture was extracted with CHCl<sub>3</sub> several times and the combined

extracts were dried (Na<sub>2</sub>SO<sub>4</sub>) and concentrated. The residue was purified by chromatography

(hexane/EtOAc, 1:1) to give **7** as a thick colorless oil (1.61 g, 60%);  $^1\text{H}$  NMR ( $\text{CDCl}_3$ ):  $\delta = 7.42$ - $7.30$  (m, 6H),  $7.03$  (d,  $J = 8.7$  Hz, 2H),  $6.89$  (d,  $J = 8.7$  Hz, 2 H),  $5.02$  (s, 2H),  $3.91$  (s, 2H),  $3.41$  (s, 3H);  $^{13}\text{C}$  NMR:  $\delta = 157.8$ ,  $139.4$ ,  $137.0$ ,  $133.4$ ,  $129.6$ ,  $129.1$ ,  $128.7$ ,  $128.1$ ,  $1127.5$ ,  $115.2$ ,  $84.8$ ,  $70.2$ ,  $32.6$ ,  $30.0$ ; IR (neat,  $\text{cm}^{-1}$ ):  $3031$ ,  $2918$ ,  $1609$ ,  $1509$ ,  $1418$ ,  $1239$ ,  $1175$ ,  $1013$ ,  $816$ ,  $740$ ,  $697$ ; HR-ESIMS ( $m/z$ ): Calcd. for  $\text{C}_{18}\text{H}_{18}\text{IN}_2\text{O}$   $[\text{M}+\text{H}]^+$   $405.0458$ , found  $405.0470$ ; Calcd. for  $\text{C}_{18}\text{H}_{17}\text{IN}_2\text{ONa}$   $[\text{M}+\text{Na}]^+$   $427.0278$ , found  $427.0247$ .

**5-(4-Benzoyloxy)-benzyl-1-methyl-1H-imidazole-4-carboxaldehyde (11):** EtMgBr (3.0 M in

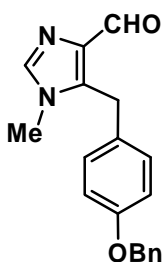

ether, 1.90 ml, 5.69 mmol) was added into a solution of **7** (2.19 g, 5.42 mmol) in dry THF (30 ml) at rt, and the resulting mixture was stirred at rt for 20 min. *N*-Methylformanilide (0.74 ml, 5.96 mmol) was added and the resulting mixture was stirred at rt overnight. Half saturated  $\text{NH}_4\text{Cl}$  was added to quench the reaction and the organic layer was extracted with EtOAc, dried ( $\text{Na}_2\text{SO}_4$ )

and concentrated to give the crude product. This residue was purified through a short plug of silica gel (hexane/EtOAc, 3:2) to give **11** as an off-white solid (1.09 g, 66%); m.p.  $148$ - $150$   $^\circ\text{C}$ ;  $^1\text{H}$  NMR ( $\text{CDCl}_3$ ):  $\delta = 10.01$  (s, 1H),  $7.51$  (s, 1H),  $7.41$ - $7.30$  (m, 5H),  $7.05$  (d,  $J = 8.7$  Hz, 2H),  $6.88$  (d,  $J = 8.7$  Hz, 2H),  $5.02$  (s, 2H),  $4.34$  (s, 2H),  $3.47$  (s, 3H);  $^{13}\text{C}$  NMR:  $\delta = 187.5$ ,  $157.9$ ,  $138.7$ ,  $138.0$ ,  $137.8$ ,  $136.9$ ,  $129.4$ ,  $128.7$ ,  $128.6$ ,  $128.1$ ,  $127.5$ ,  $115.3$ ,  $70.1$ ,  $31.7$ ,  $28.5$ ; IR (KBr,  $\text{cm}^{-1}$ ):  $3107$ ,  $3032$ ,  $2859$ ,  $1674$ ,  $1510$ ,  $1244$ ,  $1175$ ,  $799$ ,  $780$ ,  $740$ ,  $698$ ; HR-ESIMS ( $m/z$ ): Calcd. for  $\text{C}_{19}\text{H}_{19}\text{N}_2\text{O}_2$   $[\text{M}+\text{H}]^+$   $307.1441$ , found  $307.1462$ ; Calcd. for  $\text{C}_{19}\text{H}_{18}\text{N}_2\text{O}_2\text{Na}$   $[\text{M}+\text{Na}]^+$   $329.1260$ , found  $329.1258$ .

**{5-[4-(Benzoyloxy)-benzyl]-1-methyl-1H-imidazol-4-yl}-(4-methoxyphenyl)-methanol (12):**

A few drops of *p*-bromoanisole (from 2.21 ml, 17.6 mmol) was added dropwise to a two necked round-bottom flask containing freshly-crushed oven-dried, magnesium turnings (0.42 g, 17.6

mmol) and a small crystal of iodine in THF (20 ml). This mixture was then heated at 45 °C under

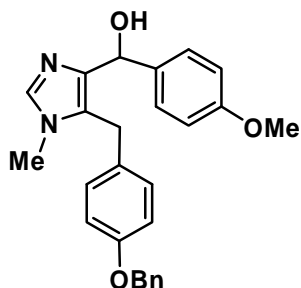

nitrogen until the iodine color faded. The remainder of the *p*-bromoanisole was added dropwise over 10 min while heating at the same temperature. After the addition was complete, the mixture was heated to reflux for 1 h and then cooled to rt, then, a solution of **3** (1.08 g, 3.52 mmol) in THF (10 ml) was added and the resulting

mixture was stirred at reflux overnight. After cooling to 0 °C, sat, NH<sub>4</sub>Cl (20 ml) was added and the organic layer was extracted with EtOAc (x3), washed once with brine, dried (Na<sub>2</sub>SO<sub>4</sub>), and concentrated to give a thick, brown oil. The crude product was purified through a short plug of silica gel (EtOAc) to give **12** as a pale yellow solid (1.47 g, 100%); m.p. 124-127 °C; <sup>1</sup>H NMR (CDCl<sub>3</sub>): δ = 7.42-7.29 (m, 8H), 6.89-6.76 (m, 6H), 5.78 (s, 1H), 5.00 (s, 2H), 4.38 (br, 1H), 3.78 (s, 2H), 3.73 (s, 3H), 3.28 (s, 3H); <sup>13</sup>C NMR δ = 158.8, 157.5, 140.9, 137.1, 137.0, 136.2, 130.2, 129.1, 128.7, 128.1, 127.6, 125.9, 115.1, 113.7, 70.1, 69.5, 55.3, 31.8, 28.2; IR (KBr, cm<sup>-1</sup>): 3198 (br), 3031, 2932, 2835, 1611, 1584, 1509, 1454, 1302, 1244, 1175, 1035, 801, 752, 698; HR-ESIMS (*m/z*): Calcd. for C<sub>26</sub>H<sub>27</sub>N<sub>2</sub>O<sub>3</sub> [M+H]<sup>+</sup> 415.2016, found 415.2016; Calcd. for C<sub>26</sub>H<sub>26</sub>N<sub>2</sub>O<sub>3</sub>Na [M+Na]<sup>+</sup> 437.1856, found 437.1817.

#### 5-[4-(Benzoyloxy)-benzyl]-4-[methoxy-(4-methoxy-phenyl)-methyl]-1-methyl-1H-imidazole

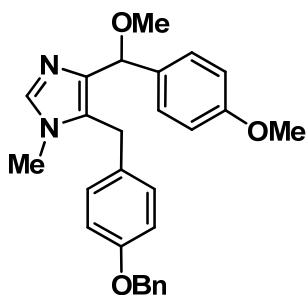

(**13**): TFA (0.53 ml, 6.81 mmol) was added to a solution of **4** (1.42 g, 3.41 mmol) in anhyd MeOH (20 ml) at rt and the mixture was then heated at 55 °C for overnight. Sat. aq. NaHCO<sub>3</sub> (20 ml) was added to the above reaction mixture and the aqueous layer was extracted with EtOAc (x3) and the organic layer was washed with

aq. NaHCO<sub>3</sub> (x2), washed with water, brine and dried (Na<sub>2</sub>SO<sub>4</sub>), concentrated to give **13** (1.58 g,

quant) as a pale yellow oil;  $^1\text{H NMR}$  ( $\text{CDCl}_3$ ):  $\delta = 7.51$  (s, 1H), 7.42-7.29 (m, 7H), 6.92-6.76 (m, 6H), 5.35 (s, 1 H), 5.02 (s, 2H), 3.95 (s, 2H), 3.77 (s, 3H), 3.35 (s, 3H), 3.33 (s, 3H);  $^{13}\text{C NMR}$ :  $\delta = 158.9, 157.5, 139.5, 137.2, 137.1, 133.7, 130.5, 129.2, 128.7, 128.2, 128.1, 1127.6, 127.1, 115.0, 113.7, 79.5, 70.1, 56.8, 55.3, 31.7, 28.3$ ; IR (neat,  $\text{cm}^{-1}$ ) = 3032, 2971, 2916, 1610, 1509, 1244, 1174, 1011, 804, 742; HR-ESIMS ( $m/z$ ): Calcd. for  $\text{C}_{27}\text{H}_{29}\text{N}_2\text{O}_3$   $[\text{M}+\text{H}]^+$  429.2117, found 429.2176; Calcd. for  $\text{C}_{27}\text{H}_{28}\text{N}_2\text{O}_3\text{Na}$   $[\text{M}+\text{Na}]^+$  451.1992, found 451.1955.

**2-Azido-5-[4-(benzoyloxy)-benzyl]-4-[methoxy-(4-methoxyphenyl)-methyl]-1-methyl-1H-**

**imidazole (14):** *n*-Butyl lithium (1.6 M solution in hexanes, 0.72 ml, 1.14 mmol) was added

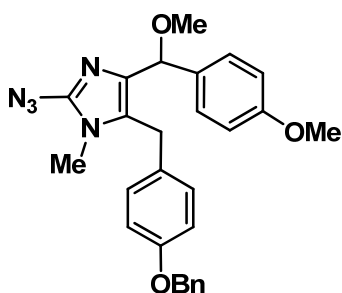

dropwise to a stirred solution of **5** (445 mg, 1.04 mmol) in dry THF (8 ml) at  $-78\text{ }^\circ\text{C}$ . The reaction was stirred for 30 min at the same temperature. The cooling bath was removed for 10 min, then the reaction mixture was re-cooled to  $-78\text{ }^\circ\text{C}$ , and then  $\text{TsN}_3$  (246 mg, 1.25 mmol) in THF (1 ml) was added dropwise. After

stirring for an additional 10 min at  $-78\text{ }^\circ\text{C}$ , the reaction mixture was allowed to come to rt and stirred for 40 min. The reaction was quenched by the careful addition of sat.  $\text{NH}_4\text{Cl}$  (3 ml). The aqueous layer was extracted with EtOAc (3x15 ml), and the combined organic extracts were dried ( $\text{Na}_2\text{SO}_4$ ) and concentrated to give a pale brown oil. The crude product was purified through a short column of silica gel (hexane/EtOAc, 4:1) to give unreacted starting material and **6** (283 mg, 58%) as a reddish brown oil;  $^1\text{H NMR}$  ( $\text{CDCl}_3$ ):  $\delta = 7.49$ -7.34 (m, 7H), 6.98-6.88 (m, 6H), 5.23 (s, 1 H), 5.02 (s, 2H), 3.85 (s, 2H), 3.78 (s, 3H), 3.35 (s, 3H), 3.04 (s, 3H);  $^{13}\text{C NMR}$   $\delta = 159.1, 157.6, 139.8, 137.1, 136.9, 133.4, 130.3, 129.2, 128.7, 128.5, 128.1, 127.6, 126.2, 115.1, 113.8, 79.2, 70.1, 56.9, 55.3, 29.5, 28.7$ ; IR (neat,  $\text{cm}^{-1}$ ): 3032, 2933, 2835, 2137, 1610, 1509, 1244, 1173, 1088, 1033, 832, 744, 697; HR-ESIMS ( $m/z$ ): Calcd. for  $\text{C}_{26}\text{H}_{24}\text{N}_5\text{O}_2$

$[M+H-\text{MeOH}]^+$  438.1925, found 438.1898 ; Calcd. for  $\text{C}_{27}\text{H}_{27}\text{N}_5\text{O}_3\text{Na}$   $[M+\text{Na}]^+$  492.2006, found 492.1977.

**2-Amino-5-[4-(hydroxy)-benzyl]-4-[methoxy-(4-methoxyphenyl)-methyl]-1-methyl-1H-**

**imidazole (6):** Azide **6** (258 mg, 0.55 mmol) was dissolved in EtOH (3 ml) and stirred under a

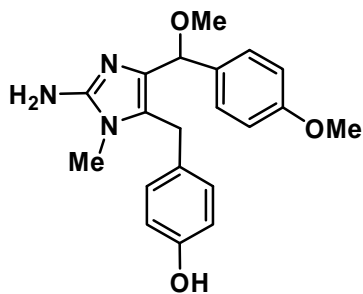

hydrogen atmosphere (55 psi) in the presence of 20% Pd(OH)<sub>2</sub>

on charcoal (77 mg) at rt for overnight. The catalyst was

filtered through a pad of celite and the filtrate was concentrated

to give amine **6** (196 mg, quant) as a pale yellow solid; m.p 91-

95 °C; <sup>1</sup>H NMR (500 MHz, CD<sub>3</sub>OD):  $\delta$  = 7.28 (d, *J* = 8.7 Hz,

2H), 6.87 (d, *J* = 8.2 Hz 2H), 6.83 (d, *J* = 8.7 Hz, 2H), 6.67 (d, *J* = 8.2 Hz, 2H), 5.25 (s, 1H),

3.83 (s, 2H), 3.74 (s, 3H), 3.31 (s, 3H), 3.11 (s, 3H); <sup>13</sup>C NMR  $\delta$  = 160.0, 156.3, 147.0, 130.8,

128.9, 127.8, 126.9, 124.3, 123.3, 115.4, 113.8, 75.1, 55.7, 54.5, 28.7, 27.0; IR (KBr, cm<sup>-1</sup>) =

3548, 3475, 3417, 2996, 2934, 1614, 1512, 1247, 1174, 1114, 823, 618.; HR-ESIMS (*m/z*):

Calcd. for  $\text{C}_{20}\text{H}_{24}\text{N}_3\text{O}_3$   $[M+H]^+$  354.1827, found 354.1812; Calcd. for  $\text{C}_{20}\text{H}_{23}\text{N}_3\text{O}_3\text{Na}$   $[M+\text{Na}]^+$

376.1645, found 376.1632.

**2-Amino-5-(4-hydroxy-benzyl)-5-[methoxy-(4-methoxy-phenyl)-methyl]-3-methyl-3,5-**

**dihydro-imidazol-4-one (Calcaridine A):** Amine **6** (175 mg, 0.51 mmol) and 2-

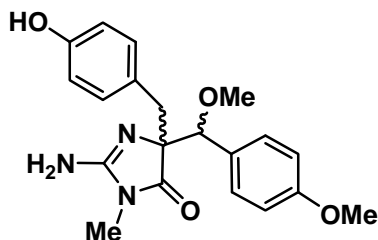

benzenesulfonyl-3-(4-nitrophenyl)oxaziridine (311 mg, 1.02

mmol) were dissolved in methanol (5 ml) at rt. Then, the

mixture was heated at 40 °C for 4 h. After checking TLC the

reaction was stopped, concentrated and purified by flash

column chromatography using 10% methanol in EtOAc to

give a pale yellow solid (100 mg, 54%), of a 1:2 mixture of diastereomers calcaridine A and *epi*-calcaridine A.

**1-Methyl-4-iodoimidazole-5-carboxaldehyde (16):** A solution of EtMgBr (3.0 M in ether, 2.62

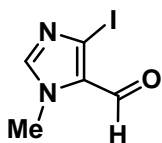

ml, 7.86 mmol) was added into a solution of 4,5-diiodo-1-methyl-1H-imidazole (**8**) (2.50 g, 7.50 mmol) in dry CH<sub>2</sub>Cl<sub>2</sub> (20 ml) at rt over 10 min. The resulting mixture was stirred at rt under nitrogen atmosphere with monitoring

by TLC to ensure all starting material reacted with the Grignard reagent. Then, *N*-methylformanilide (1.01 ml, 8.23 mmol) was added dropwise to above mixture and stirred at rt for a further 16 h. Half saturated NH<sub>4</sub>Cl (10 ml) was added to it and the resulting suspension was extracted with dichloromethane. The organic layer was dried (Na<sub>2</sub>SO<sub>4</sub>), concentrated and the resulting residue was purified by flash chromatography (EtOAc/hexanes, 1:4) to give a white solid, **1** (1.09 g, 61%); m.p. 69-72 °C; <sup>1</sup>H NMR (CDCl<sub>3</sub>): δ = 9.62 (d, *J* = 0.5 Hz, 1H), 7.55 (s, 1H), 3.91 (s, 3H); <sup>13</sup>C NMR: δ = 181.3, 145.0, 130.0, 100.3, 34.5; IR (KBr, cm<sup>-1</sup>): = 2811, 1666, 1504, 1338, 1243, 964, 782, 707; HR-ESIMS (*m/z*): Calcd. for C<sub>5</sub>H<sub>6</sub>IN<sub>2</sub>O [M+H]<sup>+</sup> 236.9519, found 236.9527; Calcd. for C<sub>5</sub>H<sub>5</sub>IN<sub>2</sub>ONa [M+Na]<sup>+</sup> 258.9339, found 258.9362.

**5-[1,3]Dioxolan-2-yl-4-iodo-1-methyl-1H-imidazole (17):** *p*-Toluenesulfonic acid monohydrate

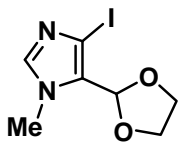

(140 mg, 0.74 mmol) and ethylene glycol (95%, 4.10 ml, 73.7 mmol) were added to a solution of **1** (3.48 g, 14.7 mmol) in toluene (75 ml). The reaction mixture was heated to reflux for 22 h with a Dean-Stark condenser fitted.

The mixture was cooled to rt, and then the reaction mixture was washed with sat. NaHCO<sub>3</sub> (3x25 ml) and water. The resulting toluene solution was dried (Na<sub>2</sub>SO<sub>4</sub>), concentrated and purified by chromatography (hexane/EtOAc, 65:35) to give **17** (4.02 g, 97%) as an off-white solid; m.p. 115 - 118 °C; <sup>1</sup>H NMR (CDCl<sub>3</sub>): δ = 7.39 (s, 1H), 5.79 (s, 1H), 4.15 (m, 2H), 4.04 (m, 2H), 3.69 (s,

3H);  $^{13}\text{C}$  NMR:  $\delta = 141.9, 127.0, 98.8, 87.8, 65.3, 33.2$ ; IR (KBr,  $\text{cm}^{-1}$ ): = 2951, 2887, 1578, 1494, 1473, 1370, 1245, 1217, 1085, 952, 815; HR-ESIMS ( $m/z$ ): Calcd. for  $\text{C}_7\text{H}_{10}\text{IN}_2\text{O}_2$   $[\text{M}+\text{H}]^+$  280.9782, found 280.9791; Calcd. for  $\text{C}_7\text{H}_9\text{IN}_2\text{O}_2\text{Na}$   $[\text{M}+\text{Na}]^+$  302.9610, found 302.9612.

**(4-Benzyloxyphenyl)-(5-[1,3]dioxolan-2-yl-1-methyl-1H-imidazol-4-yl)-methanol (18):** A

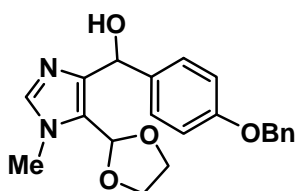

solution of EtMgBr (3.0 M in ether, 2.67 ml, 8.02 mmol) was added to a solution of **2** (2.14 g, 7.64 mmol) in dry THF (20 ml) at rt over 10 min. The resulting mixture was stirred at rt until all the starting material reacted (TLC analysis, ca. 30 min) and then 4-benzyloxybenzaldehyde (1.78 g, 8.40 mmol) in dry THF (10 ml) was added at rt followed by stirring for 38 h. Saturated aq.  $\text{NH}_4\text{Cl}$  (10 ml) was added to quench the reaction and the organic layer was extracted with EtOAc and washed once with brine. The EtOAc solution was dried (anhyd.  $\text{Na}_2\text{SO}_4$ ) and concentrated to give the crude product which was purified by column chromatography (EtOAc $\rightarrow$ EtOH/EtOAc, 1:9) to give **18** as a white solid (2.46 g, 87%); m.p. 160-162  $^\circ\text{C}$ ;  $^1\text{H}$  NMR ( $\text{CDCl}_3$ ):  $\delta = 7.40\text{-}7.27$  (m, 8H), 6.92 (d,  $J = 8.3$  Hz, 2H), 5.90 (s, 1H), 5.84 (s, 1H), 5.03 (s, 2H), 4.00 (m, 2H), 3.92 (m, 2H), 3.66 (s, 3H);  $^{13}\text{C}$  NMR:  $\delta = 158.1, 145.0, 138.8, 137.2, 136.2, 128.6, 128.0, 127.9, 127.5, 121.8, 114.7, 97.3, 70.1, 69.5, 65.1, 33.0$ ; IR (KBr,  $\text{cm}^{-1}$ ): = 3176 (br), 3120, 2918, 1606, 1511, 1419, 1226, 1076, 1035, 951, 843, 698; HR-ESIMS ( $m/z$ ): Calcd. for  $\text{C}_{21}\text{H}_{23}\text{N}_2\text{O}_4$   $[\text{M}+\text{H}]^+$  367.1652, found 367.1662; Calcd. for  $\text{C}_{21}\text{H}_{22}\text{N}_2\text{O}_4\text{Na}$   $[\text{M}+\text{Na}]^+$  389.1472, found 389.1469.



**4-[(4-benzyloxyphenyl)-hydroxymethyl]-1-methyl-1H-imidazole-5-carboxaldehyde:** 10%

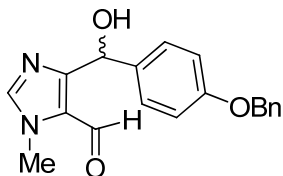

HCl (10 ml) was added to a solution of acetal **3** (2.23 g, 6.09 mmol) in THF (100 ml) and the resulting cloudy reaction was heated at 55 °C (The reaction became clear while all solid dissolving after 10 min) while the reaction progress was monitored by taking 0.5 ml aliquots and neutralizing with sat'd NaHCO<sub>3</sub>. The aqueous layer was extracted with EtOAc, and the organic layer was dried over anhyd. Na<sub>2</sub>SO<sub>4</sub> and concentrated to give the crude product which was evaluated by H<sup>1</sup> NMR. After all starting material was consumed (2 h), the reaction was worked-up following the above procedure giving the pure aldehyde (1.95 g, quant), as a cream colored solid, was isolated; m.p. 135 °C; <sup>1</sup>H NMR (CDCl<sub>3</sub>): δ = 9.90 (s, 1H), 7.46 (s, 1H), 7.41-7.31 (m, 7H), 6.94 (d, *J* = 8.7 Hz, 2 H), 6.01 (s, 1H), 5.03 (s, 2H), 3.87 (s, 3H); <sup>13</sup>C NMR: δ = 180.4, 158.7, 156.8, 142.1, 137.0, 135.1, 128.7, 128.1, 128.0, 127.5, 126.6, 115.1, 70.9, 70.1, 34.5; IR (KBr, cm<sup>-1</sup>) = 3327 (br), 3088, 3009, 2862, 1655, 1513, 1352, 1297, 1245, 1045, 1014, 807, 786, 741, 715; HR-ESIMS (*m/z*): Calcd. for C<sub>19</sub>H<sub>19</sub>N<sub>2</sub>O<sub>3</sub> [M+H]<sup>+</sup> 323.1390, found 323.1382; Calcd. for C<sub>19</sub>H<sub>18</sub>N<sub>2</sub>O<sub>3</sub>Na [M+Na]<sup>+</sup> 345.1210, found 345.1198.

**4-(4-Benzyloxy)benzyl-1-methyl-1H-imidazole-5-carbaldehyde (19):** Et<sub>3</sub>SiH (3.86 ml, 24.20

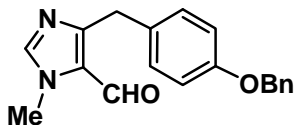

mmol) and TFA (2.80 ml, 36.29 mmol) were added to a solution of the aldehyde **4** (1.95 g, 6.05 mmol) in anhydrous CHCl<sub>3</sub> (100 ml) under nitrogen at r.t. Then the resulting mixture was stirred for 24 h while monitoring the reaction progress by TLC. Then, the reaction was quenched with saturated aqueous NaHCO<sub>3</sub> solution. The organic layer was extracted with CHCl<sub>3</sub> (3x50 ml). Combined organic extracts were dried over anhyd. Na<sub>2</sub>SO<sub>4</sub> and concentrated to give a yellowish white solid, which was purified over silica gel with (EtOAc/hexanes, 3:1) to give **19** as a pale

yellow solid, (1.21 g, 65%); m.p. 85 - 86 °C; <sup>1</sup>H NMR (CDCl<sub>3</sub>): δ = 9.85 (s, 1H), 7.47 (s, 1H), 7.40-7.30 (m, 5H), 7.18 (d, *J* = 8.7 Hz, 2 H), 6.90 (d, *J* = 8.7 Hz, 2 H), 5.01 (s, 2H), 4.12 (s, 2H), 3.85 (s, 3H); <sup>13</sup>C NMR: δ = 179.1, 157.6, 155.8, 142.9, 137.1, 131.3, 129.7, 128.6, 128.0, 127.5, 127.0, 115.2, 70.1, 34.4, 33.2; IR (KBr, cm<sup>-1</sup>) = 3121, 3058, 3028, 2915, 2826, 2746, 1763, 1665, 1520, 1332, 1247, 1171, 1009, 845, 744, 699, 633; HR-ESIMS (*m/z*): Calcd. for C<sub>19</sub>H<sub>19</sub>N<sub>2</sub>O<sub>2</sub> [M+H]<sup>+</sup> 307.1441, found 307.1444; Calcd. for C<sub>19</sub>H<sub>18</sub>N<sub>2</sub>O<sub>2</sub>Na [M+Na]<sup>+</sup> 329.1266, found 329.1207.

#### 4-(4-Benzyloxybenzyl)-5-[hydroxyl-(4-methoxyphenyl)-methyl]-1-methyl-1H-imidazole

(**20**): A few drops of *p*-bromoanisole (from 1.98 ml, 15.8 mmol) was added dropwise to a two

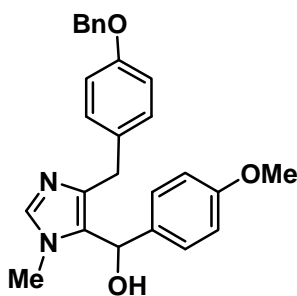

neck round-bottom flask containing freshly-crushed, oven-dried magnesium turnings (0.38 g, 15.8 mmol) and a small crystal of iodine in THF (25 ml). This mixture was then heated at 45 °C under nitrogen until the iodine color faded. The rest of the *p*-bromoanisole was added dropwise over 10 min while heating at

the same temperature. After the addition was completed, the mixture was heated at reflux for 1 h and cooled to rt. A solution of **5** (1.21 g, 3.95 mmol) in THF (10 ml) was added. The resulting mixture was stirred at reflux for overnight and cooled to 0 °C; sat. NH<sub>4</sub>Cl (20 ml) was added and the organic layer was extracted with EtOAc (x3), washed once with brine, and dried over anhyd. Na<sub>2</sub>SO<sub>4</sub>, concentrated to give thick brown oil, which was purified by a short plug of silica gel with 100% EtOAc to give a white solid, **20** (1.64 g, 84%); m.p. 148-149 °C; <sup>1</sup>H NMR (CDCl<sub>3</sub>): δ = 7.41-7.25 (m, 6H), 7.16 (d, *J* = 8.5 Hz, 2 H), 7.10 (d, *J* = 8.5 Hz, 2 H), 6.85 (d, *J* = 8.5 Hz, 2 H), 6.81 (d, *J* = 8.8 Hz, 2 H), 6.05 (s, 1H), 4.99 (s, 2H), 3.88 (s, 2 H), 3.78 (s, 3H), 3.34 (s, 3H); <sup>13</sup>C NMR: δ = 159.0, 157.3, 138.4, 137.2, 132.6<sub>1</sub>, 132.5<sub>5</sub>, 129.7, 129.0, 128.6, 128.0,

127.5, 127.0, 115.1, 113.9, 70.1, 65.5, 55.4, 33.4, 32.1; IR (KBr,  $\text{cm}^{-1}$ ) = 3200 (br), 3115, 2998, 2908, 2834, 1611, 1510, 1459, 1238, 1173, 1032, 804, 697; HR-ESIMS ( $m/z$ ): Calcd. for  $\text{C}_{26}\text{H}_{27}\text{N}_2\text{O}_3$   $[\text{M}+\text{H}]^+$  415.2016, found 415.2034; Calcd. for  $\text{C}_{26}\text{H}_{26}\text{N}_2\text{O}_3\text{Na}$   $[\text{M}+\text{Na}]^+$  437.1836, found 437.1819.

#### 4-(4-Benzyloxybenzyl)-5-[methoxy-(4-methoxyphenyl)-methyl]-1-methyl-1H-imidazole (**21**)

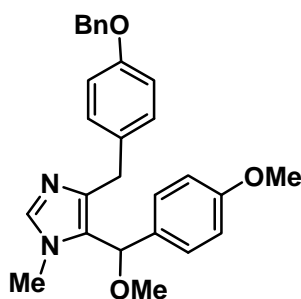

NaH (60%, 162 mg, 4.05 mmol) was added portionwise to a stirred mixture of alcohol **20** (1.12 g, 2.70 mmol) in anhydrous THF (25 ml) at 0 °C. After completion of the addition the resulting mixture was stirred for 10 min at the same temperature. The reaction was warmed to rt and stirred for 1.5 h and then re-cooled (0 °C) followed by the dropwise addition of MeI (0.20 ml). After 10 min the reaction was allowed to come to rt and stirred for 36 h. Water (20 ml) was added to the reaction mixture and the aqueous layer was extracted with EtOAc (3x30 ml). The organic solution was dried ( $\text{Na}_2\text{SO}_4$ ), concentrated and the residue was purified through short plug of silica gel with (EtOAc/hexanes, 3:1) to give the **21** as a pale yellow oil (0.97 g, 84%);  $^1\text{H}$  NMR ( $\text{CDCl}_3$ ):  $\delta$  = 7.41-7.25 (m, 6H), 7.20 (d,  $J$  = 8.3 Hz, 2 H), 7.09 (d,  $J$  = 8.7 Hz, 2 H), 6.88 (d,  $J$  = 8.3 Hz, 2 H), 6.81 (d,  $J$  = 8.7 Hz, 2 H), 5.48 (s, 1H), 5.01 (s, 2H), 3.94 (s, 2 H), 3.76 (s, 3H), 3.27 (s, 3H), 3.23 (s, 3H);  $^{13}\text{C}$  NMR:  $\delta$  = 158.9, 157.2, 142.1, 138.4, 137.3, 133.3, 132.0, 129.7, 128.6, 127.9, 127.5, 127.3, 125.2, 114.9, 113.8, 75.0, 70.1, 56.6, 55.3, 33.0, 32.7; IR (neat,  $\text{cm}^{-1}$ ): 3032, 2931 1609, 1509, 1246, 1174, 1086, 1031, 805, 741, 698; HR-ESIMS ( $m/z$ ): Calcd. for  $\text{C}_{27}\text{H}_{29}\text{N}_2\text{O}_3$   $[\text{M}+\text{H}]^+$  429.2173, found 429.2181; Calcd. for  $\text{C}_{27}\text{H}_{28}\text{N}_2\text{O}_3\text{Na}$   $[\text{M}+\text{Na}]^+$  451.1992, found 451.1951.

**2-Azido-4-(4-benzyloxybenzyl)-5-[methoxy-(4-methoxyphenyl)-methyl]-1-methyl-1H-**

**imidazole (22):** *n*-Butyl lithium (1.33 M solution in hexane, 1.87 ml, 2.49 mmol) was added

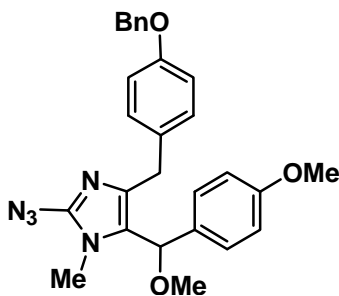

dropwise to a stirred solution of **7** (888 mg, 2.07 mmol) in dry THF (10 ml) at -78 °C. The reaction mixture was stirred for 45 min at the same temperature. Then, the ice/acetone bath was removed for 5 min followed by re-cooling to -78 °C and dropwise addition of TsN<sub>3</sub> (491 mg, 2.49 mmol). After 1 h stirring at -78 °C, the reaction was quenched by the careful addition of sat.

NH<sub>4</sub>Cl solution (3 ml). The aqueous layer was extracted with EtOAc (3x25 ml), and then the combined organics were dried (Na<sub>2</sub>SO<sub>4</sub>) and concentrated to give a pale brown oil, which was purified through a short column of silica gel (hexane/EtOAc, 4:1) to give **8** (972 mg, 76%) as a thick, pale yellow oil; <sup>1</sup>H NMR (CDCl<sub>3</sub>): δ = 7.42-7.31 (m, 5H), 7.20 (d, *J* = 8.7 Hz, 2H), 7.07 (d, *J* = 8.7 Hz, 2H), 6.88 (d, *J* = 8.7 Hz, 2H), 6.79 (d, *J* = 8.7 Hz, 2H), 5.37 (s, 1H), 5.03 (s, 2H), 3.90 (s, 2H), 3.78 (s, 3H), 3.21 (s, 3H), 3.02 (s, 3H); <sup>13</sup>C NMR: δ = 158.9, 157.3, 140.8, 139.6, 137.3, 133.0, 131.8, 129.7, 128.6, 128.0, 127.5, 127.3, 124.3, 114.9, 113.8, 75.0, 70.1, 56.5, 55.3, 32.8, 30.4; IR (neat cm<sup>-1</sup>): 2932, 2835, 2136, 1610, 1509, 1248, 1172, 1085, 1033, 833, 738, 697; HR-ESIMS (*m/z*): Calcd. for C<sub>27</sub>H<sub>28</sub>N<sub>5</sub>O<sub>3</sub> [M+H]<sup>+</sup> 470.2187, found 470.2191; Calcd. for C<sub>27</sub>H<sub>27</sub>N<sub>5</sub>O<sub>3</sub>Na [M+Na]<sup>+</sup> 492.2006, found 492.1969.

**(4*R*\*, 8*S*\*) and (4*R*\*, 8*R*\*)-2-Azido-4-(4-benzyloxybenzyl)-4-[methoxy-(4-methoxyphenyl)-**

**methyl]-1-methyl-1,5-dihydroimidazol-5-one (24) and (*epi*-24):** 3-(4-Nitrophenyl)-2-

(phenylsulfonyl)oxaziridine (254 mg, 0.83 mmol) was added to a stirred solution of azide **22**

(255 mg, 0.54 mmol) in CHCl<sub>3</sub> (3 ml) at rt and stirred overnight. On completion of the reaction,

the solvent was removed and the yellow residue was purified by gravity column chromatography

(CH<sub>2</sub>Cl<sub>2</sub>/toluene, 1:1) to give *epi*-**24** (123 mg, 47%) as a pale yellow semi-solid; <sup>1</sup>H NMR

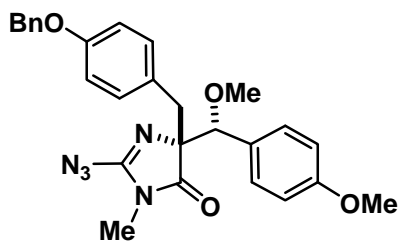

(CDCl<sub>3</sub>): δ = 7.36-7.26 (m, 5H), 6.95 (d, *J* = 8.7 Hz, 2H), 6.78 (d, *J* = 8.7 Hz, 2H), 6.72 (d, *J* = 8.7 Hz, 2H), 6.68 (d, *J* = 8.7 Hz, 2H), 4.90 (s, 2H), 4.78 (s, 1H), 3.92 (d, *J* = 14.2 Hz, 1 H), 3.72 (s, 3H), 3.35 (d, *J* = 14.2 Hz, 1 H), 3.33 (s, 3H), 2.76 (s, 3H); <sup>13</sup>C NMR: δ = 173.7, 160.2, 158.4, 158.3,

136.7, 130.7, 128.9, 128.6, 128.1, 127.6, 125.4, 124.5, 115.0, 114.0, 84.1, 79.0, 70.0, 57.7, 55.3, 38.3, 27.1 ; IR (neat, cm<sup>-1</sup>) = 2931, 1764, 1599, 1512, 1455, 1250, 1177, 1098, 1029, 834, 797, 738, 698; Calcd. for C<sub>27</sub>H<sub>28</sub>N<sub>5</sub>O<sub>4</sub> [M+H]<sup>+</sup> 486.2136, found 486.2141.

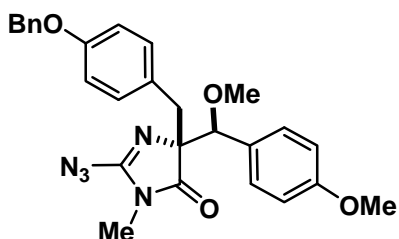

From the above reaction **24** (121 mg, 46%) as a pale yellow solid; m.p. 54-56 °C; <sup>1</sup>H NMR (CDCl<sub>3</sub>): δ = 7.35-7.26 (m, 7H), 6.99 (d, *J* = 8.7 Hz, 2H), 6.65 (m, 4 H), 4.90 (s, 2H), 4.77 (s, 1H), 3.85 (s, 3H), 3.25 (d, *J* = 14.2 Hz, 1

H), 3.13 (s, 3H), 3.05 (s, 3H), 2.94 (d, *J* = 14.2 Hz, 1 H); <sup>13</sup>C NMR δ = 175.4, 160.7, 159.1, 158.3, 136.7, 130.5, 130.1, 128.6, 128.1, 127.6, 125.3, 123.6, 114.9, 114.3, 84.2, 79.0, 69.9, 57.1, 55.4, 38.4, 27.4 ; IR (neat, cm<sup>-1</sup>) = 2931, 1764, 1599, 1512, 1455, 1250, 1177, 1098, 1029, 834, 797, 738, 698; Calcd. for C<sub>27</sub>H<sub>28</sub>N<sub>5</sub>O<sub>4</sub> [M+H]<sup>+</sup> 486.2136, found 486.2138.

(*4R*\*, *8R*\*)-*epi*-Calcaridine *epi*-**(1)**: Azide *epi*-**24** (94 mg, 0.20 mmol) was dissolved in EtOH (3

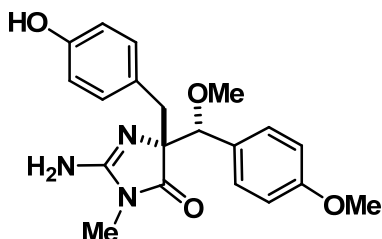

ml) and stirred under a hydrogen atmosphere (55 psi) in the presence of 20% Pd(OH)<sub>2</sub> on charcoal (40 mg) at rt overnight.

The catalyst was filtered through a pad of Celite and the filtrate was concentrated to give *epi*-calcaridine A, *epi*-**1** (73

mg, quant) as an off-white solid; m.p. 218-220 °C ; <sup>1</sup>H NMR (CD<sub>3</sub>OD): δ = 7.20 (d, *J* = 8.7 Hz,

2H), 6.94 (d,  $J = 8.7$  Hz, 2H), 6.89 (d,  $J = 8.7$  Hz, 2H), 6.66 (d,  $J = 8.7$  Hz, 2H), 4.59 (s, 1 H), 3.77 (s, 3H), 3.43 (d,  $J = 14.2$  Hz, 1 H), 3.31 (s, 3H), 3.18 (d,  $J = 14.2$  Hz, 1 H), 2.51 (s, 3H);  $^{13}\text{C}$  NMR:  $\delta = 172.2, 160.5, 157.8, 156.8, 130.9, 129.0, 126.2, 124.40, 114.9, 113.5, 84.1, 73.5, 56.3, 54.4, 38.3, 24.1$ ; IR (KBr,  $\text{cm}^{-1}$ ) = 3311 (br), 3001, 2830, 1770, 1693, 1613, 1560, 1513, 1440, 1309, 1256, 1089, 1032, 832, 793, 718; HR-ESIMS ( $m/z$ ): Calcd. for  $\text{C}_{20}\text{H}_{24}\text{N}_3\text{O}_4$   $[\text{M}+\text{H}]^+$  370.1761, found 370.1761; Calcd. for  $\text{C}_{20}\text{H}_{23}\text{N}_3\text{O}_4\text{Na}$   $[\text{M}+\text{Na}]^+$  392.1586, found 392.1512.

**(4*R*\*, 8*S*\*)-Calcaridine A (1)**: Following the procedure above, azide **24** (102 mg, 0.21 mmol)

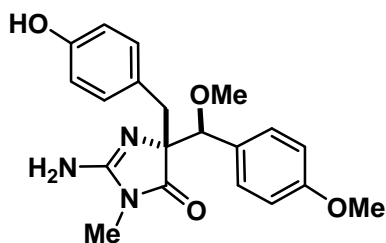

and 20%  $\text{Pd}(\text{OH})_2$  on charcoal (40 mg) in EtOH (3 ml) gave

calcaridine A, (**1**) (78 mg, quant) as a pale yellow solid; m.p.

163-165  $^{\circ}\text{C}$ ;  $^1\text{H}$  NMR ( $\text{CD}_3\text{OD}$ ):  $\delta = 7.37$  (d,  $J = 8.3$  Hz,

2H), 7.03 (d,  $J = 8.3$  Hz, 2H), 6.86 (d,  $J = 8.3$  Hz, 2H), 6.64

(d,  $J = 8.3$  Hz, 2H), 4.58 (s, 1H), 3.82 (s, 3H), 3.16 (s, 3H), 3.16 (d,  $J = 14.2$  Hz, 1H), 2.83 (s,

3H), 2.50 (d,  $J = 14.2$  Hz, 1H);  $^{13}\text{C}$  NMR  $\delta = 173.3, 160.7, 158.7, 156.9, 130.8, 129.4, 126.1,$

123.0, 114.9, 114.1, 84.2, 73.1, 56.1, 54.6, 37.9, 24.6; IR (KBr,  $\text{cm}^{-1}$ ) = 3265 (br), 2833, 1781,

1692, 1612, 1560, 1513, 1449, 1346, 1250, 1093, 1023, 836, 799; HR-ESIMS ( $m/z$ ): Calcd. for

$\text{C}_{20}\text{H}_{24}\text{N}_3\text{O}_4$   $[\text{M}+\text{H}]^+$  370.1761, found 370.1761.

**X-ray crystallography.** A suitable crystal of compound *epi-1* covered with a layer of hydrocarbon oil was selected and mounted with paratone-N oil in a cryo-loop, and immediately placed in the low-temperature nitrogen stream. The X-ray intensity data were measured at 100(2) K on a Bruker SMART APEX CCD area detector system equipped with a Oxford Cryosystems 700 Series cooler, a graphite monochromator, and a Mo K $\alpha$  fine-focus sealed tube ( $\lambda = 0.71073 \text{ \AA}$ ). The data frames were integrated with the Bruker SAINT-Plus software package. Data were corrected for absorption effects using the multi-scan technique (SADABS). Structures were solved and refined using Bruker SHELXTL (Version 6.14) software package. Further details are in the cif file (deposited at the Cambridge Crystallographic Data Centre, CCDC 696635).

**Table S1.** Crystal data and structure refinement for *epi-1*•MeOH.

|                        |                                                               |                              |
|------------------------|---------------------------------------------------------------|------------------------------|
| Identification code    | dias530s                                                      |                              |
| Empirical formula      | C <sub>21</sub> H <sub>27</sub> N <sub>3</sub> O <sub>5</sub> |                              |
| Formula weight         | 401.46                                                        |                              |
| Temperature            | 100(2) K                                                      |                              |
| Wavelength             | 0.71073 Å                                                     |                              |
| Crystal system         | Monoclinic                                                    |                              |
| Space group            | P2(1)/n                                                       |                              |
| Unit cell dimensions   | a = 12.3916(6) Å                                              | $\alpha = 90^\circ$ .        |
|                        | b = 8.4464(4) Å                                               | $\beta = 101.228(1)^\circ$ . |
|                        | c = 19.6714(10) Å                                             | $\gamma = 90^\circ$ .        |
| Volume                 | 2019.49(17) Å <sup>3</sup>                                    |                              |
| Z                      | 4                                                             |                              |
| Density (calculated)   | 1.320 Mg/m <sup>3</sup>                                       |                              |
| Absorption coefficient | 0.095 mm <sup>-1</sup>                                        |                              |

|                                   |                                             |
|-----------------------------------|---------------------------------------------|
| F(000)                            | 856                                         |
| Crystal size                      | 0.36 x 0.15 x 0.08 mm <sup>3</sup>          |
| Theta range for data collection   | 1.80 to 26.00°.                             |
| Index ranges                      | -15<=h<=15, -10<=k<=10, -24<=l<=24          |
| Reflections collected             | 16278                                       |
| Independent reflections           | 3969 [R(int) = 0.0248]                      |
| Completeness to theta = 26.00°    | 100.0 %                                     |
| Absorption correction             | Semi-empirical from equivalents             |
| Max. and min. transmission        | 0.9929 and 0.9665                           |
| Refinement method                 | Full-matrix least-squares on F <sup>2</sup> |
| Data / restraints / parameters    | 3969 / 0 / 274                              |
| Goodness-of-fit on F <sup>2</sup> | 1.043                                       |
| Final R indices [I>2sigma(I)]     | R1 = 0.0477, wR2 = 0.1291                   |
| R indices (all data)              | R1 = 0.0544, wR2 = 0.1372                   |
| Largest diff. peak and hole       | 0.777 and -0.600 e.Å <sup>-3</sup>          |

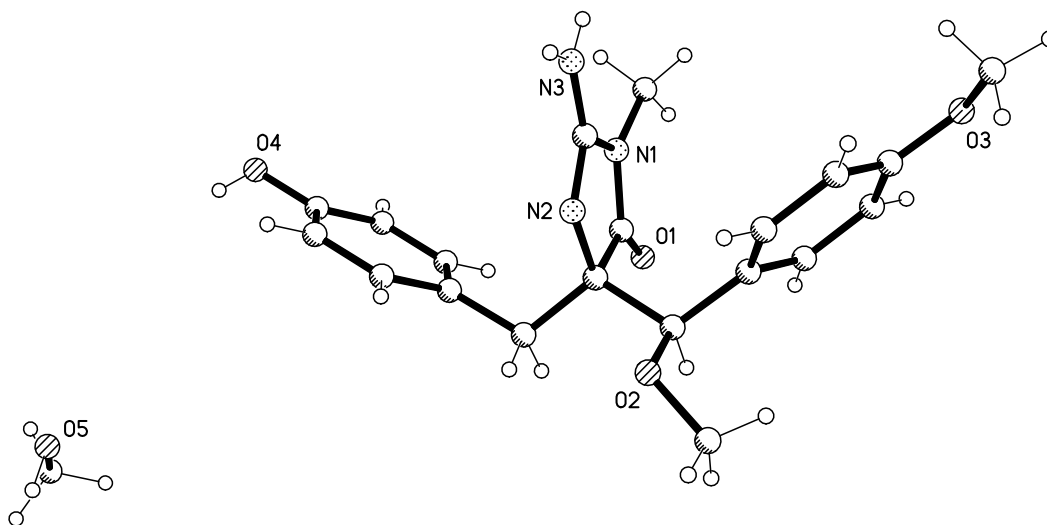

**Figure S1.** Crystal structure of *epi-1*•MeOH (*epi-1* crystallizes with a molecule of MeOH)



**Table S2.** Bond lengths [Å] and angles [°] for *epi-1*•MeOH.

---

|            |            |              |          |
|------------|------------|--------------|----------|
| N(1)-C(2)  | 1.368(2)   | C(7)-C(8)    | 1.387(2) |
| N(1)-C(1)  | 1.398(2)   | C(7)-H(7)    | 0.9500   |
| N(1)-C(4)  | 1.453(2)   | C(8)-C(9)    | 1.392(2) |
| N(2)-C(1)  | 1.348(2)   | C(8)-H(8)    | 0.9500   |
| N(2)-C(3)  | 1.460(2)   | C(9)-C(10)   | 1.390(2) |
| N(3)-C(1)  | 1.280(2)   | C(10)-C(11)  | 1.384(2) |
| N(3)-H(3A) | 0.8800     | C(10)-H(10)  | 0.9500   |
| N(3)-H(3B) | 0.8800     | C(11)-H(11)  | 0.9500   |
| O(1)-C(2)  | 1.2165(19) | C(12)-C(13)  | 1.518(2) |
| O(2)-C(12) | 1.4176(19) | C(12)-H(12)  | 1.0000   |
| O(2)-C(19) | 1.426(2)   | C(13)-C(14)  | 1.389(2) |
| O(3)-C(16) | 1.369(2)   | C(13)-C(18)  | 1.401(2) |
| O(3)-C(20) | 1.427(2)   | C(14)-C(15)  | 1.390(2) |
| O(4)-C(9)  | 1.372(2)   | C(14)-H(14)  | 0.9500   |
| O(4)-H(4D) | 0.76(3)    | C(15)-C(16)  | 1.393(2) |
| O(5)-C(21) | 1.400(2)   | C(15)-H(15)  | 0.9500   |
| O(5)-H(5D) | 0.88(3)    | C(16)-C(17)  | 1.396(2) |
| C(2)-C(3)  | 1.525(2)   | C(17)-C(18)  | 1.382(2) |
| C(3)-C(5)  | 1.540(2)   | C(17)-H(17)  | 0.9500   |
| C(3)-C(12) | 1.554(2)   | C(18)-H(18)  | 0.9500   |
| C(4)-H(4A) | 0.9800     | C(19)-H(19A) | 0.9800   |
| C(4)-H(4B) | 0.9800     | C(19)-H(19B) | 0.9800   |
| C(4)-H(4C) | 0.9800     | C(19)-H(19C) | 0.9800   |
| C(5)-C(6)  | 1.511(2)   | C(20)-H(20A) | 0.9800   |
| C(5)-H(5A) | 0.9900     | C(20)-H(20B) | 0.9800   |
| C(5)-H(5B) | 0.9900     | C(20)-H(20C) | 0.9800   |
| C(6)-C(7)  | 1.393(2)   | C(21)-H(21A) | 0.9800   |
| C(6)-C(11) | 1.397(2)   | C(21)-H(21B) | 0.9800   |

|                  |            |                   |            |
|------------------|------------|-------------------|------------|
| C(21)-H(21C)     | 0.9800     |                   |            |
| C(2)-N(1)-C(1)   | 111.30(13) | H(4B)-C(4)-H(4C)  | 109.5      |
| C(2)-N(1)-C(4)   | 123.62(14) | C(6)-C(5)-C(3)    | 113.47(13) |
| C(1)-N(1)-C(4)   | 124.89(13) | C(6)-C(5)-H(5A)   | 108.9      |
| C(1)-N(2)-C(3)   | 111.83(13) | C(3)-C(5)-H(5A)   | 108.9      |
| C(1)-N(3)-H(3A)  | 120.0      | C(6)-C(5)-H(5B)   | 108.9      |
| C(1)-N(3)-H(3B)  | 120.0      | C(3)-C(5)-H(5B)   | 108.9      |
| H(3A)-N(3)-H(3B) | 120.0      | H(5A)-C(5)-H(5B)  | 107.7      |
| C(12)-O(2)-C(19) | 111.82(13) | C(7)-C(6)-C(11)   | 117.39(15) |
| C(16)-O(3)-C(20) | 116.77(14) | C(7)-C(6)-C(5)    | 121.25(15) |
| C(9)-O(4)-H(4D)  | 104(2)     | C(11)-C(6)-C(5)   | 121.35(15) |
| C(21)-O(5)-H(5D) | 107.9(16)  | C(8)-C(7)-C(6)    | 121.61(15) |
| N(3)-C(1)-N(2)   | 129.69(15) | C(8)-C(7)-H(7)    | 119.2      |
| N(3)-C(1)-N(1)   | 122.20(15) | C(6)-C(7)-H(7)    | 119.2      |
| N(2)-C(1)-N(1)   | 108.11(13) | C(7)-C(8)-C(9)    | 119.95(15) |
| O(1)-C(2)-N(1)   | 126.35(15) | C(7)-C(8)-H(8)    | 120.0      |
| O(1)-C(2)-C(3)   | 126.69(14) | C(9)-C(8)-H(8)    | 120.0      |
| N(1)-C(2)-C(3)   | 106.94(13) | O(4)-C(9)-C(10)   | 118.46(15) |
| N(2)-C(3)-C(2)   | 101.72(12) | O(4)-C(9)-C(8)    | 122.13(15) |
| N(2)-C(3)-C(5)   | 112.83(13) | C(10)-C(9)-C(8)   | 119.41(15) |
| C(2)-C(3)-C(5)   | 111.75(13) | C(11)-C(10)-C(9)  | 119.91(16) |
| N(2)-C(3)-C(12)  | 111.46(13) | C(11)-C(10)-H(10) | 120.0      |
| C(2)-C(3)-C(12)  | 107.32(12) | C(9)-C(10)-H(10)  | 120.0      |
| C(5)-C(3)-C(12)  | 111.28(13) | C(10)-C(11)-C(6)  | 121.73(15) |
| N(1)-C(4)-H(4A)  | 109.5      | C(10)-C(11)-H(11) | 119.1      |
| N(1)-C(4)-H(4B)  | 109.5      | C(6)-C(11)-H(11)  | 119.1      |
| H(4A)-C(4)-H(4B) | 109.5      | O(2)-C(12)-C(13)  | 112.20(13) |
| N(1)-C(4)-H(4C)  | 109.5      | O(2)-C(12)-C(3)   | 105.87(12) |
| H(4A)-C(4)-H(4C) | 109.5      | C(13)-C(12)-C(3)  | 112.35(13) |

|                   |            |                     |       |
|-------------------|------------|---------------------|-------|
| O(2)-C(12)-H(12)  | 108.8      | C(13)-C(18)-H(18)   | 119.4 |
| C(13)-C(12)-H(12) | 108.8      | O(2)-C(19)-H(19A)   | 109.5 |
| C(3)-C(12)-H(12)  | 108.8      | O(2)-C(19)-H(19B)   | 109.5 |
| C(14)-C(13)-C(18) | 118.15(15) | H(19A)-C(19)-H(19B) | 109.5 |
| C(14)-C(13)-C(12) | 120.76(14) | O(2)-C(19)-H(19C)   | 109.5 |
| C(18)-C(13)-C(12) | 121.08(14) | H(19A)-C(19)-H(19C) | 109.5 |
| C(13)-C(14)-C(15) | 121.36(15) | H(19B)-C(19)-H(19C) | 109.5 |
| C(13)-C(14)-H(14) | 119.3      | O(3)-C(20)-H(20A)   | 109.5 |
| C(15)-C(14)-H(14) | 119.3      | O(3)-C(20)-H(20B)   | 109.5 |
| C(14)-C(15)-C(16) | 119.68(15) | H(20A)-C(20)-H(20B) | 109.5 |
| C(14)-C(15)-H(15) | 120.2      | O(3)-C(20)-H(20C)   | 109.5 |
| C(16)-C(15)-H(15) | 120.2      | H(20A)-C(20)-H(20C) | 109.5 |
| O(3)-C(16)-C(15)  | 124.14(15) | H(20B)-C(20)-H(20C) | 109.5 |
| O(3)-C(16)-C(17)  | 116.17(15) | O(5)-C(21)-H(21A)   | 109.5 |
| C(15)-C(16)-C(17) | 119.69(15) | O(5)-C(21)-H(21B)   | 109.5 |
| C(18)-C(17)-C(16) | 119.87(15) | H(21A)-C(21)-H(21B) | 109.5 |
| C(18)-C(17)-H(17) | 120.1      | O(5)-C(21)-H(21C)   | 109.5 |
| C(16)-C(17)-H(17) | 120.1      | H(21A)-C(21)-H(21C) | 109.5 |
| C(17)-C(18)-C(13) | 121.23(15) | H(21B)-C(21)-H(21C) | 109.5 |
| C(17)-C(18)-H(18) | 119.4      |                     |       |

---

Symmetry transformations used to generate equivalent atoms:

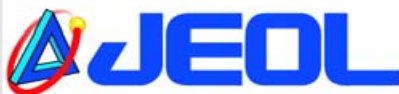

Filename = III\_p\_200\_inDMSO-3.jd  
Author = delta  
Experiment = single\_pulse.exp  
Sample\_id = S#470058  
Solvent = DMSO-D6  
Creation\_time = 26-FEB-2008 18:39:51  
Revision\_time = 7-JUL-2008 13:54:18  
Current\_time = 7-JUL-2008 13:54:58

Comment = Single Pulse Experi  
Data\_format = 1D COMPLEX  
Dim\_size = 16384  
Dim\_title = 1H  
Dim\_units = [ppm]  
Dimensions = X  
Site = Eclipse+ 500  
Spectrometer = DELTA\_NMR

Field\_strength = 11.7473579[T] (500[MH  
X\_acq\_duration = 2.1823488[s]  
X\_domain = 1H  
X\_freq = 500.15991521[MHz]  
X\_offset = 5[ppm]  
X\_points = 16384  
X\_prescans = 0  
X\_resolution = 0.45822189[Hz]  
X\_sweep = 7.50750751[kHz]  
Clipped = FALSE  
Mod\_return = 1  
Scans = 12  
Total\_scans = 12

X\_90\_width = 18.5[us]  
X\_acq\_time = 2.1823488[s]  
X\_angle = 45[deg]  
X\_pulse = 9.25[us]  
Initial\_wait = 1[s]  
Phase\_preset = 3[us]  
Recvr\_gain = 20  
Relaxation\_delay = 4[s]  
Temp\_get = 25.1[dC]  
Unblank\_time = 2[us]

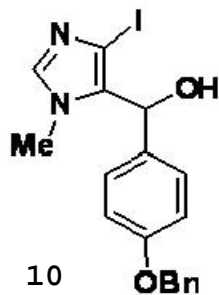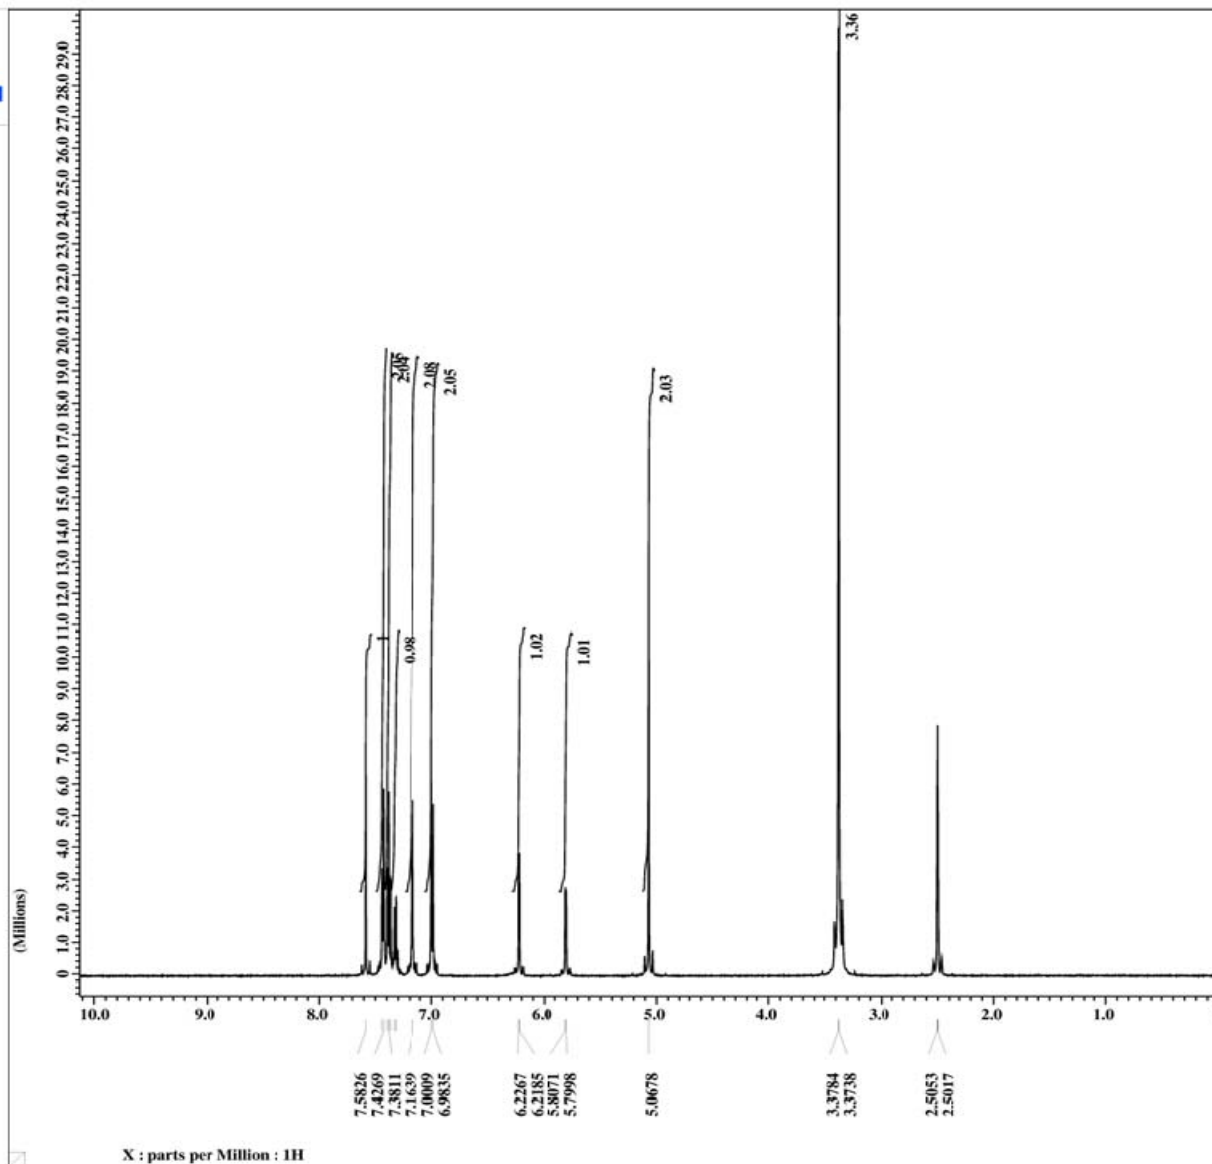

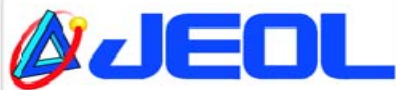

Filename = III\_p\_200\_inDMSO-2.jd  
Author = delta  
Experiment = single\_pulse\_dec  
Sample\_id = S#741288  
Solvent = DMSO-D6  
Creation\_time = 27-FEB-2008 11:14:26  
Revision\_time = 27-FEB-2008 09:29:53  
Current\_time = 7-JUL-2008 14:18:48  
  
Comment = single pulse decouple  
Data\_format = 1D COMPLEX  
Dim\_size = 65536  
Dim\_title = 13C  
Dim\_units = [ppm]  
Dimensions = X  
Site = Eclipse+ 500  
Spectrometer = DELTA\_NMR  
  
Field\_strength = 11.7473579[T] (500[MH  
X\_acq\_duration = 2.0840448[s]  
X\_domain = 13C  
X\_freq = 125.76529768 [MHz]  
X\_offset = 100 [ppm]  
X\_points = 65536  
X\_prescans = 4  
X\_resolution = 0.47983613 [Hz]  
X\_sweep = 31.44654088 [kHz]  
Irr\_domain = 1H  
Irr\_freq = 500.15991521 [MHz]  
Irr\_offset = 5 [ppm]  
Clipped = FALSE  
Mod\_return = 1  
Scans = 6400  
Total\_scans = 6400  
  
X\_90\_width = 14.2[us]  
X\_acq\_time = 2.0840448[s]  
X\_angle = 30[deg]  
X\_pulse = 4.73333333[us]  
Initial\_wait = 1[s]  
Noe\_time = 1[s]  
Phase\_preset = 3[us]  
Recvr\_gain = 29  
Relaxation\_delay = 2[s]  
Temp\_get = 26.4[dC]  
Unblank\_time = 2[us]

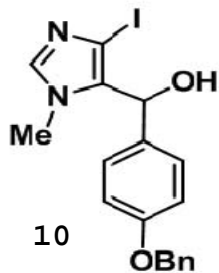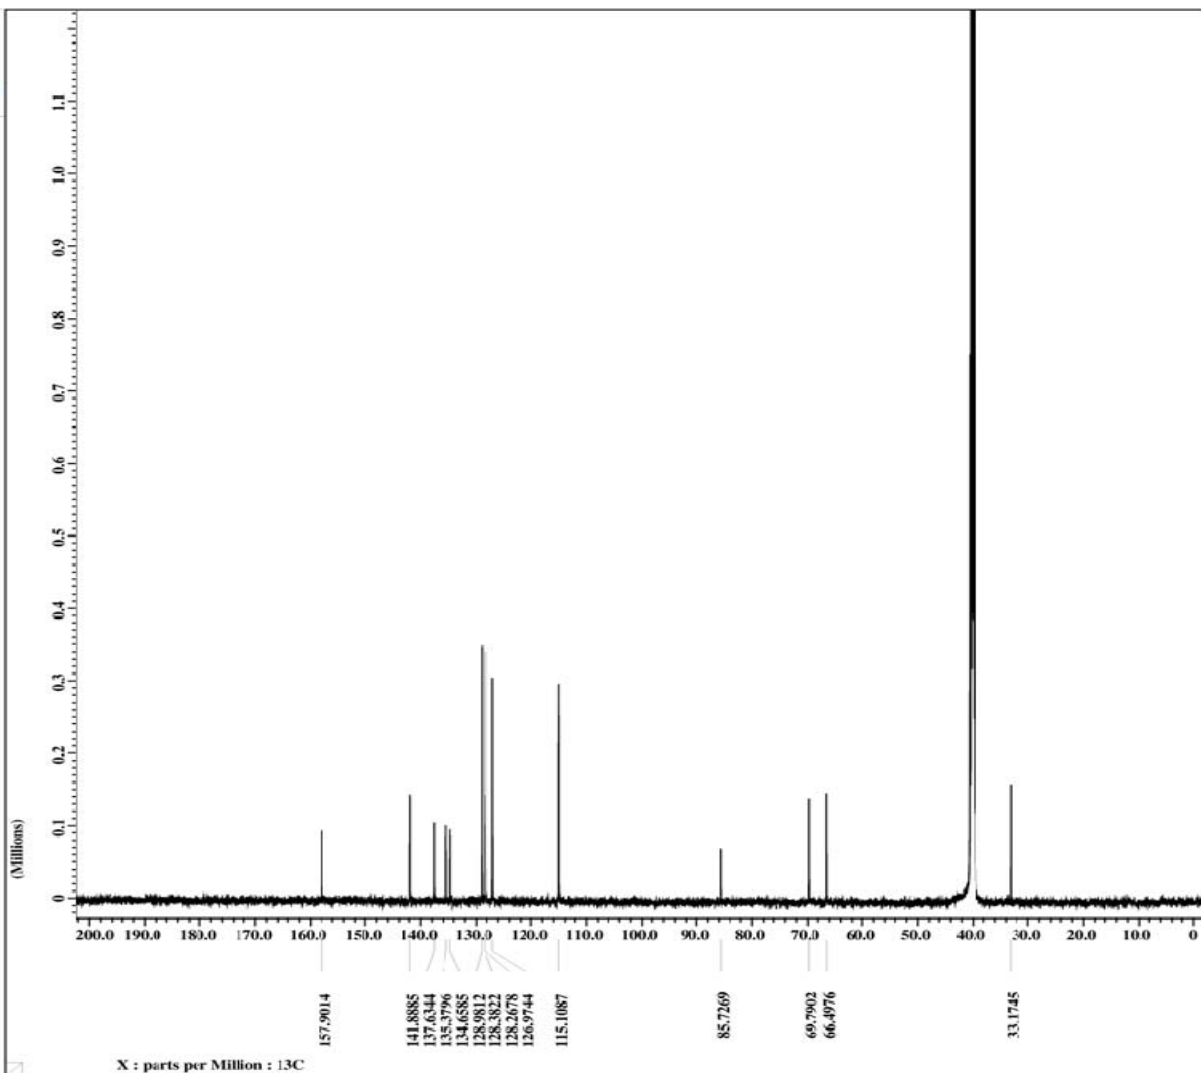

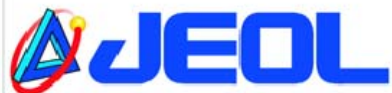

Filename = III\_p\_208-2.jdf  
Author = delta  
Experiment = single\_pulse.exp  
Sample\_id = S8554131  
Solvent = CHLOROFORM-D  
Creation\_time = 28-FEB-2008 21:01:47  
Revision\_time = 7-JUL-2008 14:27:26  
Current\_time = 7-JUL-2008 14:27:44

Comment = Single Pulse Experime  
Data\_format = 1D COMPLEX  
Dim\_size = 16384  
Dim\_title = 1H  
Dim\_units = [ppm]  
Dimensions = X  
Site = Eclipse+ 500  
Spectrometer = DELTA\_NMR

Field\_strength = 11.7473579[T] (500[MH  
X\_acq\_duration = 2.1823488[s]  
X\_domain = 1H  
X\_freq = 500.15991521[MHz]  
X\_offset = 5[ppm]  
X\_points = 16384  
X\_prescans = 0  
X\_resolution = 0.45822189[Hz]  
X\_sweep = 7.50750751[kHz]  
Clipped = FALSE  
Mod\_return = 1  
Scans = 12  
Total\_scans = 12

X\_90\_width = 18.5[us]  
X\_acq\_time = 2.1823488[s]  
X\_angle = 45[deg]  
X\_pulse = 9.25[us]  
Initial\_wait = 1[s]  
Phase\_preset = 3[us]  
Recvr\_gain = 18  
Relaxation\_delay = 4[s]  
Temp\_get = 25.1[dC]  
Unblank\_time = 2[us]

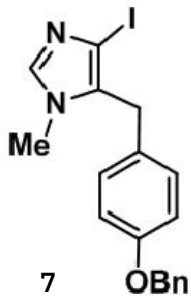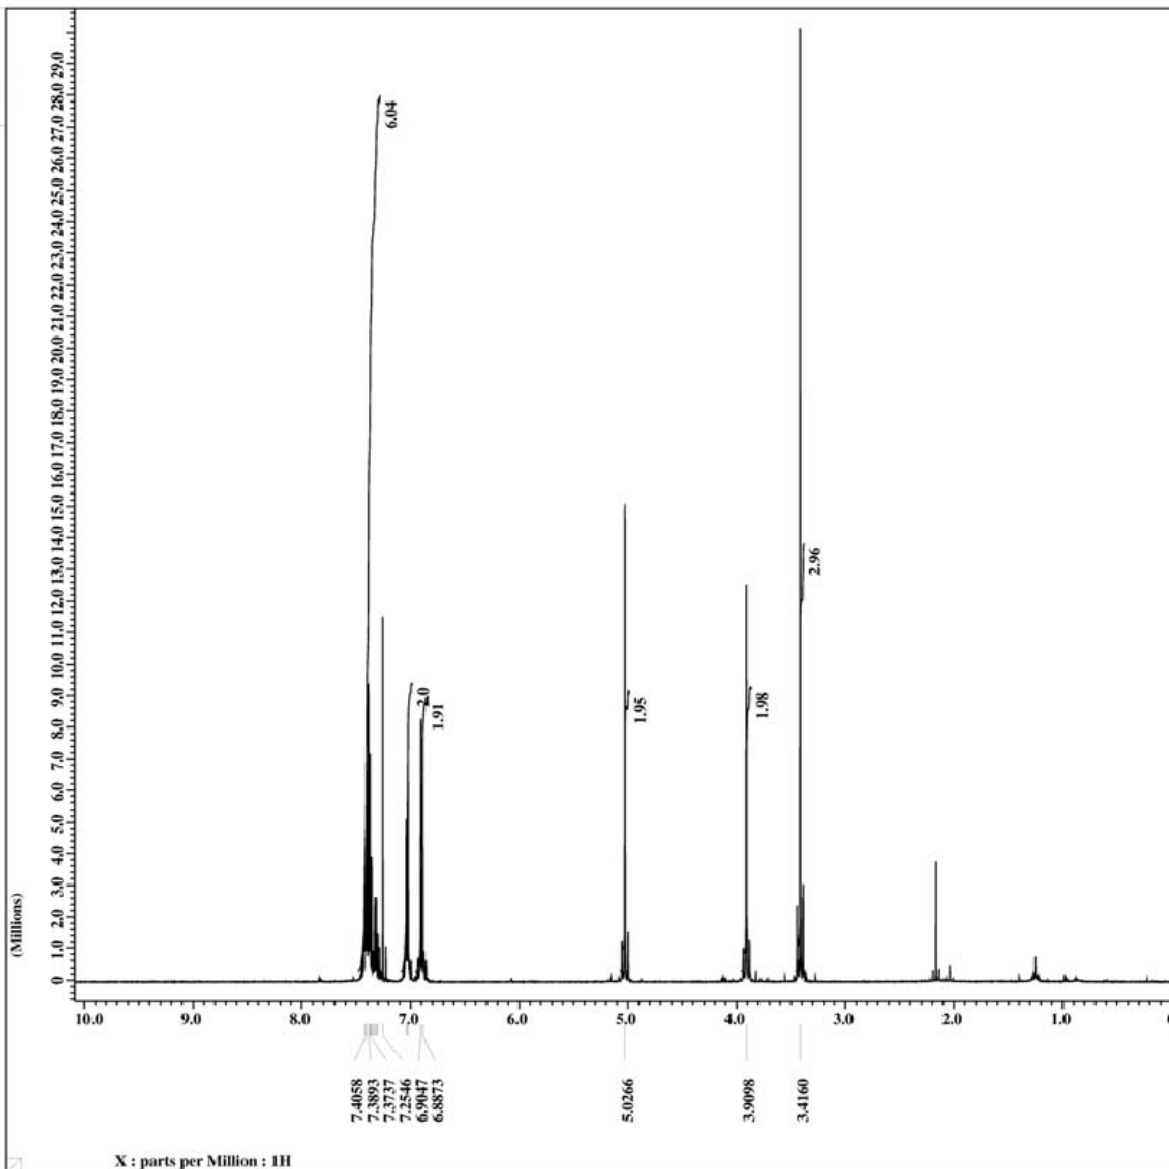

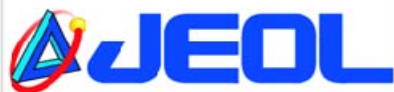

Filename = III\_p\_206-2.;df  
Author = delta  
Experiment = single\_pulse\_dec  
Sample\_id = S#555285  
Solvent = CHLOROFORM-D  
Creation\_time = 28-FEB-2008 23:16:49  
Revision\_time = 28-FEB-2008 17:35:20  
Current\_time = 7-JUL-2008 14:33:28

Comment = single pulse decouple  
Data\_format = 1D COMPLEX  
Dim\_size = 65536  
Dim\_title = 13C  
Dim\_units = [ppm]  
Dimensions = X  
Site = Eclipse+ 500  
Spectrometer = DELTA\_NMR

Field\_strength = 11.7473579[T] (500[MH  
K\_acq\_duration = 2.084044[s]  
K\_domain = 13C  
K\_freq = 125.76529768[MHz]  
K\_offset = 100[ppm]  
K\_points = 65536  
K\_prescans = 4  
K\_resolution = 0.47983613[Hz]  
K\_sweep = 31.44654088[kHz]  
Irr\_domain = 1H  
Irr\_freq = 500.15991521[MHz]  
Irr\_offset = 5[ppm]  
Clipped = FALSE  
Mod\_return = 1  
Scans = 1500  
Total\_scans = 1500

K\_90\_width = 14.2[us]  
K\_acq\_time = 2.084044[s]  
K\_angle = 30[deg]  
K\_pulse = 4.73333333[us]  
initial\_wait = 1[s]  
Noe\_time = 1[s]  
Phase\_preset = 3[us]  
Recvr\_gain = 30  
Relaxation\_delay = 2[s]  
Temp\_get = 26.4[dC]  
Unblank\_time = 2[us]

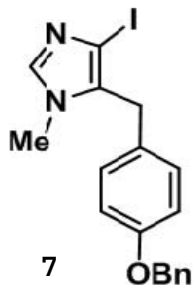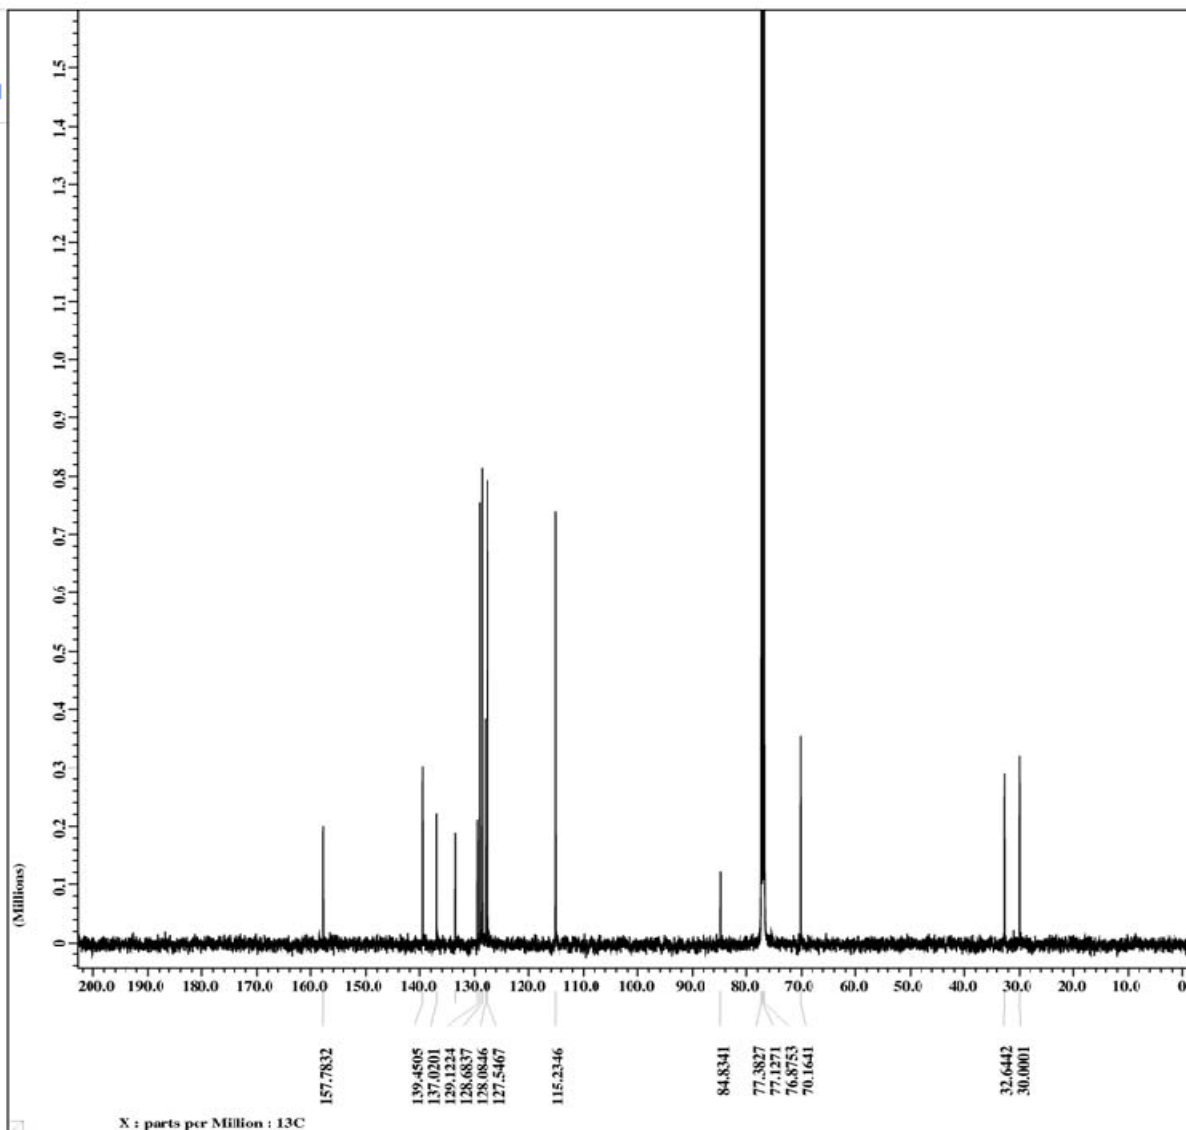

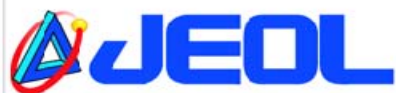

Filename = III\_p\_272\_EnCHO-2.jdf  
Author = delta  
Experiment = single\_pulse.ex2  
Sample\_id = S#766860  
Solvent = CHLOROFORM-D  
Creation\_time = 13-APR-2008 21:30:23  
Revision\_time = 13-APR-2008 21:22:09  
Current\_time = 7-JUL-2008 15:05:50  
  
Comment = single\_pulse  
Data\_format = 1D COMPLEX  
Dim\_size = 13107  
Dim\_title = 1H  
Dim\_unit:s = [ppm]  
Dimensions = X  
Site = ECX 300  
Spectrometer = DELTA2\_NMR  
  
Field\_strength = 7.0586013[T] (300[MHz])  
X\_acq\_duration = 3.63331584[s]  
X\_domain = 1H  
X\_freq = 300.52965552[MHz]  
X\_offset = 5[ppm]  
X\_points = 16394  
X\_prescans = 0  
X\_resolution = 0.27523068[Hz]  
X\_sweep = 4.50937951[kHz]  
Irr\_domain = 1H  
Irr\_freq = 300.52965552[MHz]  
Irr\_offset = 5[ppm]  
Tri\_domain = 1H  
Tri\_freq = 300.52965552[MHz]  
Tri\_offset = 5[ppm]  
Clipped = FALSE  
Mod\_return = 1  
Scans = 12  
Total\_scans = 12  
  
X\_90\_width = 13.01[us]  
X\_acq\_time = 3.63331584[s]  
X\_angle = 45[deg]  
X\_atn = 4[db]  
X\_pulse = 6.505[us]  
Irr\_mode = Off  
Tri\_mode = Off  
Dante\_presat = FALSE  
Initial\_wait = 1[s]  
Recvr\_gain = 46  
Relaxation\_delay = 5[s]  
Repetition\_time = 8.63331584[s]  
Temp\_gc: = 23.0[degC]

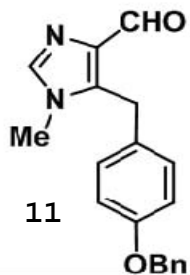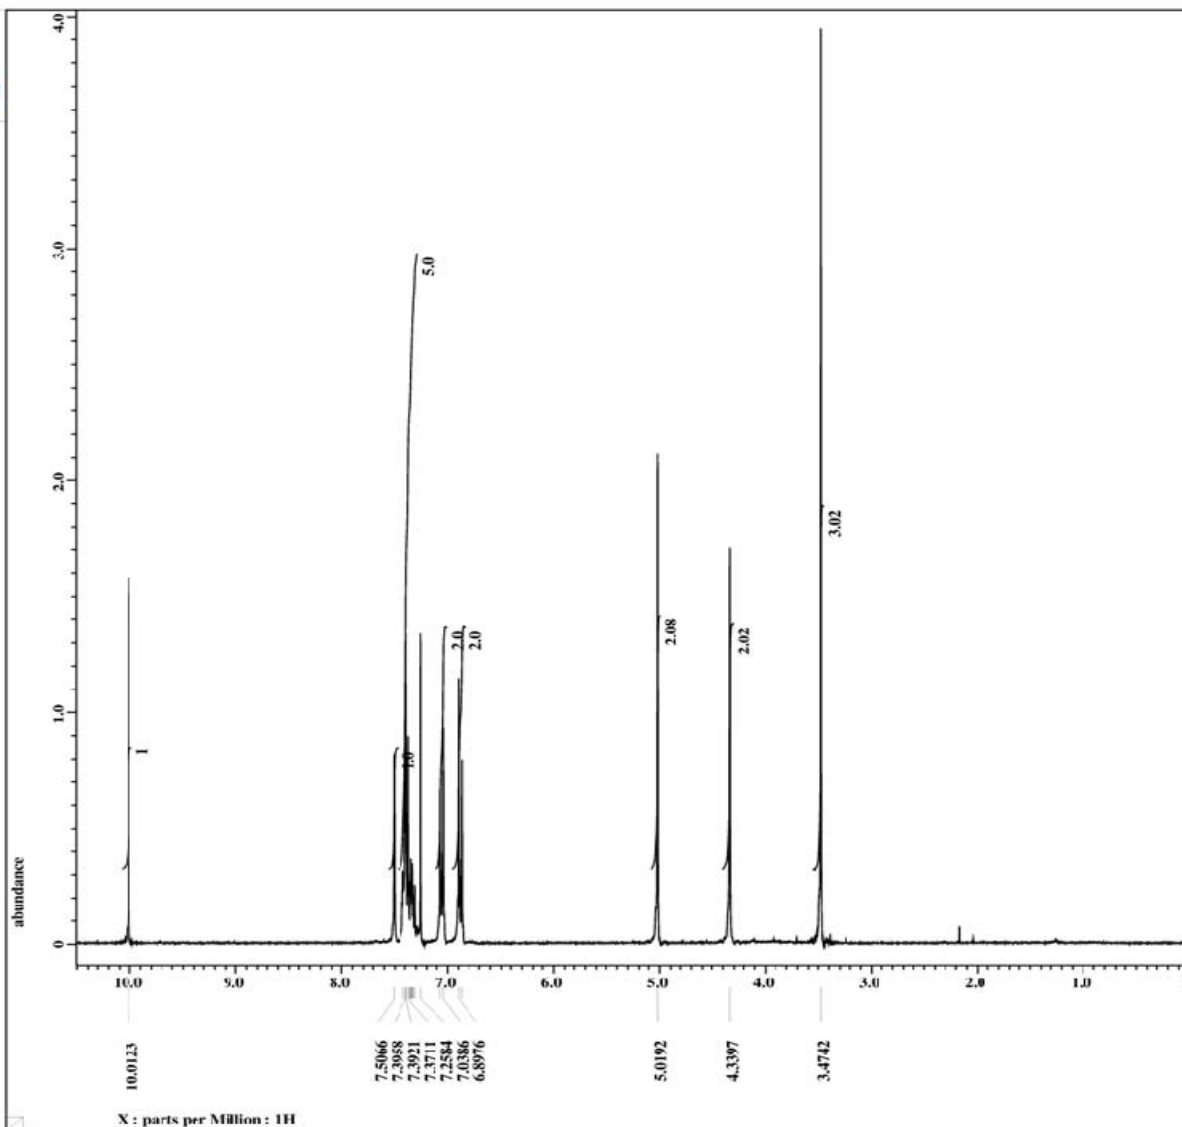



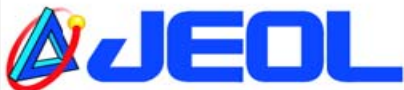

Filename = III\_p\_272\_BnCHC-3.jdf  
Author = delta  
Experiment = single\_pulse\_dec  
Sample\_id = S#768189  
Solvent = CHLOROFORM-D  
Creation\_time = 14-APR-2008 05:59:26  
Revision\_time = 7-JUL-2008 15:09:34  
Current\_time = 7-JUL-2008 15:10:05

Comment = single pulse decouple  
Data\_format = 1D COMPLEX  
Dim\_size = 52428  
Dim\_title = 13C  
Dim\_units = [ppm]  
Dimensions = X  
Site = ECX 300  
Spectrometer = DELTA2\_NMR

Field\_strength = 7.0586013[T] (300[MHz])  
X\_acq\_duration = 2.76824064[s]  
X\_domain = 13C  
X\_freq = 75.56823426[MHz]  
X\_offset = 100[ppm]  
X\_points = 65536  
X\_prescans = 4  
X\_resolution = 0.36124027[Hz]  
X\_sweep = 23.67424242[kHz]  
Irr\_domain = 1H  
Irr\_freq = 300.52965592[MHz]  
Irr\_offset = 5[ppm]  
Clipped = FALSE  
Mod\_return = 10  
Scans = 6400  
Total\_scans = 6400

X\_90\_width = 9.75[us]  
X\_acq\_time = 2.76824064[s]  
X\_angle = 30[deg]  
X\_atn = 8[dB]  
X\_pulse = 3.25[us]  
Irr\_atn\_dec = 25[dB]  
Irr\_atn\_noe = 25[dB]  
Irr\_ncise = WALTZ  
Decoupling = TRUE  
Initial\_wait = 1[s]  
Noe = TRUE  
Noe\_time = 2[s]  
Recvr\_gain = 50  
Relaxation\_delay = 2[s]  
Repetition\_time = 4.76824064[s]  
Temp\_get = 23.5[dC]

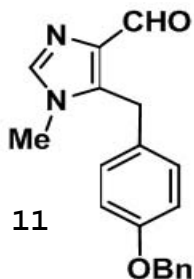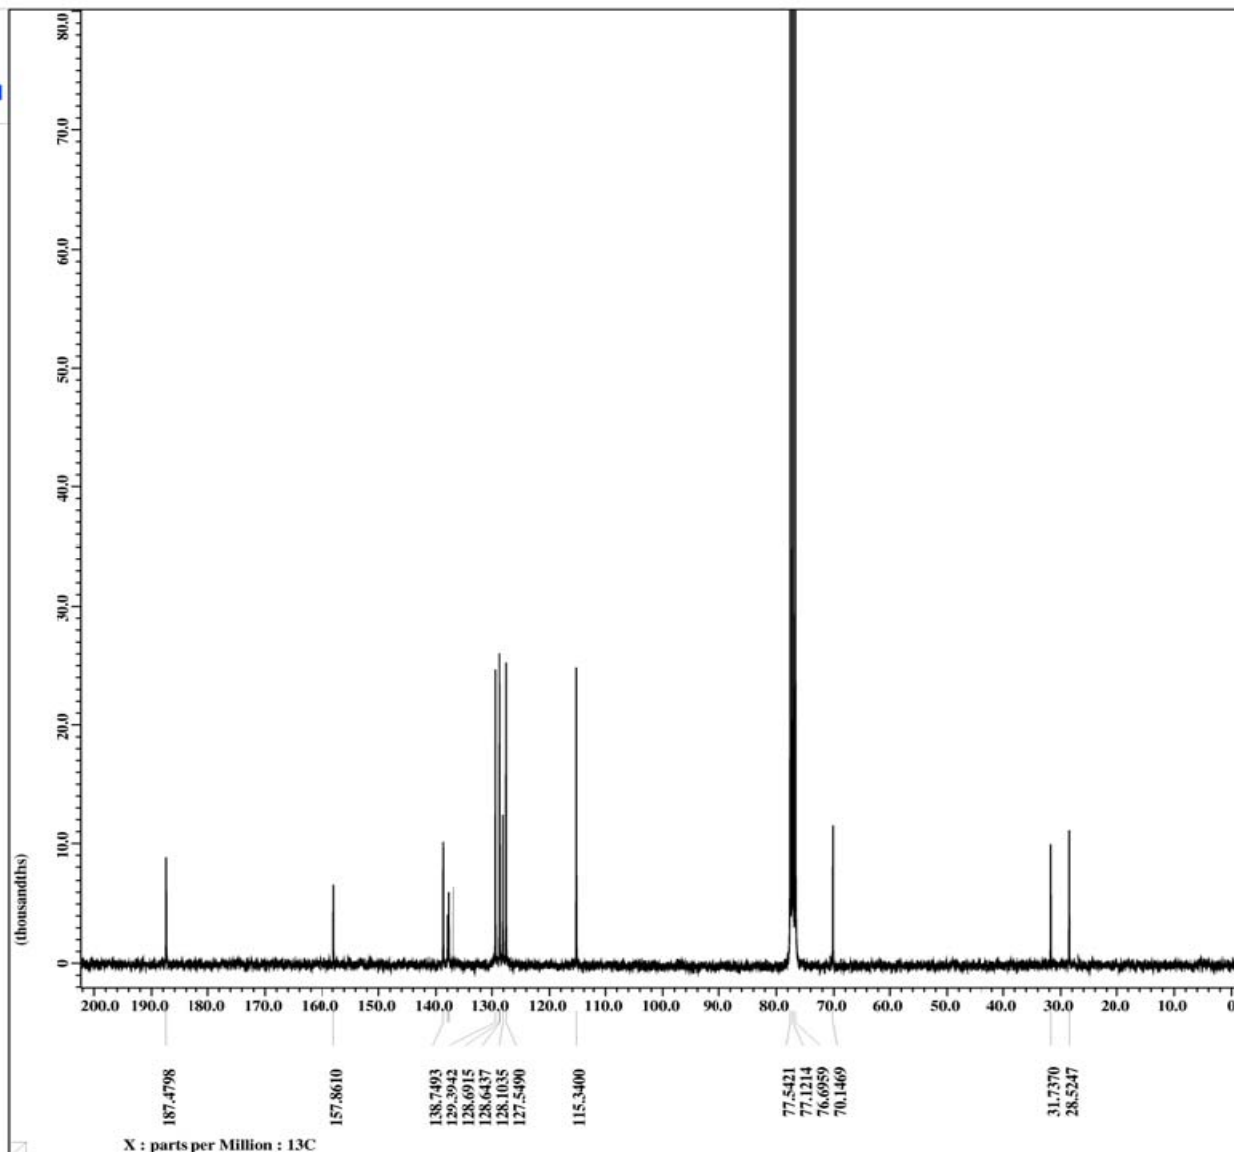



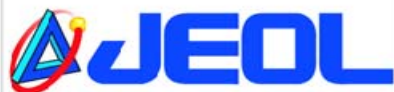

Filename = III\_p\_28cpura-2.jdf  
Author = delta  
Experiment = single\_pulse\_dec  
Sample\_id = S#642668  
Solvent = CHLOROFORM-D  
Creation\_time = 15-APR-2008 20:08:53  
Revision\_time = 15-APR-2008 20:04:40  
Current\_time = 7-JUL-2008 15:15:05

Comment = single\_pulse decouple  
Data\_format = 1D COMPLEX  
Dim\_size = 52428  
Dim\_title = 13C  
Dim\_units = [ppm]  
Dimensions = X  
Site = ECX 300  
Spectrometer = DELTA2\_NMR

Field\_strength = 7.0586013[T] (300[MHz])  
K\_acq\_duration = 2.76824064[s]  
K\_domain = 13C  
K\_freq = 75.56823426[MHz]  
K\_offset = 100[ppm]  
K\_points = 65536  
K\_prescans = 4  
K\_resolution = 0.36124027[Hz]  
K\_sweep = 23.67424142[kHz]  
Irr\_domain = 1H  
Irr\_freq = 300.5296592[MHz]  
Irr\_offset = 5[ppm]  
Clipped = FALSE  
Mod\_return = 10  
Scans = 1600  
Total\_scans = 1600

K\_90\_width = 9.75[us]  
K\_acq\_time = 2.76824064[s]  
K\_angle = 30[deg]  
K\_atn = 8[dB]  
K\_pulse = 3.25[us]  
Irr\_atn\_dec = 25[dB]  
Irr\_atn\_noe = 25[dB]  
Irr\_noise = WALTZ  
Decoupling = TRUE  
Initial\_wait = 1[s]  
Noe = TRUE  
Noe\_time = 2[s]  
Recvr\_gain = 50  
Relaxation\_delay = 2[s]  
Repetition\_time = 4.76824064[s]  
Temp\_get = 23.3[dc]

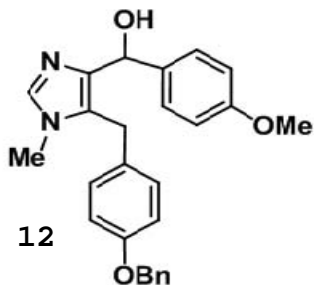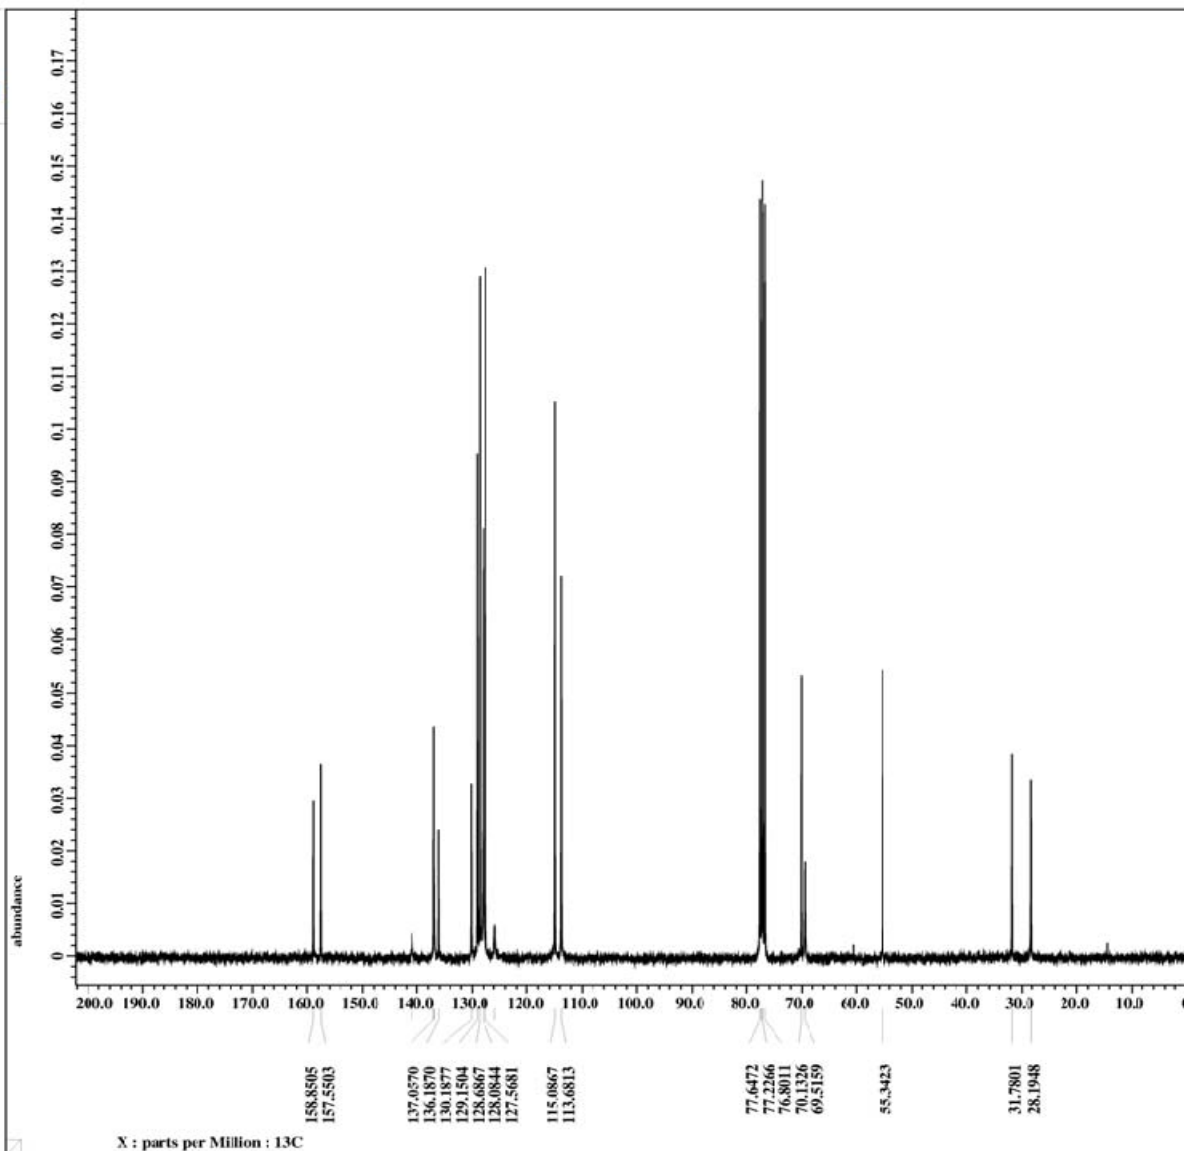

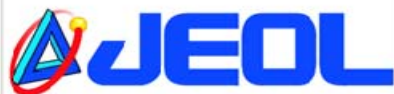

Filename = III\_p\_228\_sm-2.jdf  
 Author = delta  
 Experiment = single\_pulse.ex2  
 Sample\_id = S4795720  
 Solvent = CHLOROFORM-D  
 Creation\_time = 15-MAR-2008 20:17:51  
 Revision\_time = 15-MAR-2008 22:12:25  
 Current\_time = 7-JUL-2008 15:27:37

Comment = single\_pulse  
 Data\_format = 1D\_COMPLEX  
 Dim\_size = 13107  
 Dim\_title = 1H  
 Dim\_units = [ppm]  
 Dimensions = X  
 Site = ECX 300  
 Spectrometer = DELTA2\_NMR

Field\_strength = 7.0586013[T] (300[MHz])  
 X\_acq\_duration = 3.63331584[s]  
 X\_domain = 1H  
 X\_freq = 300.52965592[MHz]  
 X\_offset = 5[ppm]  
 X\_points = 16384  
 X\_prescans = 0  
 X\_resolution = 0.27523068[Hz]  
 X\_sweep = 4.50937951[kHz]  
 Irr\_domain = 1H  
 Irr\_freq = 300.52965592[MHz]  
 Irr\_offset = 5[ppm]  
 Tri\_domain = 1H  
 Tri\_freq = 300.52965592[MHz]  
 Tri\_offset = 5[ppm]  
 Clipped = FALSE  
 Mod\_return = 1  
 Scans = 12  
 Total\_scans = 12

X\_90\_width = 13.01[us]  
 X\_acq\_time = 3.63331584[s]  
 X\_angle = 45[deg]  
 X\_atn = 4[dB]  
 X\_pulse = 6.505[us]  
 Irr\_mode = Off  
 Tri\_mode = Off  
 Dants\_presat = FALSE  
 Initial\_wait = 1[s]  
 Recvr\_gain = 30  
 Relaxation\_delay = 5[s]  
 Repetition\_time = 8.63331584[s]  
 Temp\_get = 22.7[dC]

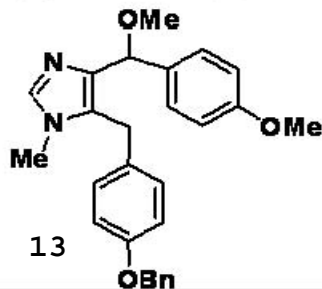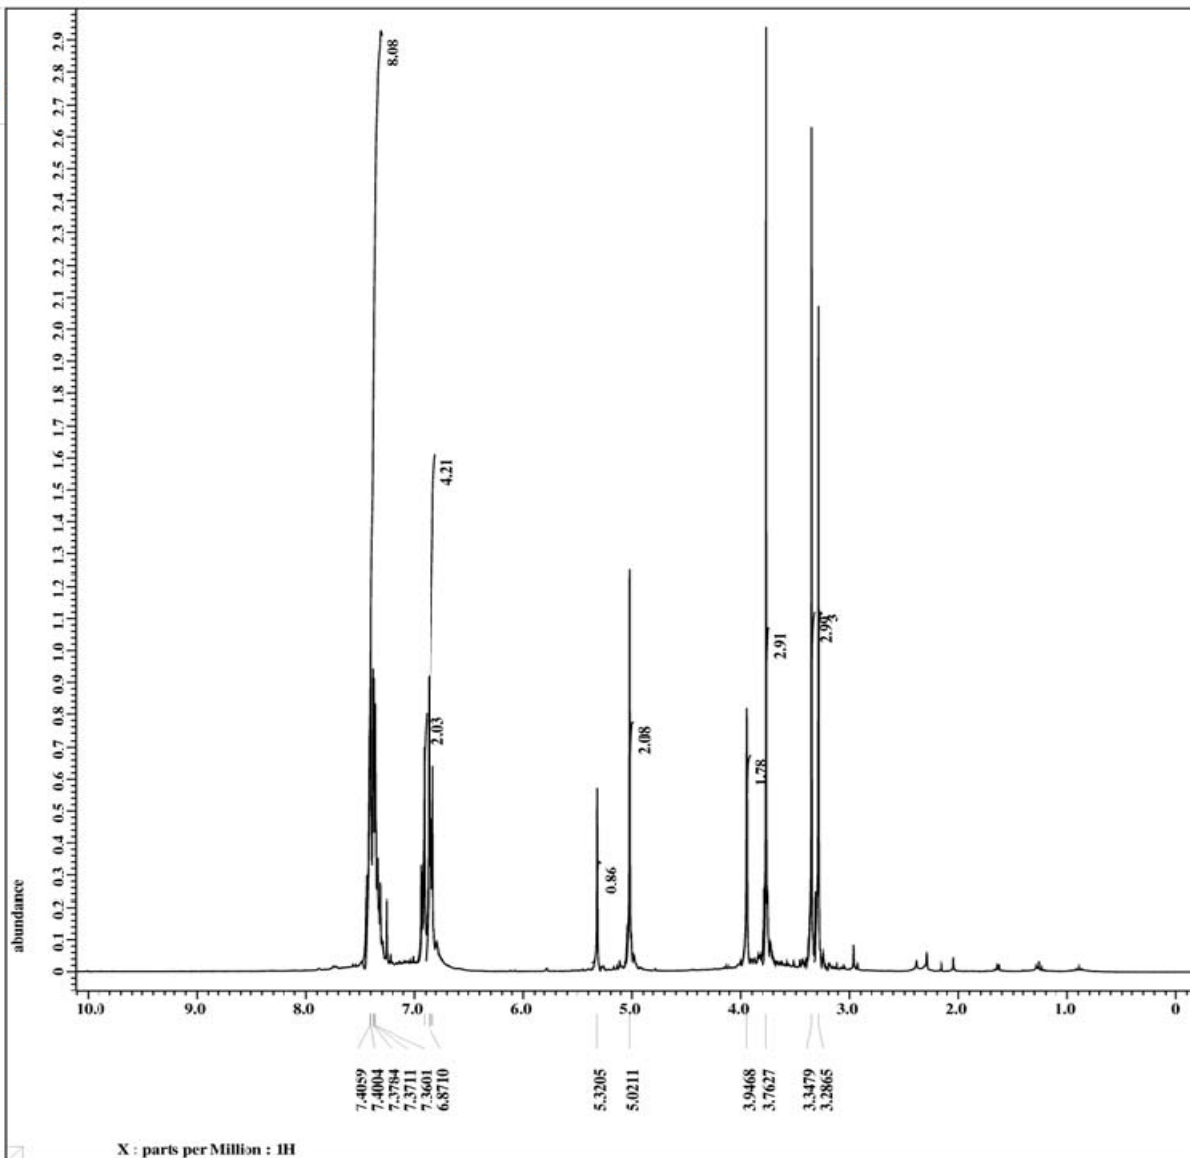



```

Filename      = III_p_228_sm-2.jdf
Author       = delta
Experiment   = single_pulse_dec
Sample_id    = S4797179
Solvent      = CHLOROFORM-D
Creation_time = 15-MAR-2008 21:12:27
Revision_time = 15-MAR-2008 23:05:46
Current_time  = 7-JUL-2008 15:30:44

Comment      = single pulse decouple
Data_format  = 1D COMPLEX
Dim_size     = 52428
Dim_title    = 13C
Dim_units    = [ppm]
Dimensions   = X
Site         = ECX 300
Spectrometer = DELTA2 NMR

Field_strength = 7.0586013[T] (300[MHz])
X_acq_duration = 2.76824064[s]
X_domain       = 13C
X_freq         = 75.56823426[MHz]
X_offset       = 100[ppm]
X_points       = 65536
X_prescans     = 4
X_resolution   = 0.36124027[Hz]
X_sweep        = 23.67424242[kHz]
Irr_domain     = 1H
Irr_freq       = 300.52965592[MHz]
Irr_offset     = 5[ppm]
Clipped        = FALSE
Mod_return     = 10
Scans          = 680
Total_scans    = 680

X_90_width    = 9.75[us]
X_acq_time     = 2.76824064[s]
X_angle       = 30[deg]
X_atn         = 8[db]
X_pulse       = 3.25[us]
Irr_atn_dec   = 25[db]
Irr_atn_noe   = 25[db]
Irr_noise     = WALTZ
Decoupling    = TRUE
Initial_wait  = 1[s]
Noe           = TRUE
Noe_time      = 2[s]
Recvr_gain    = 50
Relaxation_delay = 2[s]
Repetition_time = 4.76824064[s]
Temp_get      = 22.7[dC]
  
```

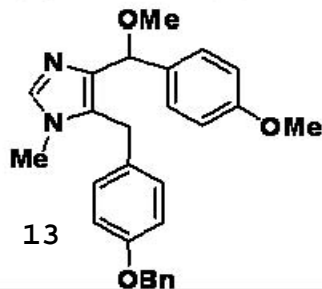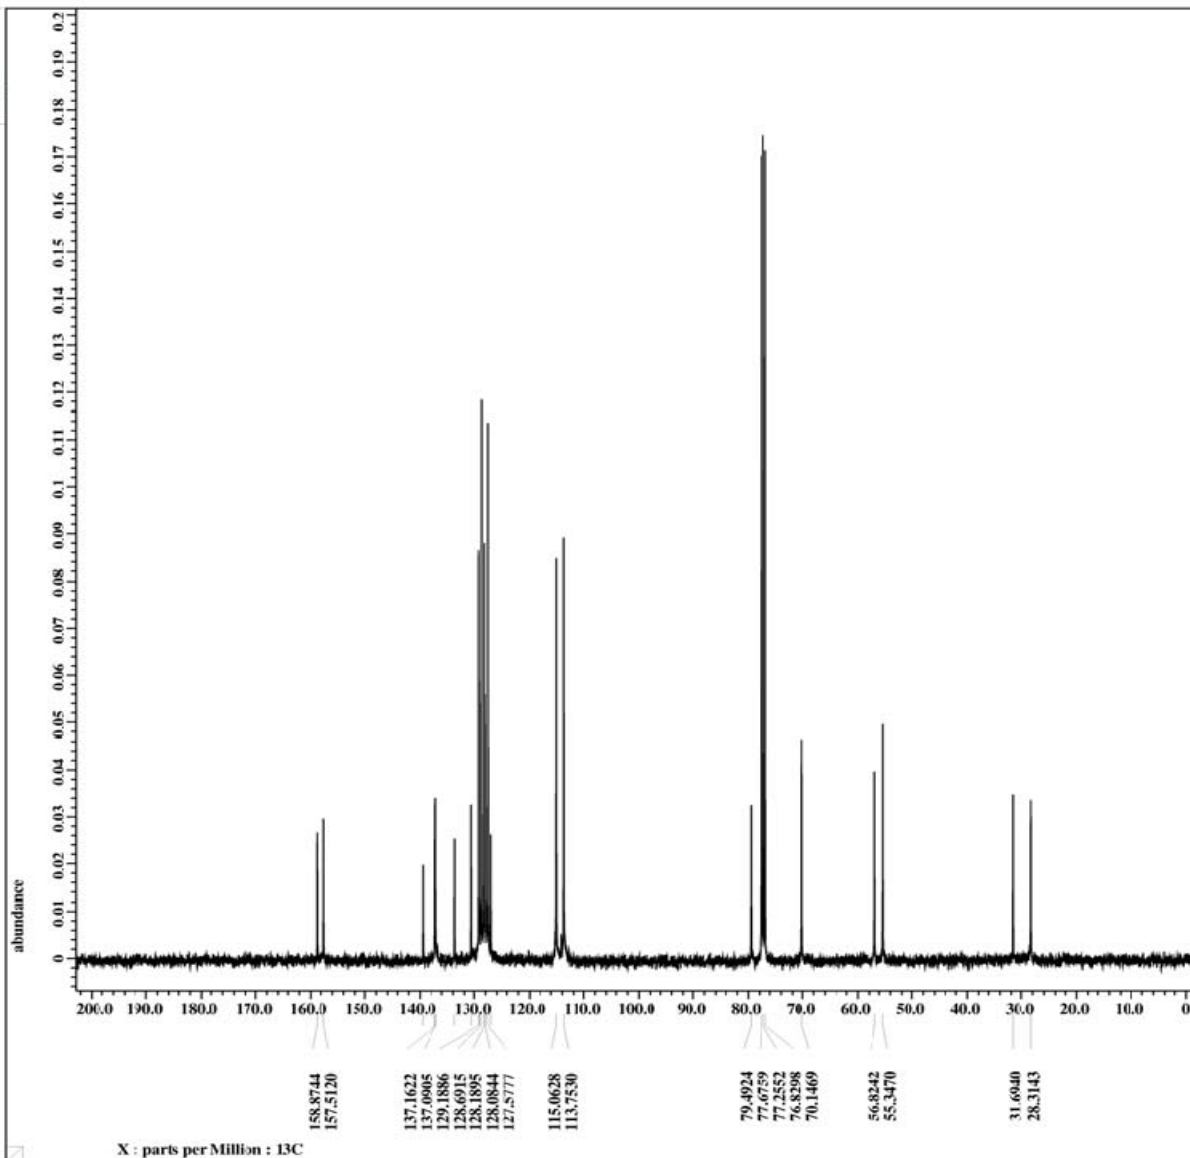

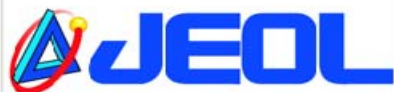

Filename = III\_p\_284\_azide-2.jdf  
Author = delta  
Experiment = single\_pulse.ex2  
Sample\_id = S#445512  
Solvent = CHLOROFORM-D  
Creation\_time = 18-APR-2003 12:35:18  
Revision\_time = 18-APR-2003 12:26:35  
Current\_time = 7-JUL-2003 15:35:02

Comment = single\_pulse  
Data\_format = 1D\_COMPLEX  
Dim\_size = 13107  
Dim\_title = 1H  
Dim\_units = [ppm]  
Dimensions = X  
Site = ECK 300  
Spectrometer = DELTA2\_NMR

Field\_strength = 7.0586013[T] (300[NHz])  
X\_acq\_duration = 3.63331584[s]  
X\_domain = 1H  
X\_freq = 300.52965592[MHz]  
X\_offset = 5[ppm]  
X\_points = 16384  
X\_prescans = 0  
X\_resolution = 0.27523068[Hz]  
X\_sweep = 4.50937951[kHz]  
Irr\_domain = 1H  
Irr\_freq = 300.52965592[MHz]  
Irr\_offset = 5[ppm]  
Tri\_domain = 1H  
Tri\_freq = 300.52965592[MHz]  
Tri\_offset = 5[ppm]  
Clipped = FALSE  
Mod\_return = 1  
Scans = 12  
Total\_scans = 12

X\_90\_width = 13.01[us]  
X\_acq\_time = 3.63331584[s]  
X\_angle = 45[deg]  
X\_atn = 4[dB]  
X\_pulse = 6.505[us]  
Irr\_mode = Off  
Tri\_mode = Off  
Dante\_preset = FALSE  
Initial\_wait = 1[s]  
Recvr\_gain = 30  
Relaxation\_delay = 5[s]  
Repetition\_time = 8.63331584[s]  
Temp\_get = 22.6[dc]

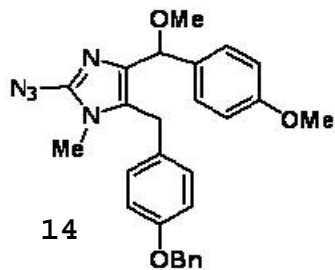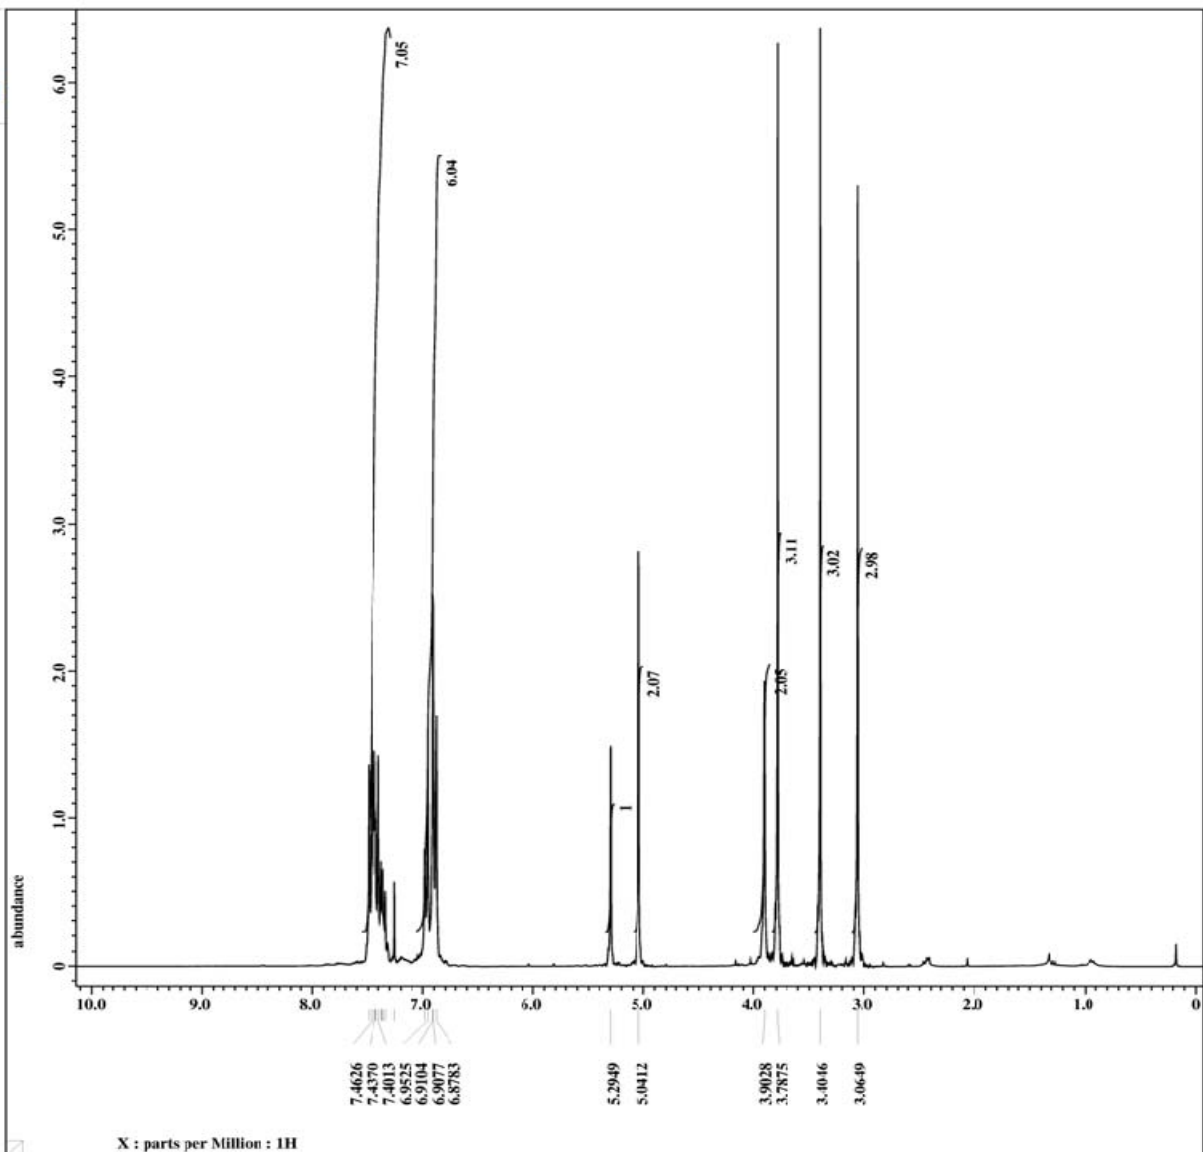

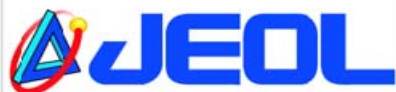

Filename = III\_p\_284\_azide-2.jdf  
Author = delta  
Experiment = single\_pulse\_dec  
Sample\_id = S#446354  
Solvent = CHLOROFORM-D  
Creation\_time = 18-APR-2008 12:44:28  
Revision\_time = 18-APR-2008 12:34:15  
Current\_time = 7-JUL-2008 15:45:31

Comment = single\_pulse decouple  
Data\_format = 1D COMPLEX  
Dim\_size = 52428  
Dim\_title = 13C  
Dim\_units = [ppm]  
Dimensions = X  
Site = ECK 300  
Spectrometer = DELTA2\_NMR

Field\_strength = 7.0586013[T] (300[MHz]  
X\_acq\_duration = 2.76824064[s]  
X\_domain = 13C  
X\_freq = 75.56823426 [MHz]  
X\_offset = 100 [ppm]  
X\_points = 65536  
X\_prescans = 4  
X\_resolution = 0.36124027 [Hz]  
X\_sweep = 23.67424242 [kHz]  
Irr\_domain = 1H  
Irr\_freq = 300.52965592 [MHz]  
Irr\_offset = 5 [ppm]  
Clipped = FALSE  
Mod\_return = 10  
Scans = 110  
Total\_scans = 110

X\_90\_width = 9.75 [us]  
X\_acq\_time = 2.76824064 [s]  
X\_angle = 30 [deg]  
X\_atn = 8 [dB]  
X\_pulse = 3.25 [us]  
Irr\_atn\_dec = 25 [dB]  
Irr\_atn\_noe = 25 [dB]  
Irr\_noise = WALTZ  
Decoupling = TRUE  
Initial\_wait = 1 [s]  
Noe = TRUE  
Noe\_time = 2 [s]  
Recvr\_gain = 50  
Relaxation\_delay = 2 [s]  
Repetition\_time = 4.76824064 [s]  
Temp\_get = 22.8 [dC]

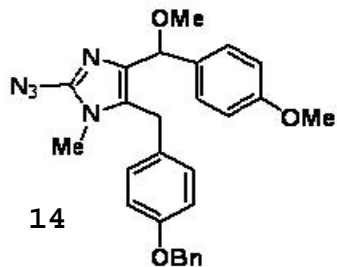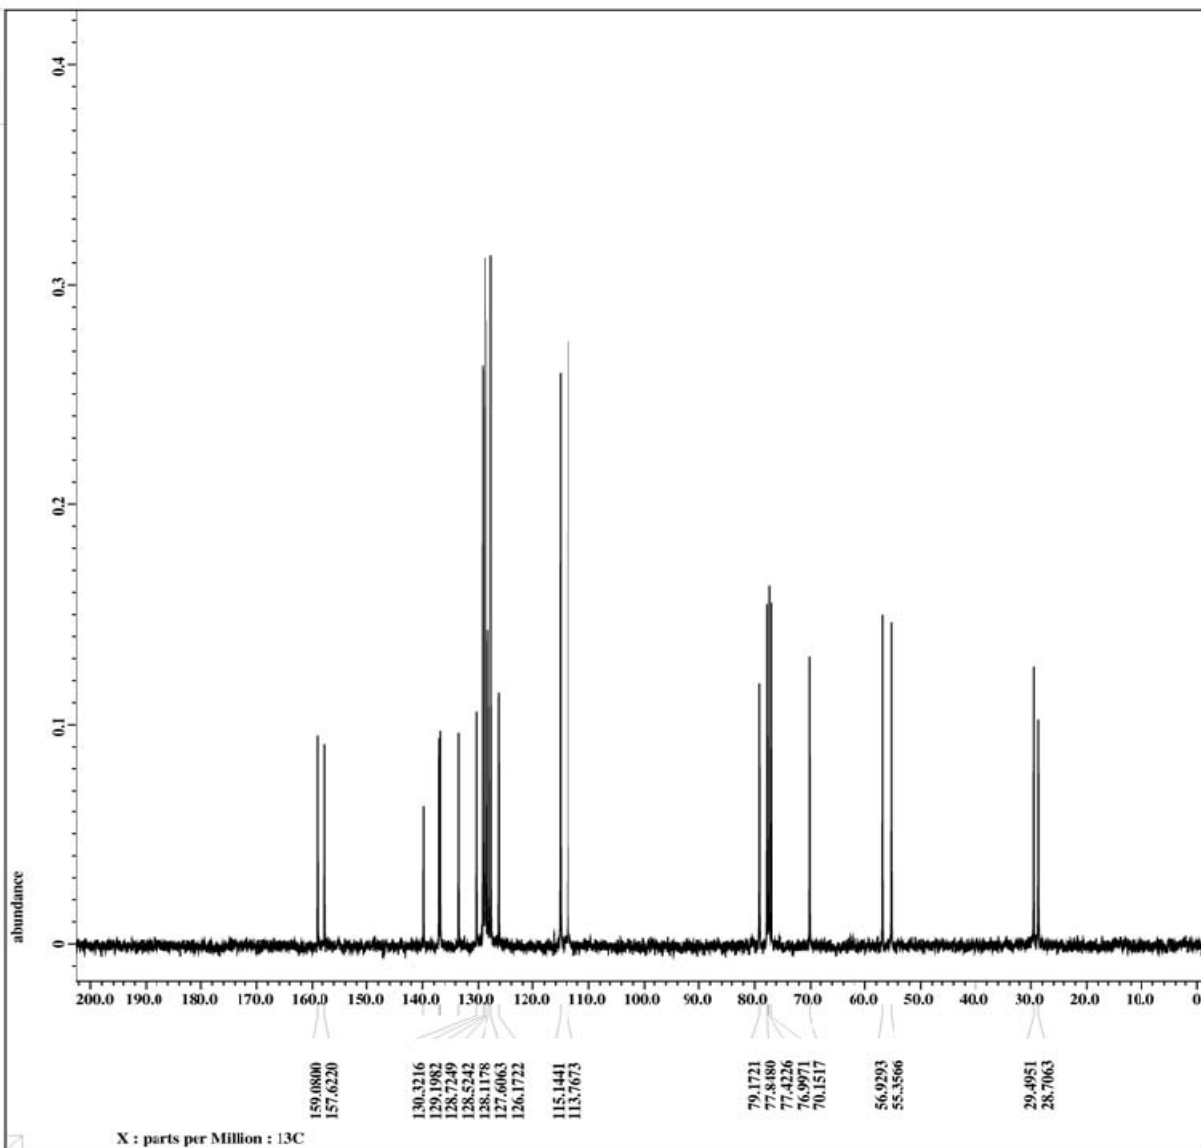

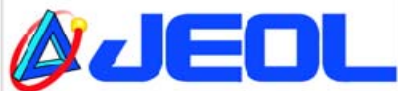

```

Filename      = IIX_p_065_amine-3.jdf
Author       = delta
Experiment   = single_pulse.ex2
Sample_id    = S1701386
Solvent      = METHANOL-D3
Creation_time = 19-NOV-2007 19:52:28
Revision_time = 9-JUL-2008 14:29:14
Current_time  = 9-JUL-2008 14:30:50

Comment      = single_pulse
Data_format  = 1D_COMPLEX
Dim_size     = 13107
Dim_title    = 1H
Dim_units    = [ppm]
Dimensions   = X
Site         = ECX 300
Spectrometer = DELTA2_NMR

Field_strength = 7.0586013[T] (300[MHz]
X_acq_duration = 3.63331584[s]
K_domain      = 1H
X_freq       = 300.52965592[MHz]
X_offset     = 5[ppm]
X_points     = 16384
X_prescans   = 0
X_resolution = 0.27523068[Hz]
X_sweep      = 4.50937951[kHz]
Irr_domain   = 1H
Irr_freq     = 300.52965592[MHz]
Irr_offset   = 5[ppm]
Tri_domain   = 1H
Tri_freq     = 300.52965592[MHz]
Tri_offset   = 5[ppm]
Clipped      = FALSE
Mod_return   = 1
Scans        = 12
Total_scans  = 12

X_90_width   = 13.01[us]
X_acq_time   = 3.63331584[s]
X_angle      = 45[deg]
X_atn        = 4[db]
X_pulse      = 6.505[us]
Irr_mode     = Off
Tri_mode     = Off
Dante_presat = FALSE
Initial_wait = 1[s]
Recvr_gain   = 36
Relaxation_delay = 5[s]
Repetition_time = 8.63331584[s]
Temp_get     = 23.3[dC]
  
```

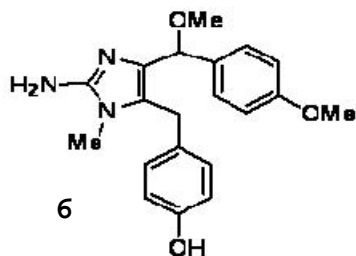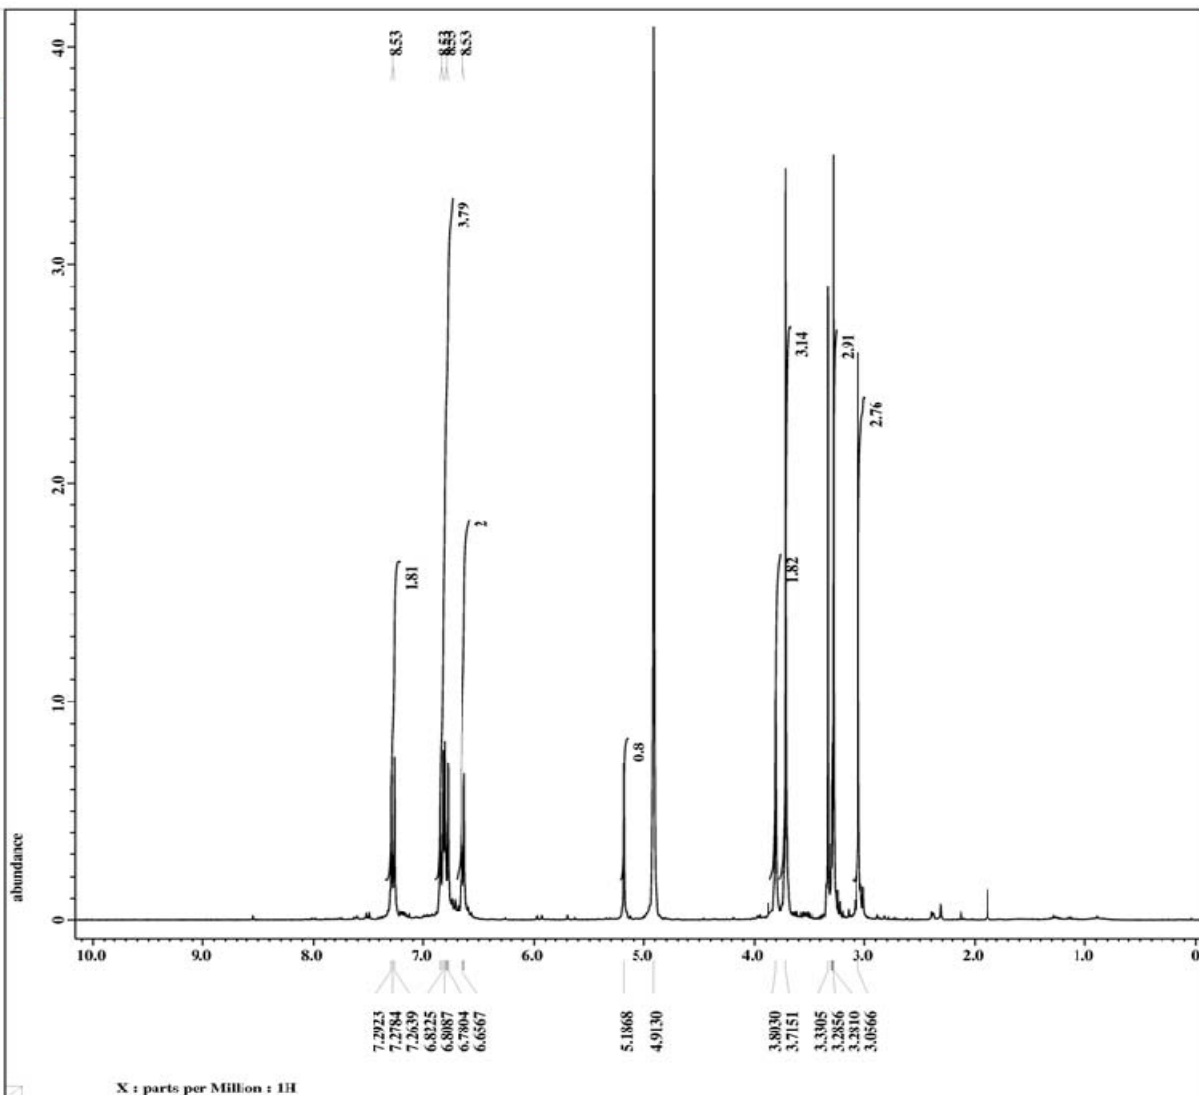



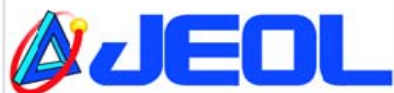

```

Filename      = III_p_065_anine-3.jdf
Author       = delta
Experiment    = single_pulse_dec
Sample_id     = SF703079
Solvent      = METHANOL-D3
Creation_time = 19-NOV-2007 20:04:15
Revision_time = 7-JUL-2008 16:01:18
Current_time  = 7-JUL-2008 16:01:49

Comment      = single pulse decouple
Data_format  = 1D COMPLEX
Dir_size     = 52428
Dir_title    = 13C
Dir_units    = [ppm]
Dimensions   = X
Site         = ECK 300
Spectrometer = DELTA2_NMR

Field_strength = 7.0566013 [T] (300 [MHz])
X_acq_duration = 2.76824054 [s]
X_domain       = 13C
X_freq         = 75.56823426 [MHz]
X_offset       = 130 [ppm]
X_points       = 65536
X_prescans     = 4
X_resolution   = 0.36124027 [Hz]
X_sweep        = 23.67424242 [kHz]
Irr_domain     = 1H
Irr_freq       = 300.52965592 [MHz]
Irr_offset     = 5 [ppm]
Clipped        = FALSE
Mod_return     = 13
Scans          = 125
Total_scans    = 125

X_s0_width    = 9.75 [us]
X_acq_time     = 2.76824054 [s]
X_angle        = 33 [deg]
X_atn          = 8 [dB]
X_pulse        = 3.25 [us]
Irr_atn_dec    = 25 [dB]
Irr_atn_noc    = 25 [dB]
Irr_noise      = WALTZ
Decoupling     = TRUE
Initial_wait   = 1 [s]
Noe            = TRUE
Noe_time       = 2 [s]
Recvr_gain     = 50
Relaxation_delay = 2 [s]
Repetition_time = 4.76824054 [s]
Temp_get       = 23.4 [dC]
  
```

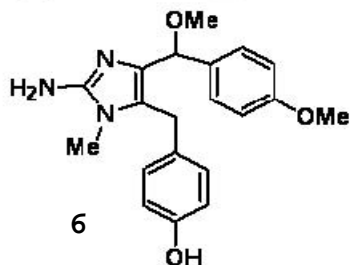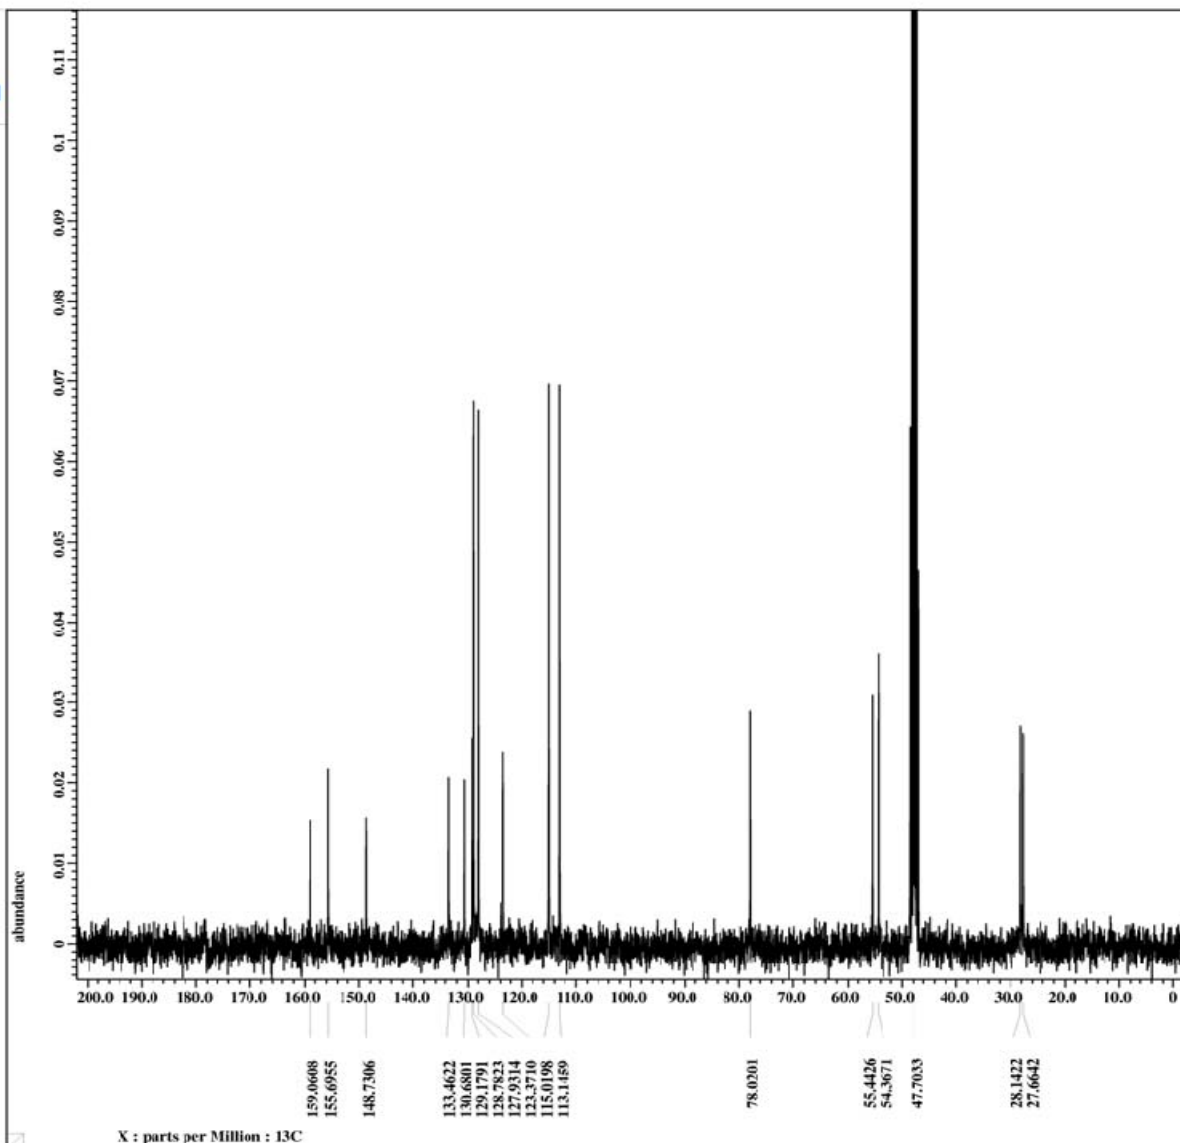

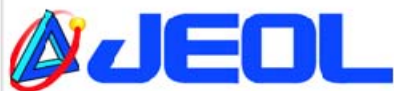

Filename = III\_p\_108\_iii-3.jdf  
Author = delta  
Experiment = single pulse.exp  
Sample\_id = S#695176  
Solvent = CHLOROFORM-D  
Creation\_time = 21-DEC-2007 00:32:21  
Revision\_time = 7-JUL-2008 16:05:06  
Current\_time = 7-JUL-2008 16:05:53  
Comment = Single Pulse Experime  
Data\_format = 1D COMPLEX  
Dim\_size = 16384  
Dim\_title = 1H  
Dim\_units = [ppm]  
Dimensions = X  
Site = Eclipse+ 500  
Spectrometer = DELTA\_NMR  
Field\_strength = 11.7473579[T] (500[MH  
X\_acq\_duration = 2.1823488[s]  
X\_domain = 1H  
X\_freq = 500.15991521[MHz]  
X\_offset = 5[ppm]  
X\_points = 16384  
X\_prescans = 0  
X\_resolution = 0.45822189[Hz]  
X\_sweep = 7.50750751[kHz]  
Clipped = FALSE  
Mod\_return = 1  
Scans = 12  
Total\_scans = 12  
X\_90\_width = 18.5[us]  
X\_acq\_time = 2.1823488[s]  
X\_angle = 45[deg]  
X\_pulse = 9.25[us]  
Initial\_wait = 1[s]  
Phase\_preset = 3[us]  
Recvr\_gain = 21  
Relaxation\_delay = 4[s]  
Temp\_get = 24.9[dc]  
Unblank\_time = 2[us]

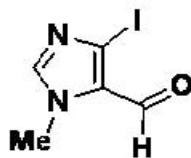

16

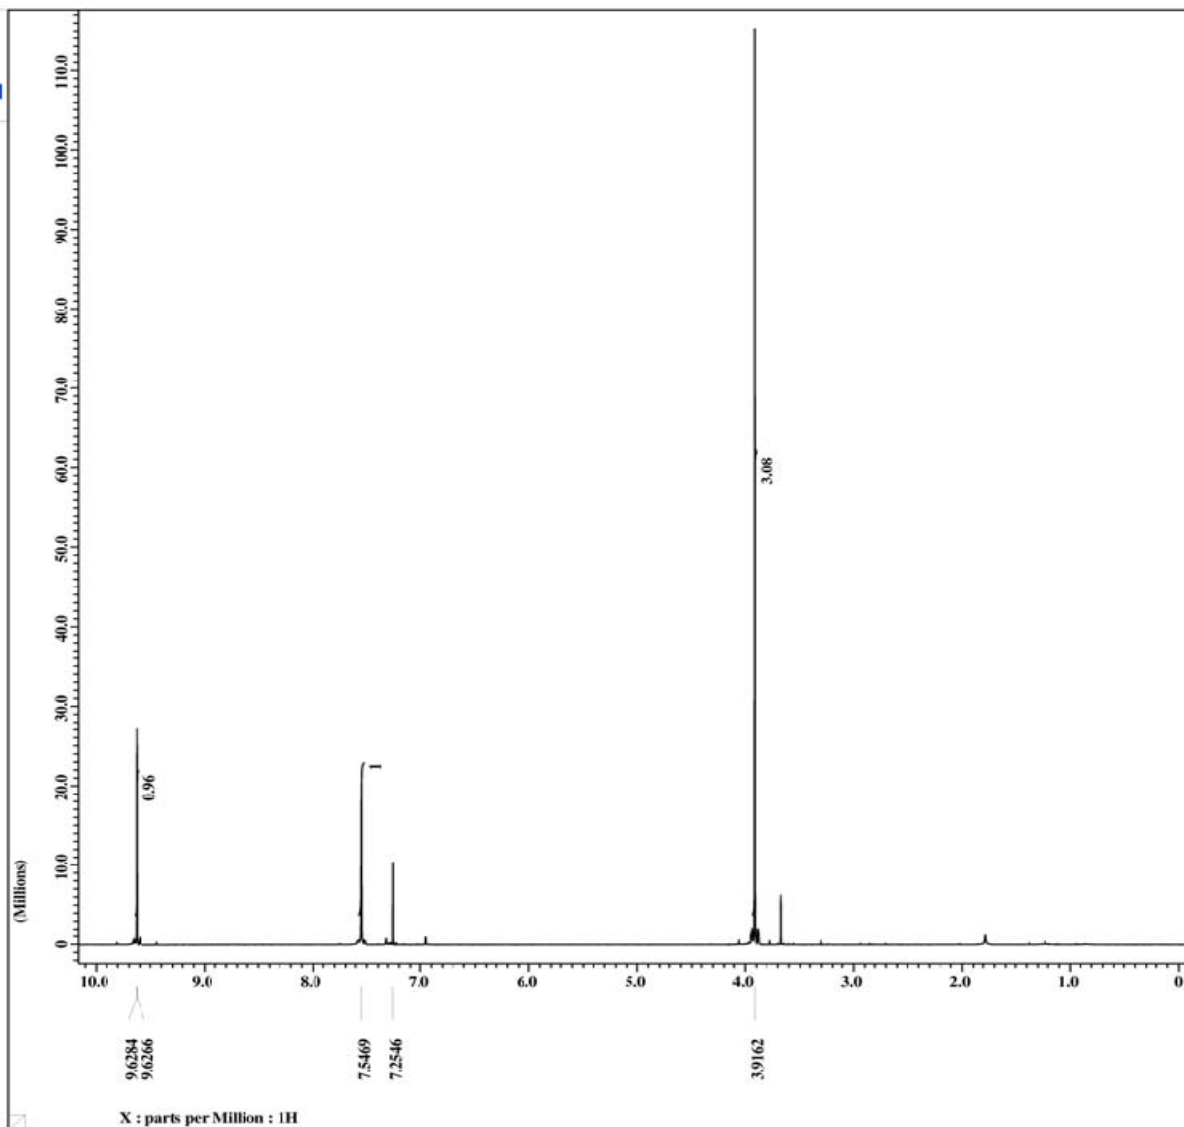

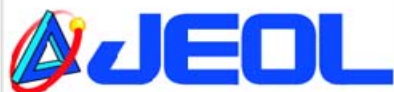

Filename = III\_p\_109\_iii-2.jdf  
Author = delta  
Experiment = single\_pulse\_dec  
Sample\_id = S8708688  
Solvent = CHLOROFORM-D  
Creator\_time = 21-DEC-2007 00:53:21  
Revision\_time = 7-JUL-2008 16:08:33  
Current\_time = 7-JUL-2008 16:09:01

Comment = single pulse decouple  
Data\_format = 1D COMPLEX  
Dim\_size = 52428  
Dim\_title = 13C  
Dim\_units = [ppm]  
Dimensions = X  
Site = ECY 300  
Spectrometer = DELTA2\_NMR

Field\_strength = 7.0586013[T] (300[MHz])  
X\_acq\_duration = 2.76824054[s]  
X\_domain = 13C  
X\_freq = 75.55823426[MHz]  
X\_offset = 100[ppm]  
X\_points = 5535  
X\_prescans = 4  
X\_resolution = 0.36124027[Hz]  
X\_sweep = 23.67424242[kHz]  
Irr\_domain = 1H  
Irr\_freq = 300.52965592[MHz]  
Irr\_offset = 5[ppm]  
Clipped = FALSE  
Mod\_Return = 10  
Scans = 3600  
Total\_scans = 3600

X\_90\_width = 9.75[us]  
X\_acq\_time = 2.76824054[s]  
X\_angle = 30[deg]  
X\_atn = 8[dB]  
X\_pulse = 3.25[us]  
Irr\_atn\_dec = 25[dB]  
Irr\_atn\_noe = 25[dB]  
Irr\_noise = WALTE  
Decoupling = TRUE  
Initial\_wait = 1[s]  
Noe = TRUE  
Noe\_time = 2[s]  
Recvr\_gain = 50  
Relaxation\_delay = 2[s]  
Repetition\_time = 4.76824054[s]  
Temp\_get = 23.5[dC]

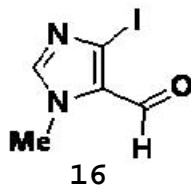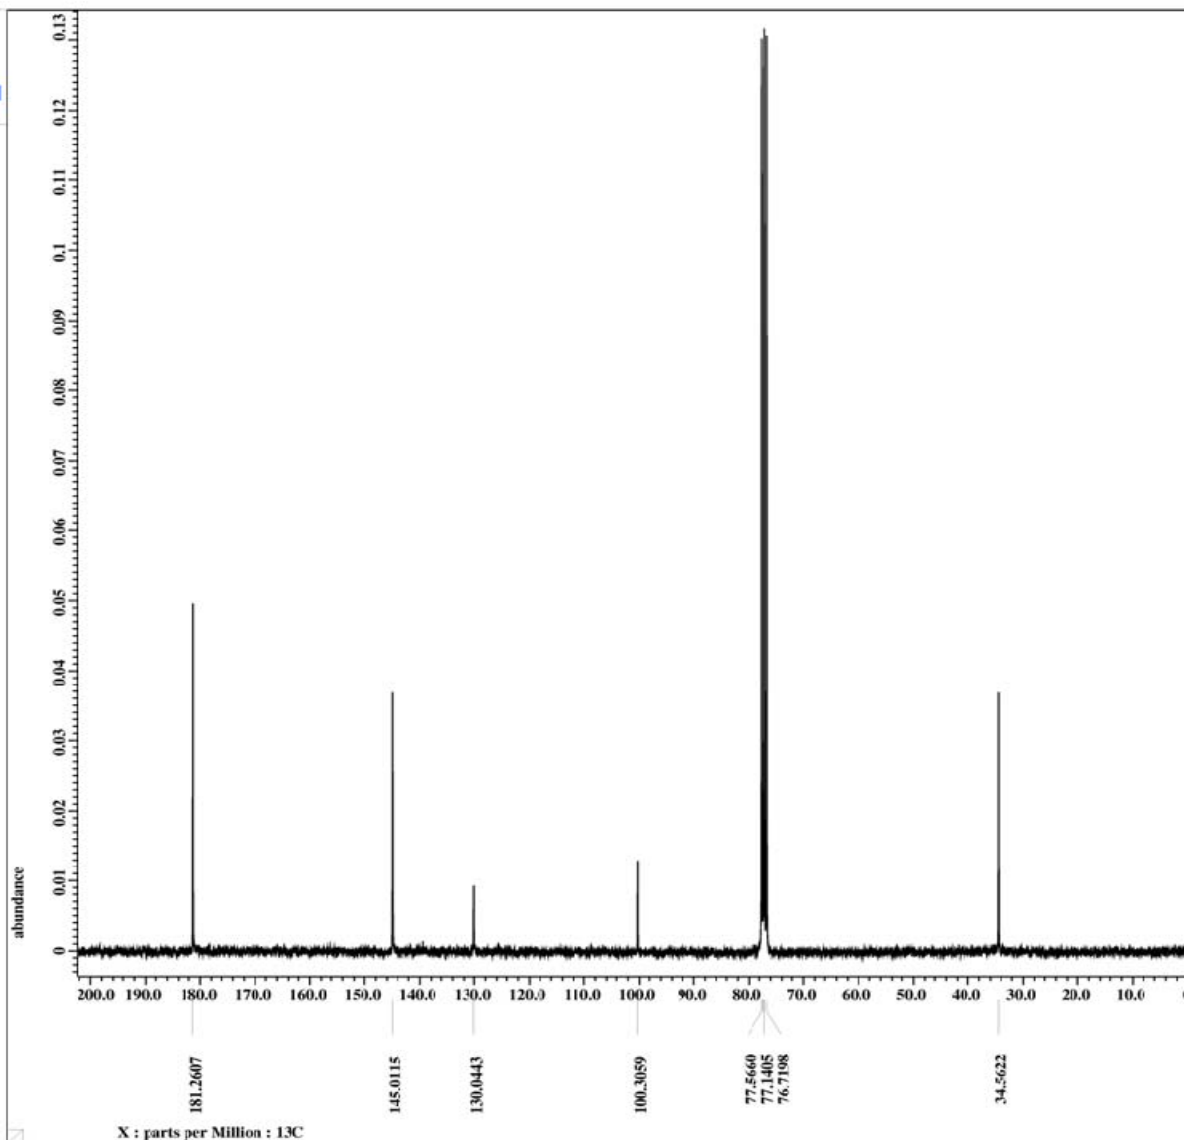

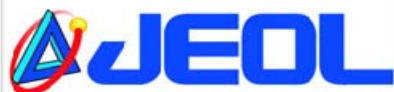

Filename = III\_p\_109\_ii-3.jdf  
Author = delta  
Experiment = single\_pulse.ex2  
Sample\_id = S#344783  
Solvent = CHLOROFORM-D  
Creation\_time = 28-DEC-2007 10:02:35  
Revision\_time = 9-JUL-2008 14:34:06  
Current\_time = 9-JUL-2008 14:34:35

Comment = single\_pulse  
Data\_format = 1D COMPLEX  
Dim\_size = 13107  
Dim\_title = 1H  
Dim\_units = [ppm]  
Dimensions = X  
Site = ECX 300  
Spectrometer = DELTA2\_NMR

Field\_strength = 7.0586013[T] (300[MHz]  
X\_acq\_duration = 3.63311584[s]  
X\_domain = 1H  
X\_freq = 300.52965592[MHz]  
X\_offset = 5[ppm]  
X\_points = 15384  
X\_prescans = 0  
X\_resolution = 0.27523068[Hz]  
X\_sweep = 4.50937951[kHz]  
f1r\_domain = 1H  
f1r\_freq = 300.52965592[MHz]  
f1r\_offset = 5[ppm]  
f1r\_domain = 1H  
f1r\_freq = 300.52965592[MHz]  
f1r\_offset = 5[ppm]  
Clipped = FALSE  
Mod\_return = 1  
Scans = 12  
Total\_scans = 12

X\_90\_width = 13.01[us]  
X\_acq\_time = 3.63311584[s]  
X\_angle = 45[deg]  
X\_atn = 4[db]  
X\_pulse = 6.505[us]  
f1r\_mode = Off  
f1r\_mode = Off  
Data\_presat = FALSE  
Initial\_wait = 1[s]  
Recvr\_gain = 46  
Relaxation\_delay = 5[s]  
Repetition\_time = 3.63311584[s]  
Temp\_get = 23.1[dC]

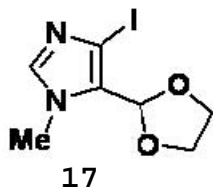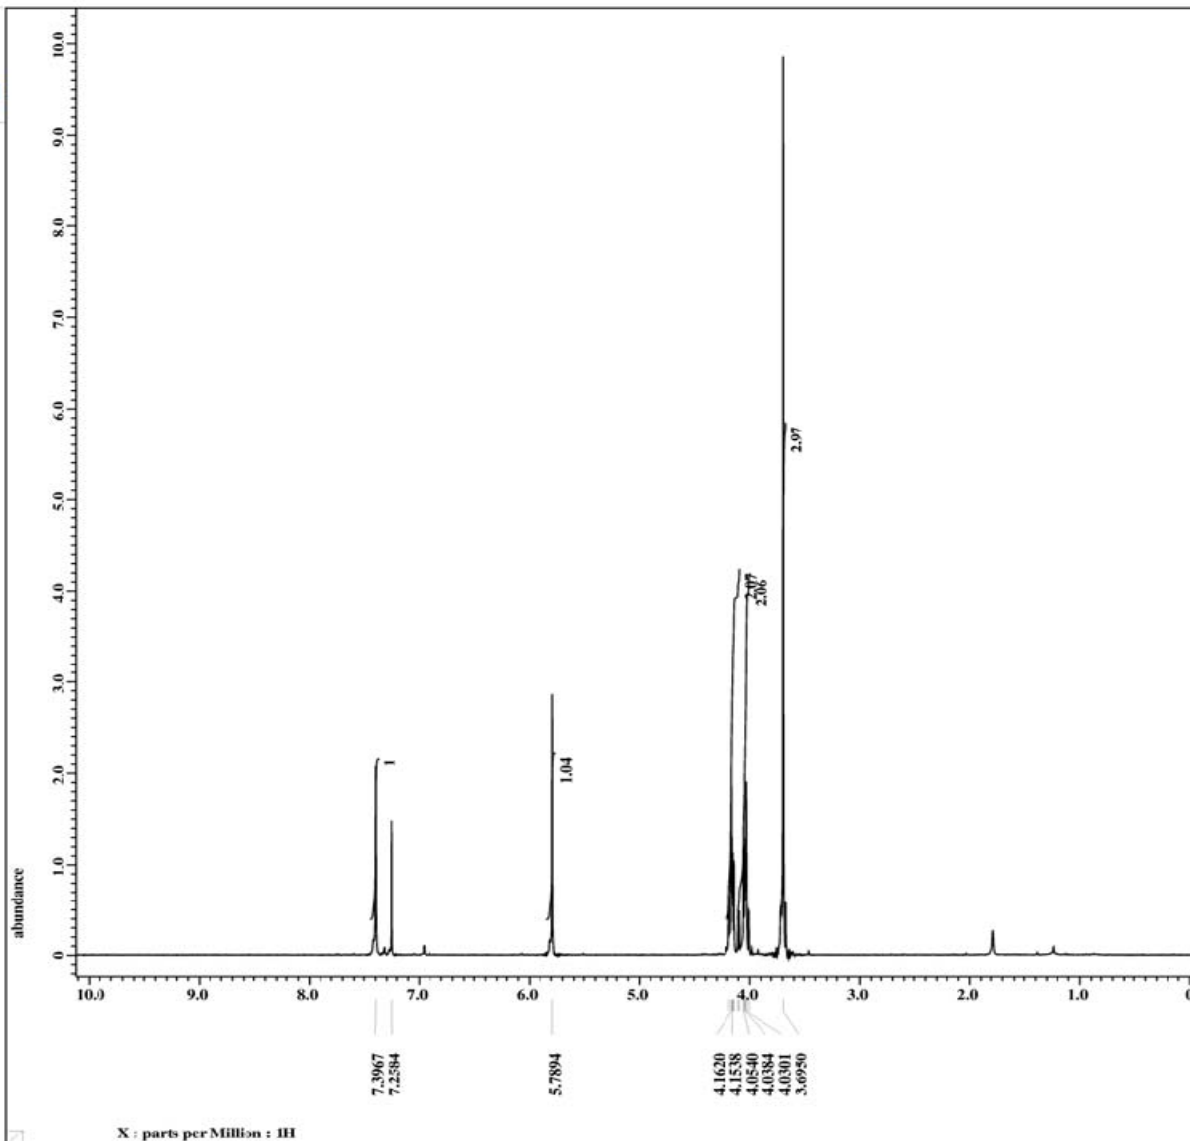

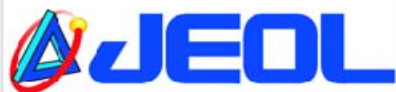

Filename = III\_p\_109\_ii-2.jdf  
Author = delta  
Experiment = single\_pulse\_dec  
Sample\_id = S#714454  
Solvent = CHLOROFORM-D  
Creation\_time = 29-DEC-2007 04:45:17  
Revision\_time = 29-DEC-2007 09:17:21  
Current\_time = 7-JUL-2008 16:18:31

Comment = single pulse decouple  
Data\_format = 1D COMPLEX  
Dim\_size = 52428  
Dim\_title = 13C  
Dim\_units = [ppm]  
Dimensions = X  
Site = ECX 300  
Spectrometer = DELTA2\_NMR

Field\_strength = 7.0586013[T] (300[MHz])  
X\_acq\_duration = 2.75824064[s]  
X\_domain = 13C  
X\_freq = 75.56823426[MHz]  
X\_offset = 100[ppm]  
X\_points = 65536  
X\_prescans = 4  
X\_resolution = 0.35124027[Hz]  
X\_sweep = 23.57424242[kHz]  
Irr\_domain = 1H  
Irr\_freq = 300.52965592[MHz]  
Irr\_offset = 5[ppm]  
Clipped = FALSE  
Mod\_return = 10  
Scans = 6400  
Total\_scans = 6400

X\_90\_width = 9.75[us]  
X\_acq\_time = 2.75824064[s]  
X\_angle = 30[deg]  
X\_atn = 8[db]  
X\_pulse = 3.25[us]  
Irr\_atn\_dec = 25[db]  
Irr\_atn\_noe = 25[db]  
Irr\_noise = WALTZ  
Decoupling = TRUE  
Initial\_wait = 1[s]  
Noe = TRUE  
Noe\_time = 2[s]  
Recvr\_gain = 50  
Relaxation\_delay = 2[s]  
Repetition\_time = 4.75824064[s]  
Temp\_get = 22.5[dc]

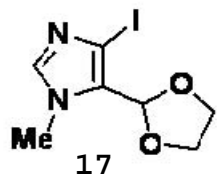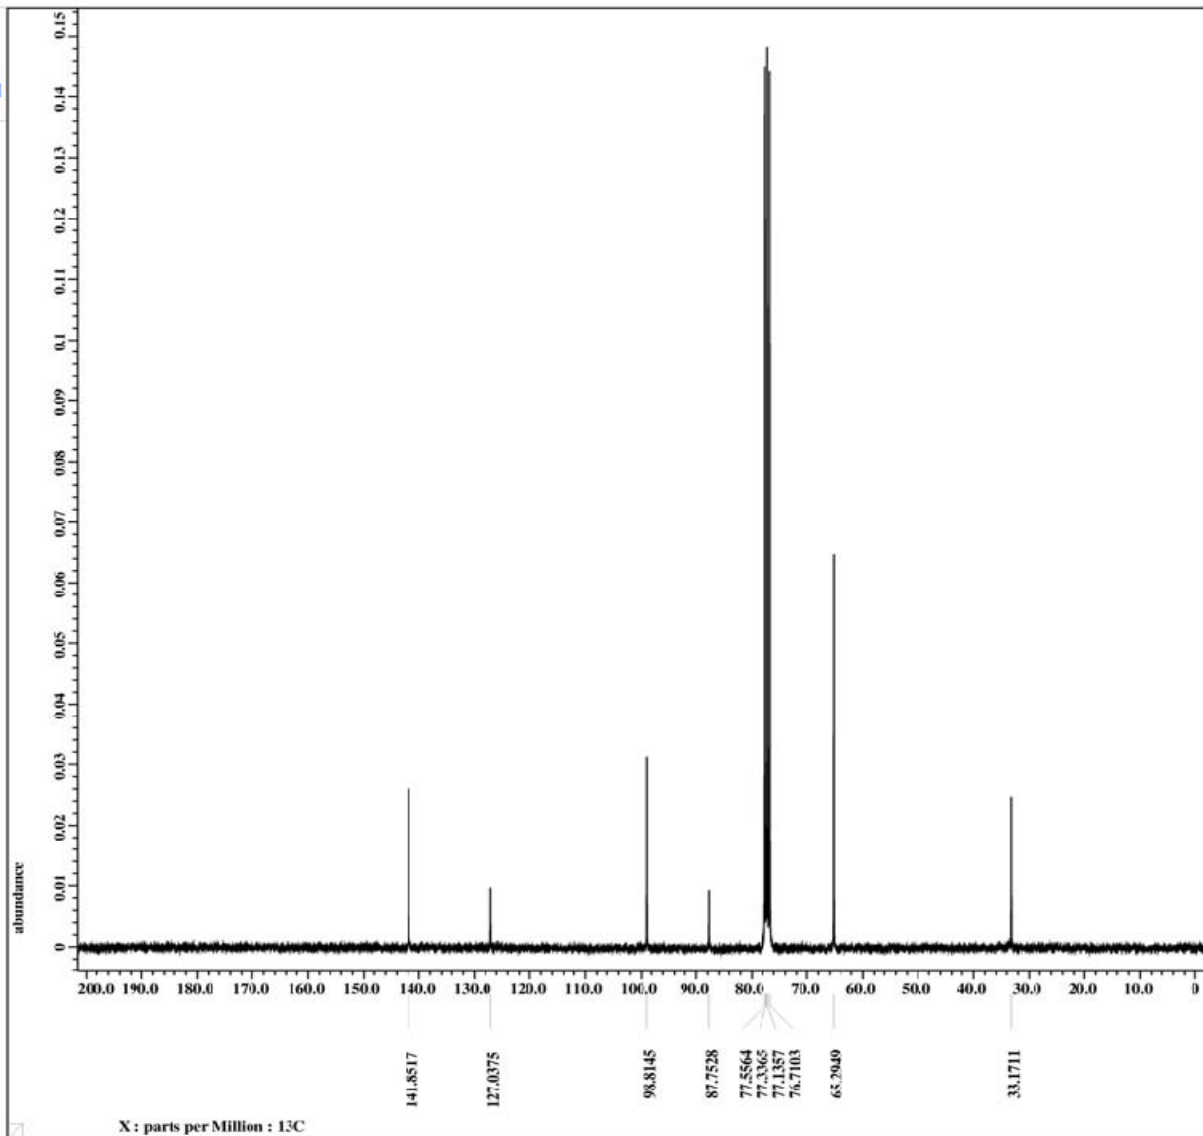

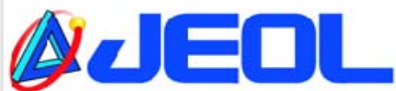

Filename = IV\_p\_001-4.jdf  
Author = delta  
Experiment = single pulse.exp  
Sample\_id = S#623247  
Solvent = CHLOROFORM-D  
Creation\_time = 30-APR-2008 23:29:23  
Revision\_time = 7-JUL-2008 16:24:23  
Current\_time = 7-JUL-2008 16:25:06  
  
Comment = Single Pulse Experi  
Data\_format = 1D COMPLEX  
Dim\_size = 16384  
Dim\_title = 18  
Dim\_units = [ppm]  
Dimensions = X  
Site = Eclipse+ 500  
Spectrometer = DELTA\_NMR  
  
Field\_strength = 11.7473579[T] (500[MH  
K\_acq\_duration = 2.1823489[s]  
K\_domain = 18  
K\_freq = 500.15991521[MHz]  
K\_offset = 5[ppm]  
K\_points = 16384  
K\_prescans = 0  
K\_resolution = 0.45922199[Hz]  
K\_sweep = 7.50750751[kHz]  
Clipped = FALSE  
Mod\_return = 1  
Scans = 12  
Total\_scans = 12  
  
X\_90\_width = 18.5[us]  
K\_acq\_time = 2.1823489[s]  
K\_angle = 45[deg]  
K\_pulse = 9.25[us]  
Initial\_wait = 1[s]  
Phase\_preset = 3[us]  
Recvr\_gain = 23  
Relaxation\_delay = 4[s]  
Temp\_get = 25.3[dc]  
Unblank\_time = 2[us]

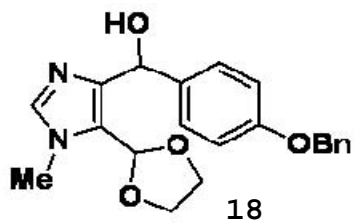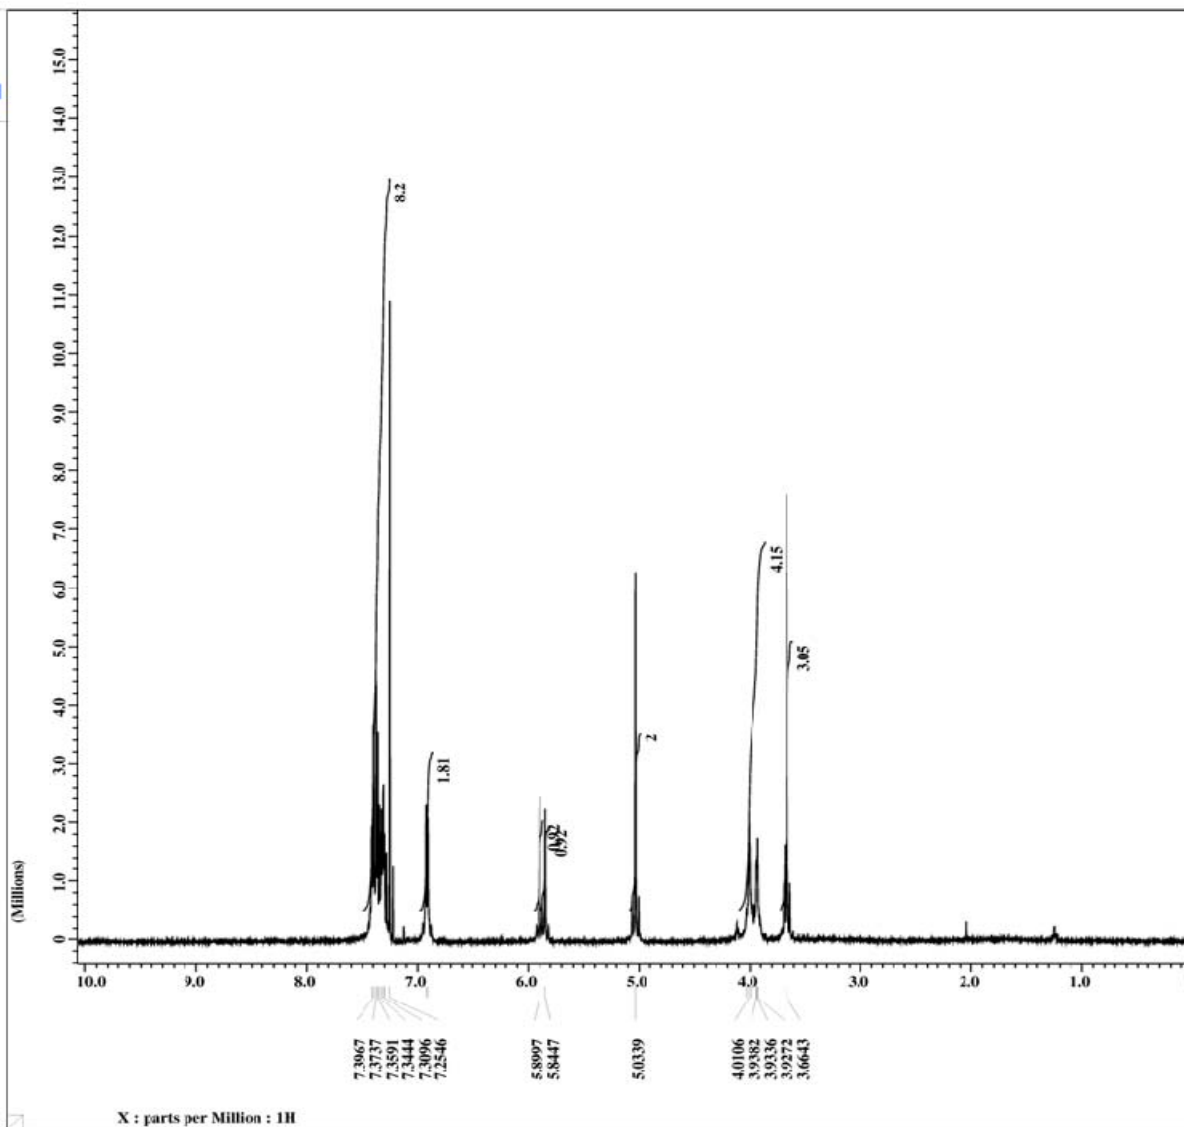

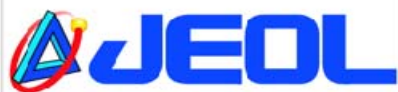

Filename = IV\_p\_017\_Acetal-pure-  
Author = delta  
Experiment = single pulse dec  
Sample\_id = S4791229  
Solvent = CHLOROFORM-D  
Creation\_time = 16-JUN-2008 06:23:20  
Revision\_time = 7-JUL-2008 16:30:09  
Current\_time = 7-JUL-2008 16:31:49

Comment = single pulse decouple  
Data\_format = 1D COMPLEX  
Dim\_size = 65536  
Dim\_title = 13C  
Dim\_units = [ppm]  
Dimensions = X  
Site = Eclipse+ 500  
Spectrometer = DELTA\_MMR

Field\_strength = 11.7473579[T] (500[MH  
X\_acq\_duration = 2.0840448[s]  
X\_domain = 13C  
X\_freq = 125.76529763[MHz]  
X\_offset = 100[ppm]  
X\_points = 65536  
X\_prescans = 4  
X\_resolution = 0.47983613[Hz]  
X\_sweep = 31.44654088[kHz]  
Irr\_domain = 13C  
Irr\_freq = 500.15991521[MHz]  
Irr\_offset = 5[ppm]  
Clipped = FALSE  
Mod\_return = 1  
Scans = 1275  
Total\_scans = 1275

X\_90\_width = 14.2[us]  
X\_acq\_time = 2.0840448[s]  
X\_angle = 30[deg]  
X\_pulse = 4.73333333[us]  
Irtial\_wait = 1[s]  
Nce\_time = 1[s]  
Phase\_preset = 3[us]  
Recv\_gain = 30  
Relaxation\_delay = 2[s]  
Temp\_get = 26.7[dc]  
Urblank\_time = 2[us]

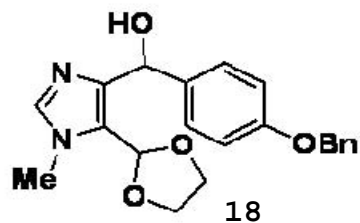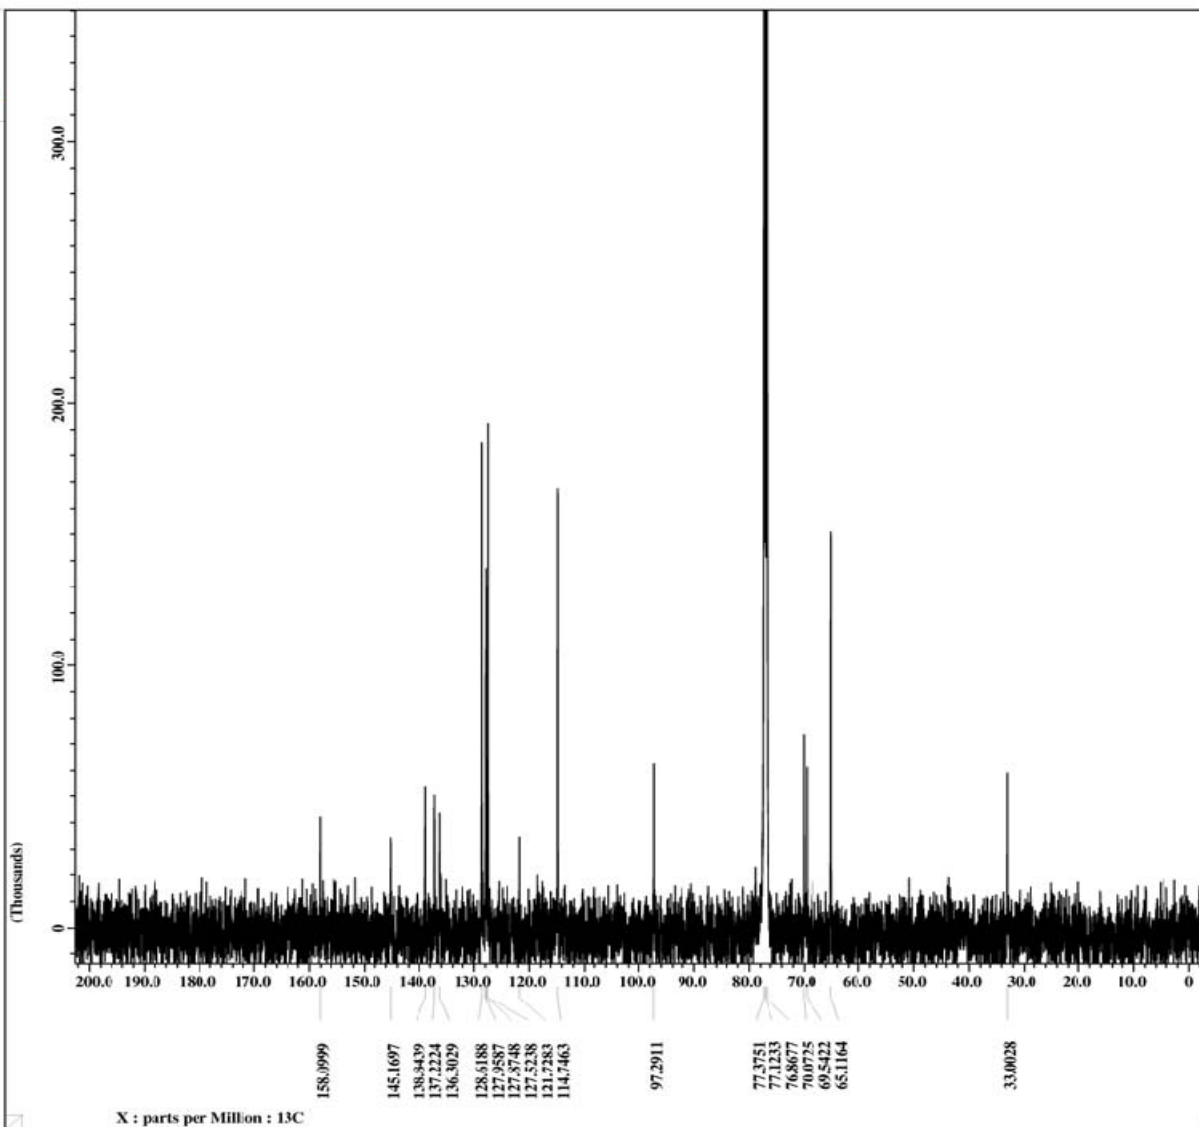

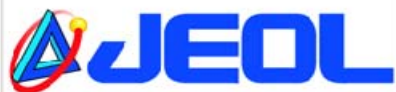

Filename = IV\_p\_102\_Aldehyde-2.j  
Author = delta  
Experiment = single\_pulse.exp  
Sample\_id = S#616256  
Solvent = CHLOROFORM-D  
Creation\_time = 28-JUN-2008 23:51:10  
Revision\_time = 7-JUL-2008 14:38:40  
Current\_time = 7-JUL-2008 16:39:09  
  
Comment = Single Pulse Experime  
Data\_format = 1D COMPLEX  
Dim\_size = 16384  
Dim\_title = 1H  
Dim\_units = [ppm]  
Dimensions = X  
Site = Eclipse+ 500  
Spectrometer = DELTA\_NMR  
  
Field\_strength = 11.7473579[T] (500[MH  
X\_acq\_duration = 2.1823488[s]  
X\_domain = 1H  
X\_freq = 500.15991521[MHz]  
X\_offset = 5[ppm]  
X\_points = 16384  
X\_prescans = 0  
X\_resolution = 0.45822189[Hz]  
X\_sweep = 7.50750751[kHz]  
Clipped = FALSE  
Mod\_return = 1  
Scans = 12  
Total\_scans = 12  
  
X\_90\_width = 18.5[us]  
X\_acq\_time = 2.1823488[s]  
X\_angle = 45[deg]  
X\_pulse = 9.25[us]  
Initial\_wait = 1[s]  
Phase\_preset = 3[us]  
Recvr\_gain = 20  
Relaxation\_delay = 4[s]  
Temp\_get = 25.3[dC]  
Unblank\_time = 2[us]

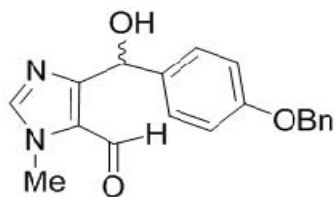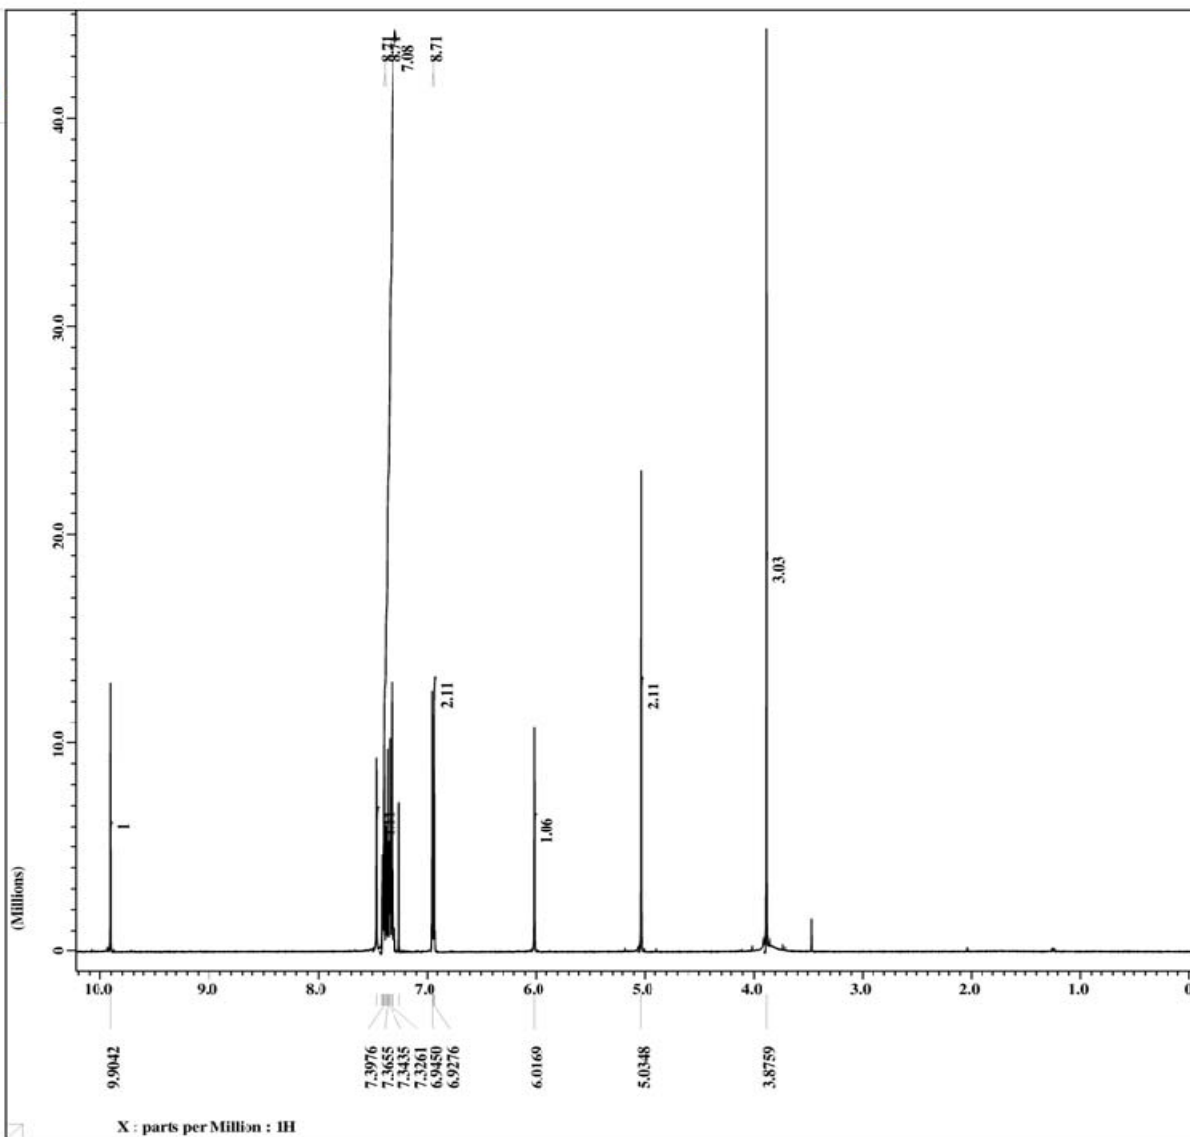





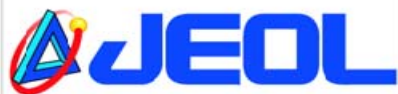

```

Filename      = IV_p_024_CHO-3.jdf
Author       = delta
Experiment   = single_pulse.exp
Sample_id    = S#702782
Solvent      = CHLOROFORM-D
Creation_time = 15-MAY-2008 01:49:35
Revision_time = 7-JUL-2008 16:48:45
Current_time  = 7-JUL-2008 16:49:25

Comment      = Single Pulse Experime
Data_format  = 1D COMPLEX
Dim_size     = 16384
Dim_title    = 1H
Dim_units    = [ppm]
Dimensions   = X
Site         = Eclipse+ 500
Spectrometer = DELTA_NMR

Field_strength = 11.7473579[T] (500[MH
X_acq_duration = 2.1823488[s]
X_domain       = 1H
X_freq         = 500.15991521[MHz]
X_offset       = 5[ppm]
X_points       = 15384
X_prescans     = 0
X_resolution   = 0.45822189[Hz]
X_sweep        = 7.50750751[kHz]
Clipped        = FALSE
Mod_return     = 1
Scans          = 12
Total_scans    = 12

X_90_width    = 19.5[us]
X_acq_time     = 2.1823488[s]
X_angle        = 45[deg]
X_pulse        = 9.25[us]
Initial_wait   = 1[s]
Phase_preset   = 3[us]
Recvr_gain     = 15
Relaxation_delay = 4[s]
Temp_get       = 25.2[c]
Unblank_time   = 2[us]
  
```

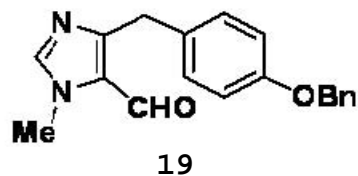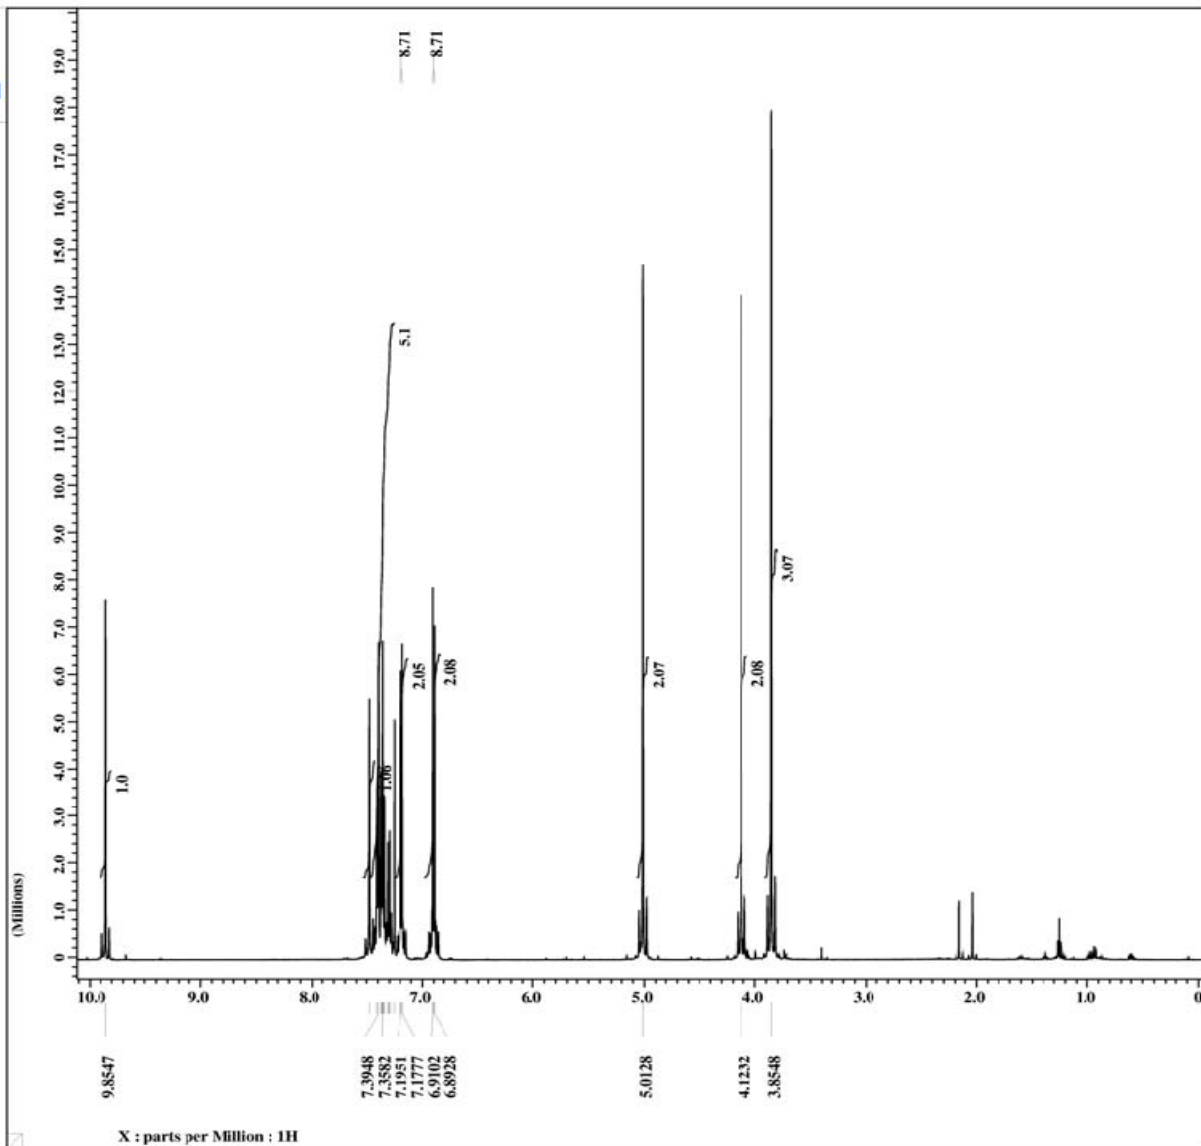

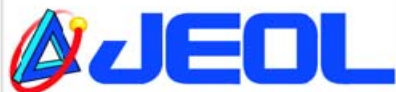

Filename = IV\_p\_024\_CHO-2.jdf  
Author = delta  
Experiment = single\_pulse\_dec  
Sample\_id = S#705544  
Solvent = CHLOROFORM-D  
Creation\_time = 15-MAY-2008 03:31:15  
Revision\_time = 14-MAY-2008 21:15:20  
Current\_time = 7-JUL-2008 15:53:36

Comment = single pulse decouple  
Data\_format = 1D\_COMPLEX  
Dim\_size = 65536  
Dim\_title = 13C  
Dim\_units = [ppm]  
Dimensions = X  
Site = Eclipse+ 500  
Spectrometer = DELTA\_NMR

Field\_strength = 11.7473579[T] (500[MH  
X\_acq\_duration = 2.0840448[s]  
X\_domain = 13C  
X\_freq = 125.76529768 [MHz]  
X\_offset = 100 [ppm]  
X\_points = 65536  
X\_prescans = 4  
X\_resolution = 0.47983613 [Hz]  
X\_sweep = 31.44654088 [kHz]  
Irr\_domain = 1H  
Irr\_freq = 500.15991521 [MHz]  
Irr\_offset = 5 [ppm]  
Clipped = FALSE  
Mod\_return = 1  
Scans = 1153  
Total\_scans = 1153

X\_90\_width = 14.2[us]  
X\_acq\_time = 2.0840448[s]  
X\_angle = 30 [deg]  
X\_pulse = 4.73333333[us]  
Initial\_wait = 1[s]  
Noe\_time = 1[s]  
Phase\_preset = 3[us]  
Recvr\_gain = 30  
Relaxation\_delay = 2[s]  
Temp\_get = 27.2[dC]  
Unblank\_time = 2[us]

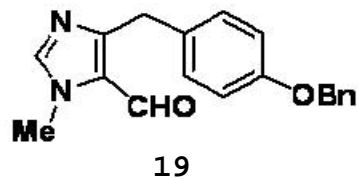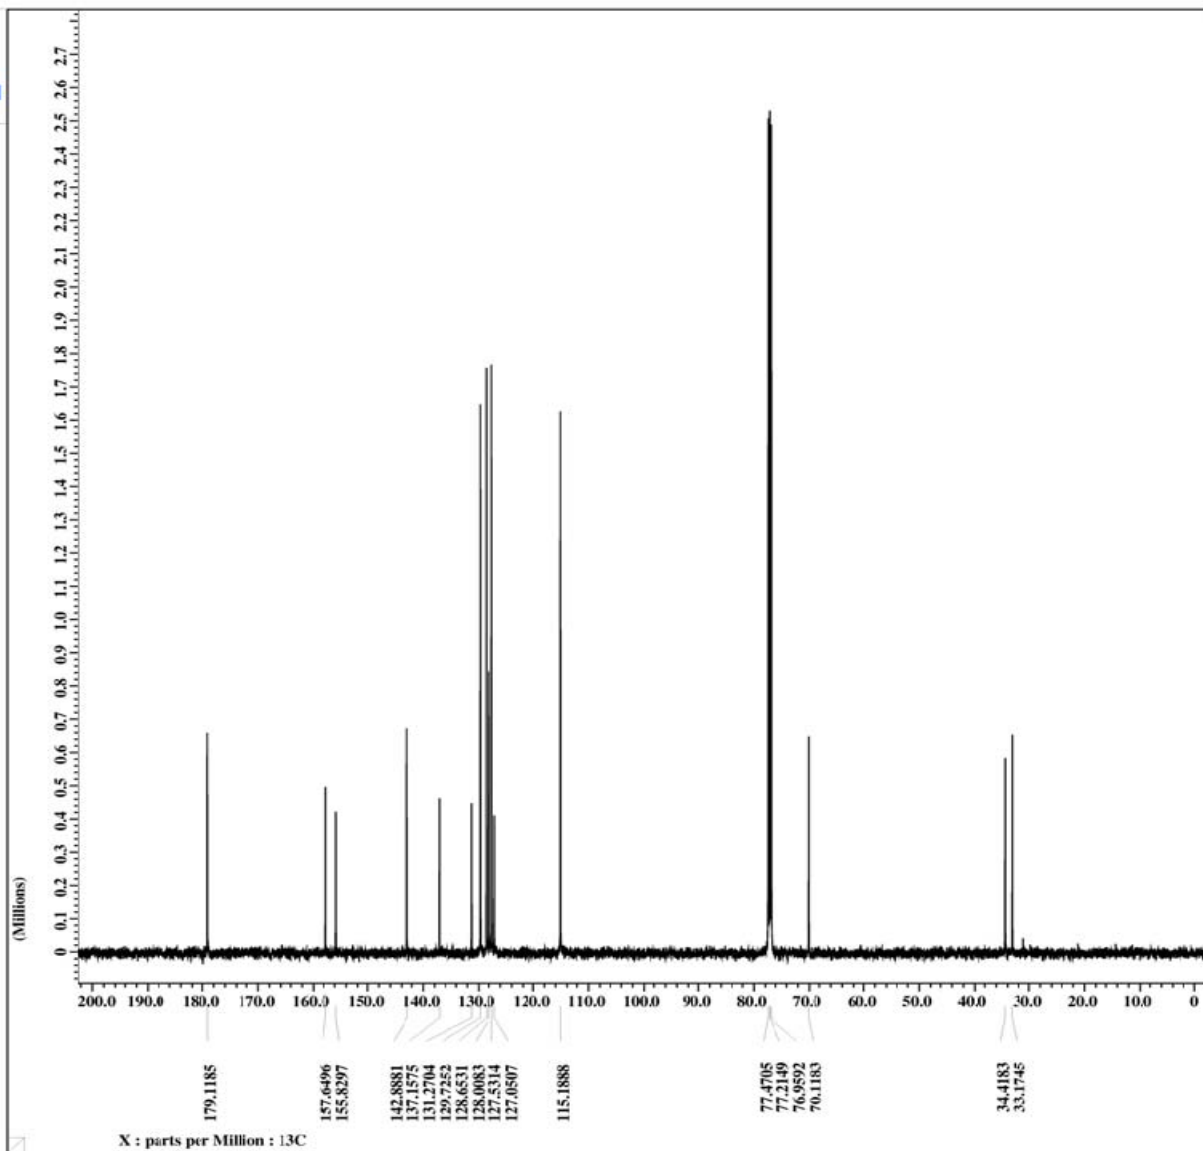

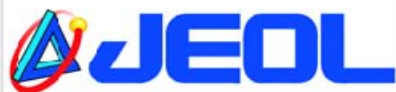

```

Filename      = IV_p_047_switched BnO
Author       = delta
Experiment   = single_pulse.ex2
Sample_id    = S#819931
Solvent      = CHLOROFORM-D
Creation_time = 29-MAY-2008 23:02:13
Revision_time = 7-JUL-2008 16:58:08
Current_time  = 7-JUL-2008 16:58:41

Comment      = single_pulse
Data_format  = 1D COMPLEX
Dim_size     = 13107
Dim_title    = 1H
Dim_units    = [ppm]
Dimensions   = X
Site         = ECX 300
Spectrometer = DELTA2_NMR

Field_strength = 7.0586013[T] (300[MHz]
X_acq_duration = 3.63331584[s]
X_domain       = 1H
X_freq         = 300.52965592[MHz]
X_offset       = 5[ppm]
X_points       = 16384
X_prescans     = 0
X_resolution   = 0.27523068[Hz]
X_sweep        = 4.50937951[kHz]
Irr_domain     = 1H
Irr_freq       = 300.52965592[MHz]
Irr_offset     = 5[ppm]
Tri_domain     = 1H
Tri_freq       = 300.52965592[MHz]
Tri_offset     = 5[ppm]
Clipped        = FALSE
Mod_return     = 1
Scans          = 12
Total_scans    = 12

X_90_width    = 13.01[us]
X_acq_time     = 3.63331584[s]
X_angle        = 45[deg]
X_atn          = 4[db]
X_pulse        = 6.505[us]
Irr_mode       = Off
Tri_mode       = Off
Fante_presat  = FALSE
Initial_wait   = 1[s]
Recvr_gain     = 50
Relaxation_delay = 5[s]
Repetition_time = 8.63331584[s]
Temp_get       = 22.6[dc]
  
```

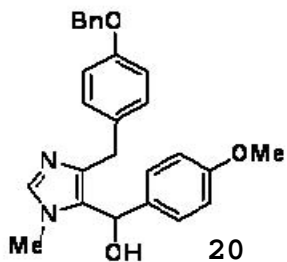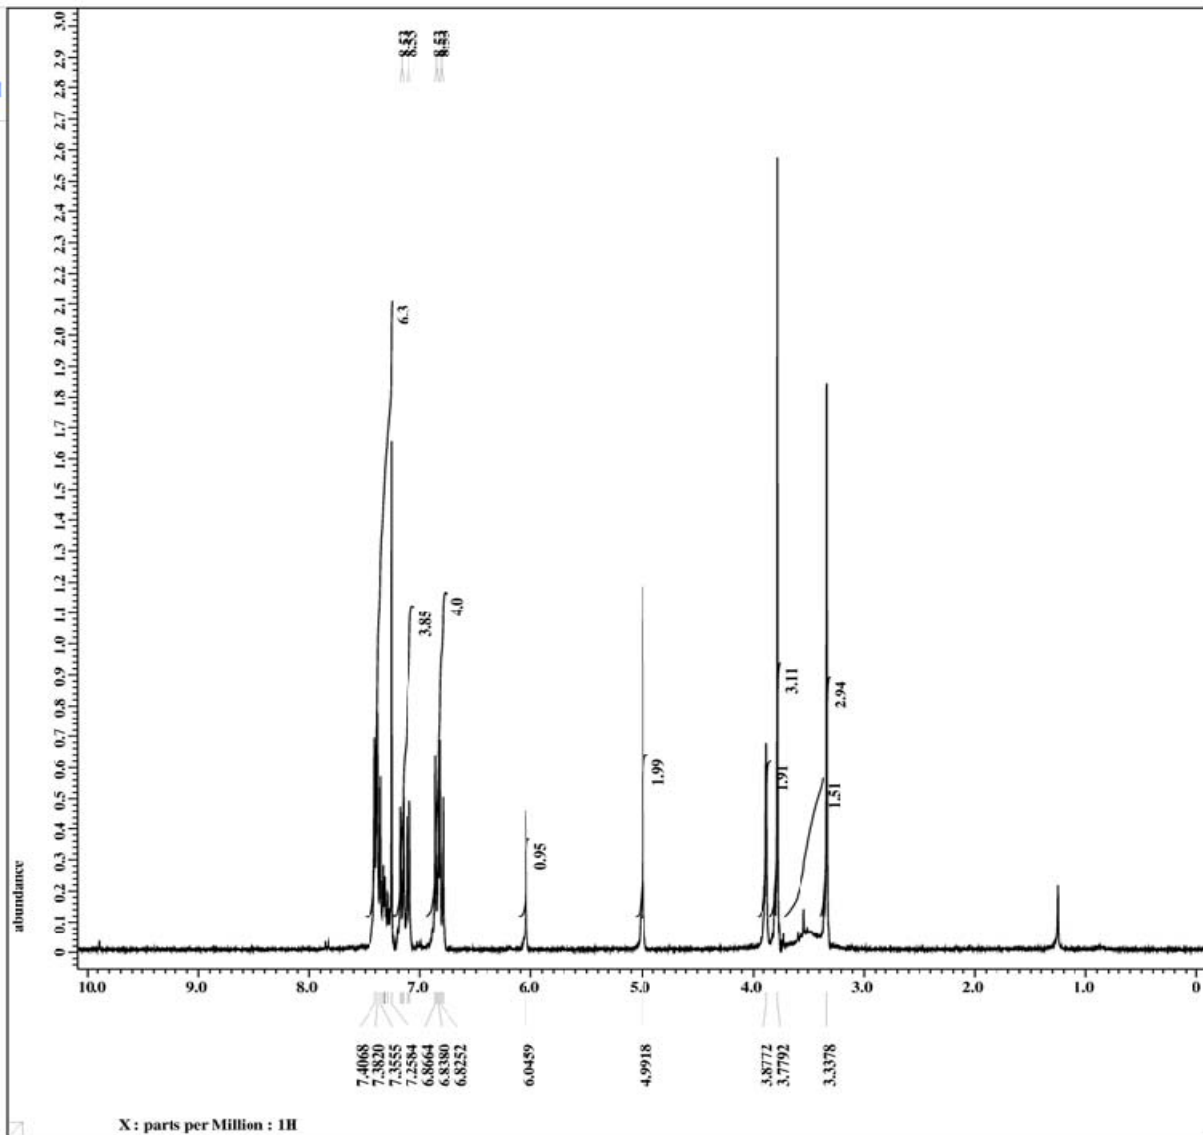

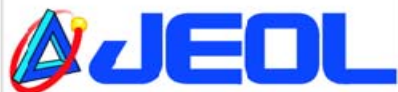

Filename = IV\_p\_047\_swthced BnC  
Author = delta  
Experiment = single\_pulse\_dec  
Sample\_id = S#821236  
Solvent = CHLOROFORM-D  
Creation\_time = 30-MAY-2008 07:32:33  
Revision\_time = 30-MAY-2008 09:46:59  
Current\_time = 7-JUL-2008 17:01:35

Comment = single pulse decouple  
Data\_format = 1D COMPLEX  
Dim\_size = 52428  
Dim\_title = 13C  
Dim\_units = [ppm]  
Dimensions = X  
Site = ECX 300  
Spectrometer = DELTA2\_NMR

Field\_strength = 7.0586013[T] (300[MHz])  
X\_acq\_duration = 2.76824064[s]  
X\_domain = 13C  
X\_freq = 75.56823426[MHz]  
X\_offset = 100[ppm]  
X\_points = 65536  
X\_prescans = 4  
X\_resolution = 0.36124027[Hz]  
X\_sweep = 25.67424242[kHz]  
Irr\_domain = 1H  
Irr\_freq = 300.52965592[MHz]  
Irr\_offset = 5[ppm]  
Clipped = FALSE  
Mod\_return = 10  
Scans = 6400  
Total\_scans = 6400

X\_90\_width = 9.75[us]  
X\_acq\_time = 2.76824064[s]  
X\_angle = 30[deg]  
X\_atn = 8[dB]  
X\_pulse = 3.25[us]  
Irr\_atn\_dec = 25[dB]  
Irr\_atn\_noe = 25[dB]  
Irr\_noise = WALTZ  
Decoupling = TRUE  
Initial\_wait = 1[s]  
Nce = TRUE  
Nce\_time = 2[s]  
Recvr\_gain = 50  
Relaxation\_delay = 2[s]  
Repetition\_time = 4.76824064[s]  
Temp\_get = 24.5[degC]

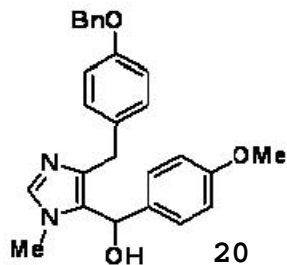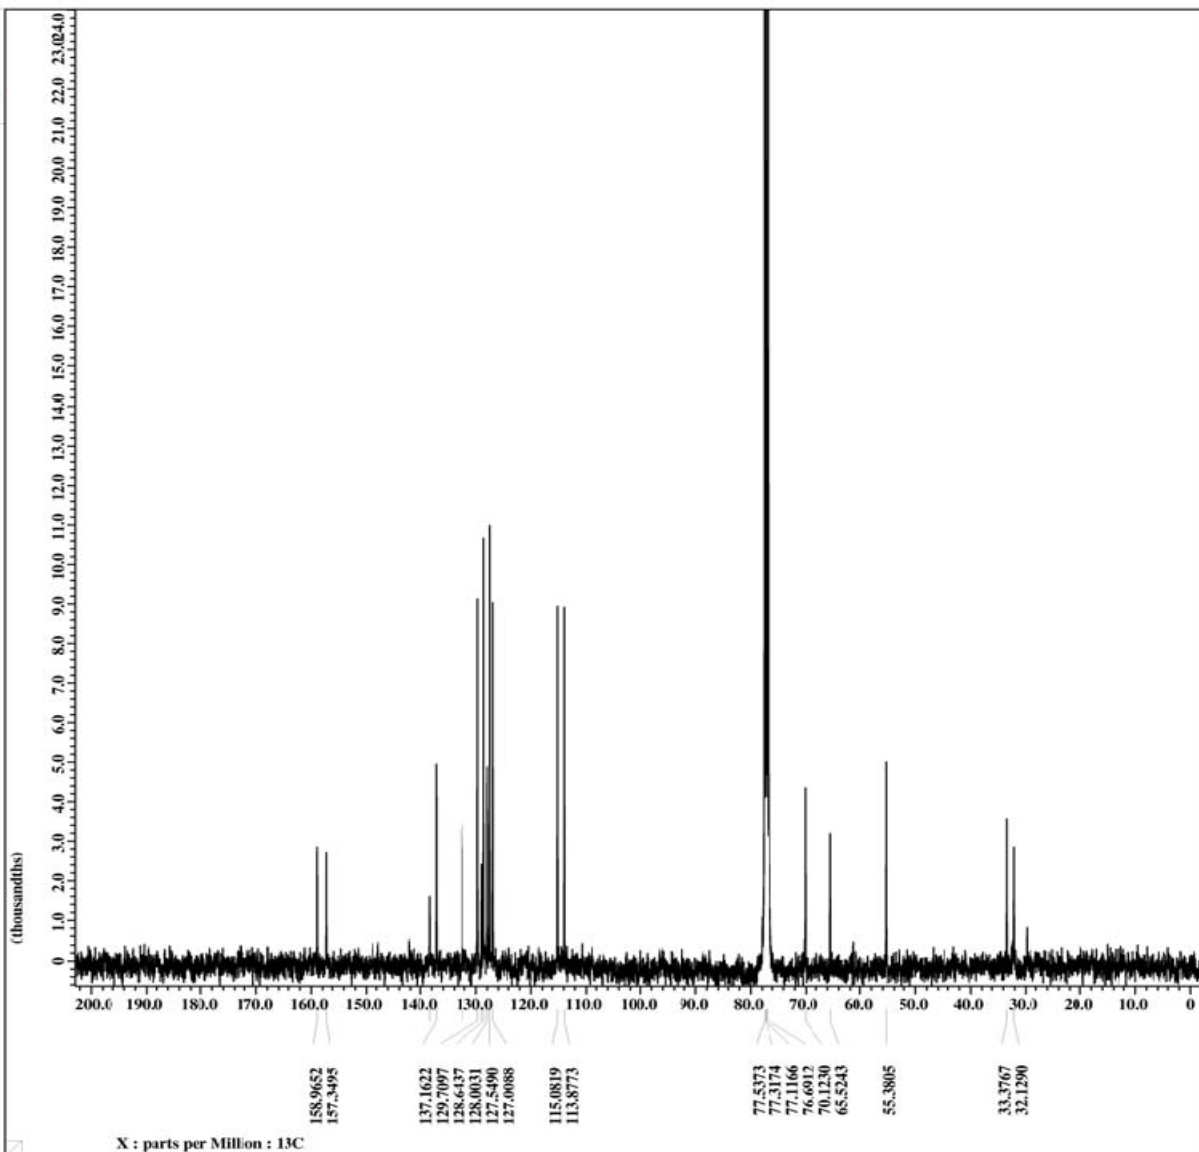

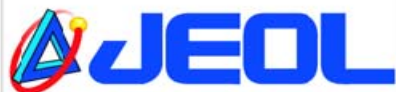

```

Filename      = IV_p_084_BnOMe-3.jdf
Author       = delta
Experiment   = single_pulse.exp
Sample_id    = S#828456
Solvent      = CHLOROFORM-D
Creation_time = 17-JUN-2008 05:40:06
Revision_time = 7-JUL-2008 17:06:08
Current_time  = 7-JUL-2008 17:06:44

Comment      = Single Pulse Experime
Data_format  = 1D COMPLEX
Dim_size     = 16384
Dim_title    = 1H
Dim_units    = [ppm]
Dimensions   = X
Site         = Eclipse+ 500
Spectrometer = DELTA_NMR

Field_strength = 11.7473579[T] (500[MH
X_acq_duration = 2.1823488[s]
X_domain      = 1H
X_freq        = 500.15991521[MHz]
X_offset      = 5[ppm]
X_points      = 16384
X_prescans    = 0
X_resolution  = 0.45822189[Hz]
X_sweep       = 7.50750751[kHz]
Clipped       = FALSE
Mod_return    = 1
Scans         = 12
Total_scans   = 12

X_90_width   = 18.5[us]
X_acq_time   = 2.1823488[s]
X_angle      = 45[deg]
X_pulse      = 9.25[us]
Initial_wait  = 1[s]
Phase_preset = 3[us]
Recvr_gain    = 12
Relaxation_delay = 4[s]
Temp_get     = 24.9[dC]
Unblank_time  = 2[us]
  
```

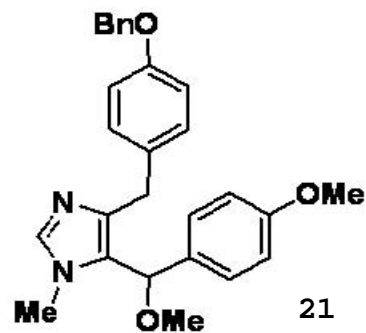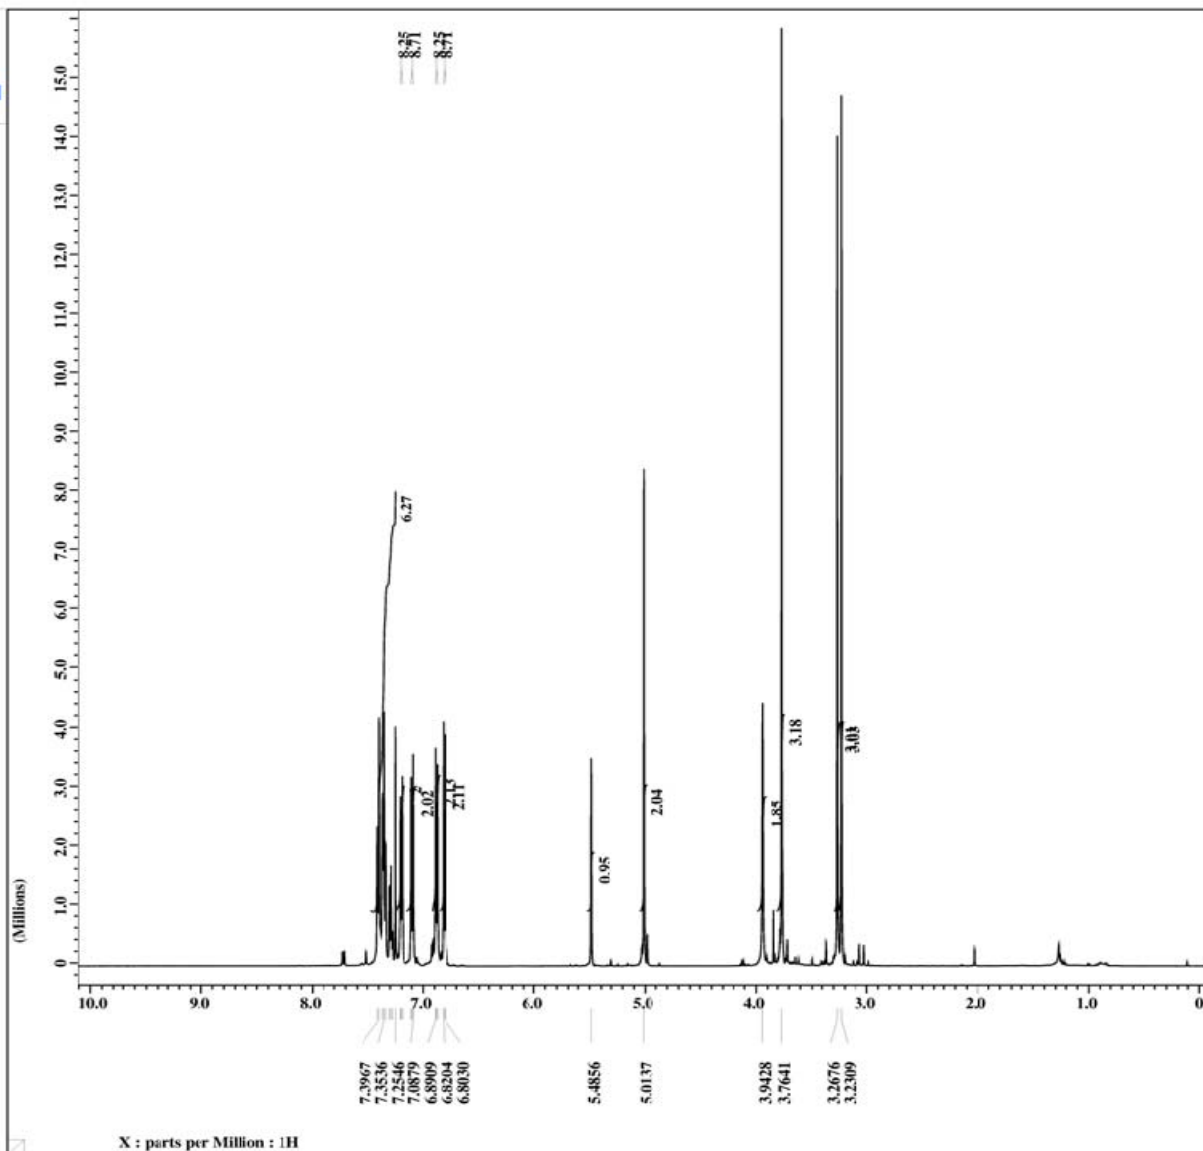

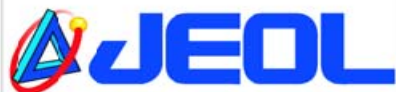

Filename = IV\_p\_084\_BnOMe-2.jdf  
Author = delta  
Experiment = single\_pulse\_dec  
Sample\_id = panduka  
Solvent = CHLOROFORM-D  
Creation\_time = 17-JUN-2008 10:32:47  
Revision\_time = 17-JUN-2008 11:38:31  
Current\_time = 7-JUL-2008 17:09:55

Comment = single pulse decouple  
Data\_format = 1D\_COMPLEX  
Dim\_size = 65536  
Dim\_title = 13C  
Dim\_units = [ppm]  
Dimensions = X  
Site = Eclipse+ 500  
Spectrometer = DELTA\_NMR

Field\_strength = 11.7473579[T] (500[MH  
X\_acq\_duration = 2.0840448[s]  
X\_domain = 13C  
X\_freq = 125.76529768[MHz]  
X\_offset = 100[ppm]  
X\_points = 65536  
X\_prescans = 4  
X\_resolution = 0.47983613[Hz]  
X\_sweep = 31.44654088[kHz]  
Irr\_domain = 1H  
Irr\_freq = 500.15991521[MHz]  
Irr\_offset = 5[ppm]  
Clipped = FALSE  
Mod\_return = 1  
Scans = 3000  
Total\_scans = 3000

X\_90\_width = 14.2[us]  
X\_acq\_time = 2.0840448[s]  
X\_angle = 30[deg]  
X\_pulse = 4.73333333[us]  
Initial\_wait = 1[s]  
Noe\_time = 1[s]  
Phase\_preset = 3[us]  
Recvr\_gain = 30  
Relaxation\_delay = 2[s]  
Temp\_get = 26.5[dC]  
Unblank\_time = 2[us]

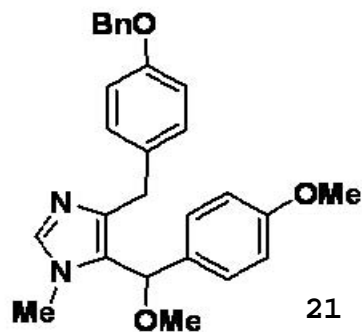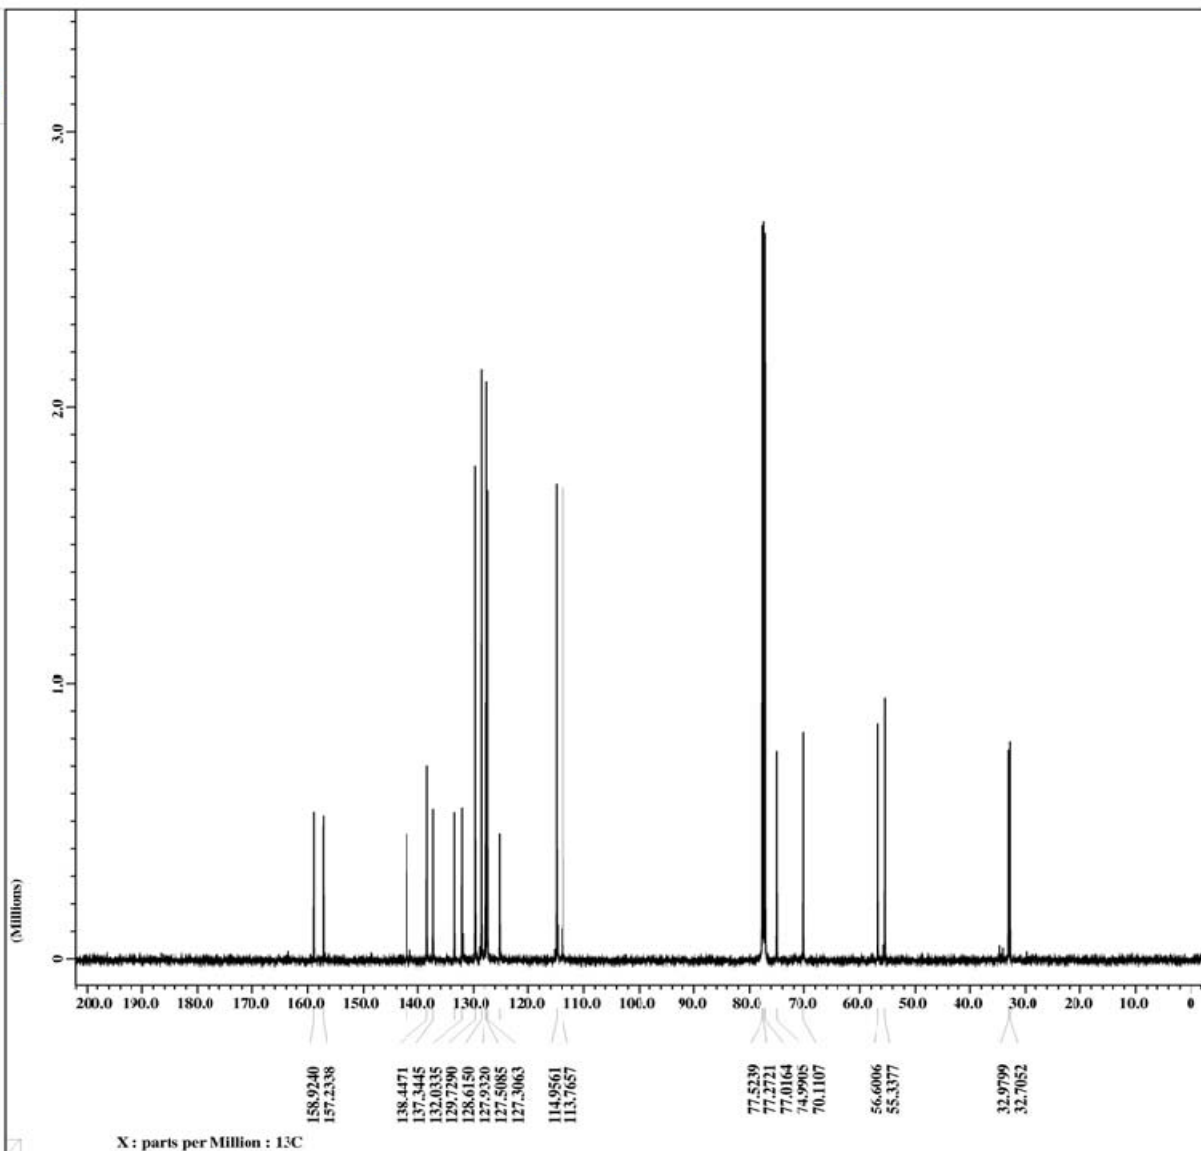

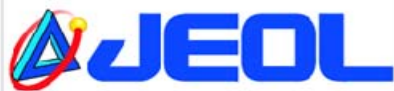

```

Filename      = IV_p_027_azide_pure-3
Author       = delta
Experiment   = single_pulse.exp
Sample_id    = S#743926
Solvent      = CHLOROFORM-D
Creation_time = 14-MAY-2008 02:58:03
Revision_time = 7-JUL-2008 17:14:45
Current_time  = 7-JUL-2008 17:15:11

Comment      = Single Pulse Experime
Data_format  = 1D COMPLEX
Dim_size     = 16384
Dim_title    = 1H
Dim_units    = [ppm]
Dimensions   = X
Site         = Eclipse+ 500
Spectrometer = DELTA_NMR

Field_strength = 11.7473579[T] (500[MH
X_acq_duration = 2.1823488[s]
X_domain       = 1H
X_freq         = 500.15991521[NHz]
X_offset       = 5[ppm]
X_points       = 16384
X_prescans     = 0
X_resolution   = 0.45822189[Hz]
X_sweep        = 7.50750751[kHz]
Clipped        = FALSE
Mod_return     = 1
Scans          = 12
Total_scans    = 12

X_90_width    = 18.5[us]
X_acq_time    = 2.1823488[s]
X_angle       = 45[deg]
X_pulse       = 9.25[us]
Initial_wait   = 1[s]
Phase_preset  = 3[us]
Recvr_gain    = 15
Relaxation_delay = 4[s]
Temp_get      = 25.1[dC]
Unblank_time  = 2[us]
  
```

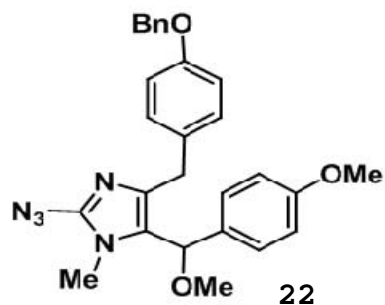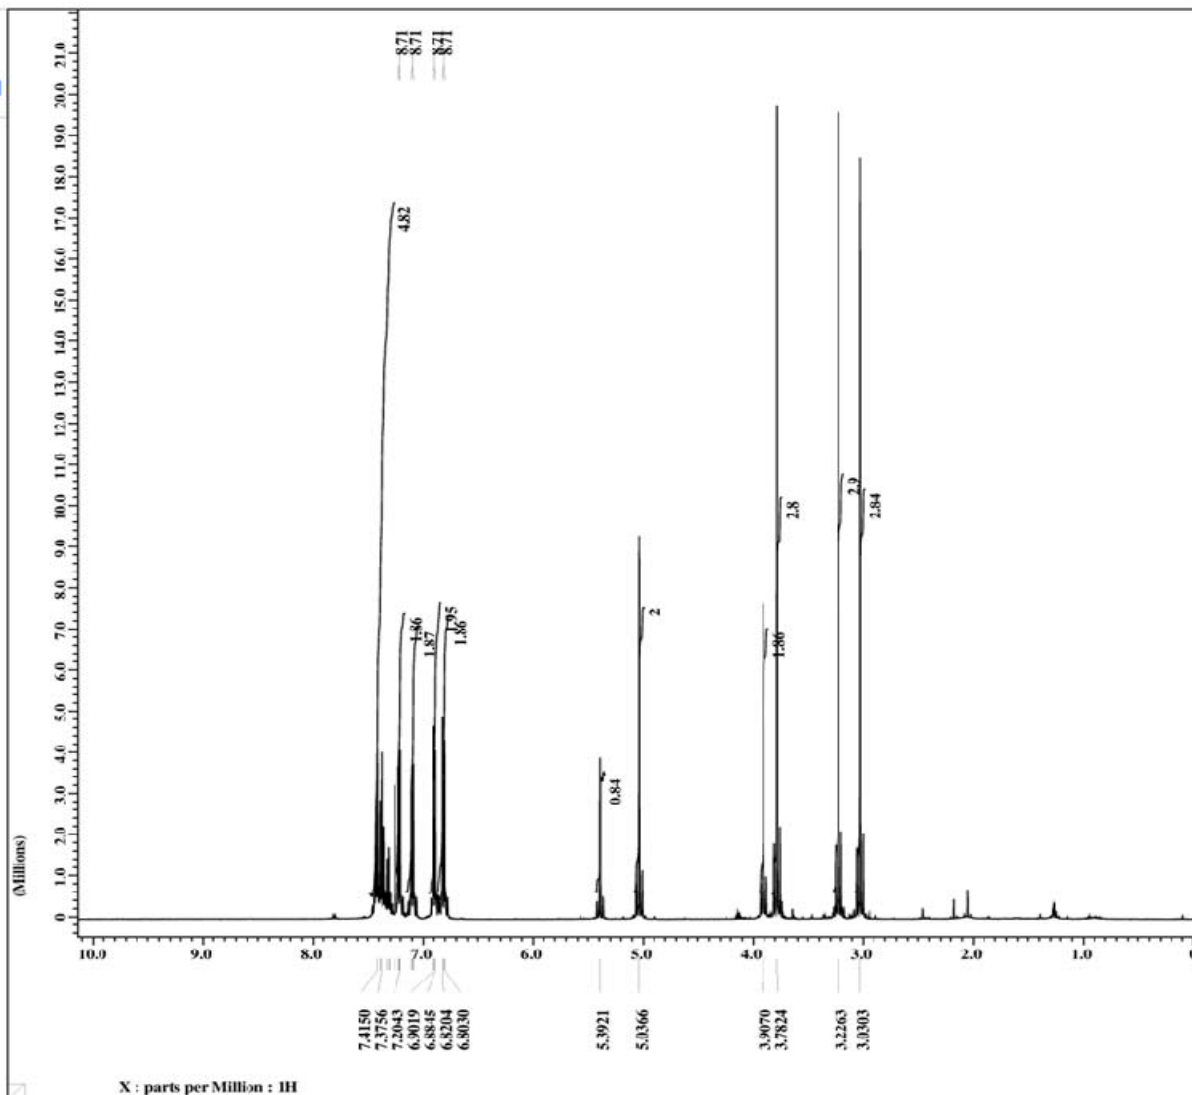





Filename = IV\_p\_027\_azide-2.jdf  
Author = delta  
Experiment = single\_pulse\_dec  
Sample\_id = S#773866  
Solvent = CHLOROFORM-D  
Creation\_time = 14-MAY-2008 08:54:16  
Revision\_time = 14-MAY-2008 10:00:30  
Current\_time = 7-JUL-2008 17:18:33

Comment = single pulse decouple  
Data\_format = 1D COMPLEX  
Dim\_size = 65536  
Dim\_title = 13C  
Dim\_units = [ppm]  
Dimensions = X  
Site = Ellipse: 500  
Spectrometer = DELTA\_NMR

Field\_strength = 11.7473579[T] (500[MH  
X\_acq\_duration = 2.0840448[s]  
X\_domain = 13C  
X\_freq = 125.76529768[MHz]  
X\_offset = 100[ppm]  
X\_points = 65536  
X\_prescans = 4  
X\_resolution = 0.47983613[Hz]  
X\_sweep = 31.44454088[kHz]  
F1r\_domain = 1H  
F1r\_freq = 500.18991521[MHz]  
F1r\_offset = 5[ppm]  
Clipped = FALSE  
Mod\_return = 1  
Scans = 3600  
Total\_scans = 3600

X\_90\_width = 14.2[us]  
X\_acq\_time = 2.0840448[s]  
X\_angle = 30[deg]  
X\_pulse = 4.73333333[us]  
Initial\_wait = 1[s]  
Noe\_time = 1[s]  
Phase\_preset = 3[us]  
Recvr\_gain = 30  
Relaxation\_delay = 2[s]  
Temp\_get = 27.2[dC]  
Unblank\_time = 2[us]

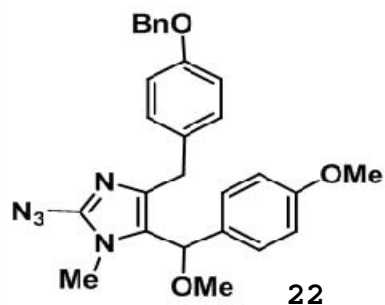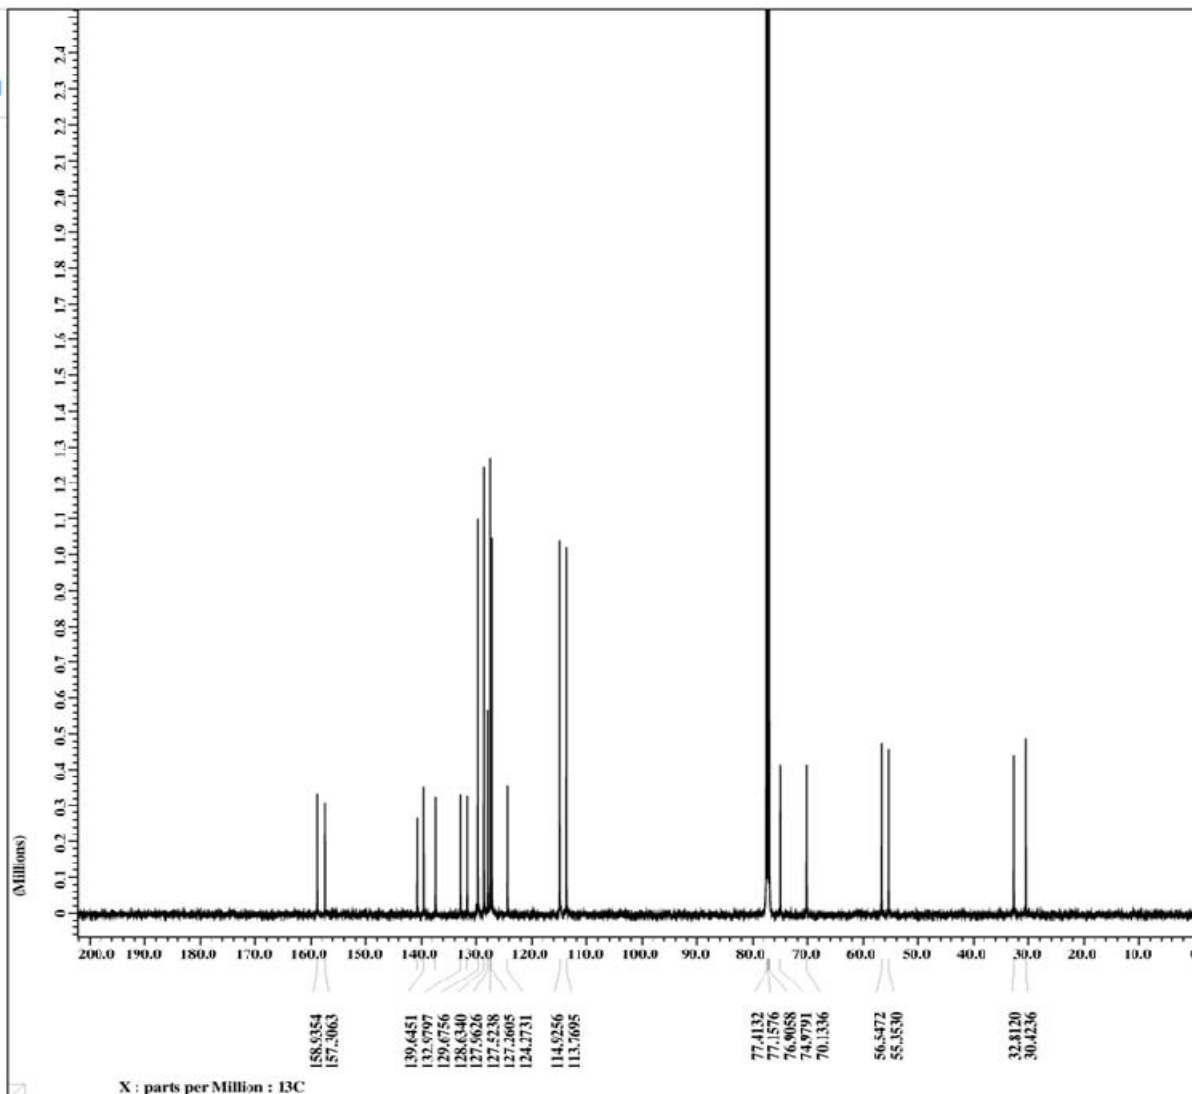

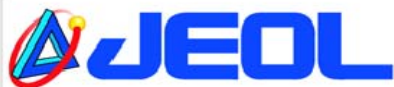

```

Filename      = IV_p_118_i_pre-epi-Ca
Author       = delta
Experiment   = single_pulse.exp
Sample_id    = S#386213
Solvent      = CHLOROFORM-D
Creation_time = 16-JUL-2008 17:38:24
Revision_time = 24-JUL-2008 15:27:50
Current_time  = 24-JUL-2008 15:28:48

Comment      = Single Pulse Experime
Data_format  = 1D COMPLEX
Dim_size     = 16384
Dim_title    = 1H
Dim_units    = [ppm]
Dimensions   = X
Site         = Eclipse+ 500
Spectrometer = DELTA_NMR

Field_strength = 11.7473579[T] (500[MH
X_acq_duration = 2.1823488[s]
X_domain       = 1H
X_freq        = 500.15991521[MHz]
X_offset      = 5[ppm]
X_points      = 16384
X_prescans    = 0
X_resolution  = 0.45822189[Hz]
X_sweep       = 7.50750751[kHz]
Clipped       = FALSE
Mod_return    = 1
Scans         = 12
Total_scans   = 12

X_90_width    = 18.5[us]
X_acq_time    = 2.1823488[s]
X_angle       = 45[deg]
X_pulse       = 9.25[us]
Initial_wait  = 1[s]
Phase_preset  = 3[us]
Recvr_gain    = 15
Relaxation_delay = 4[s]
Temp_get      = 25.1[dc]
Unblank_time  = 2[us]
  
```

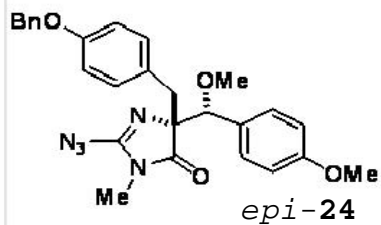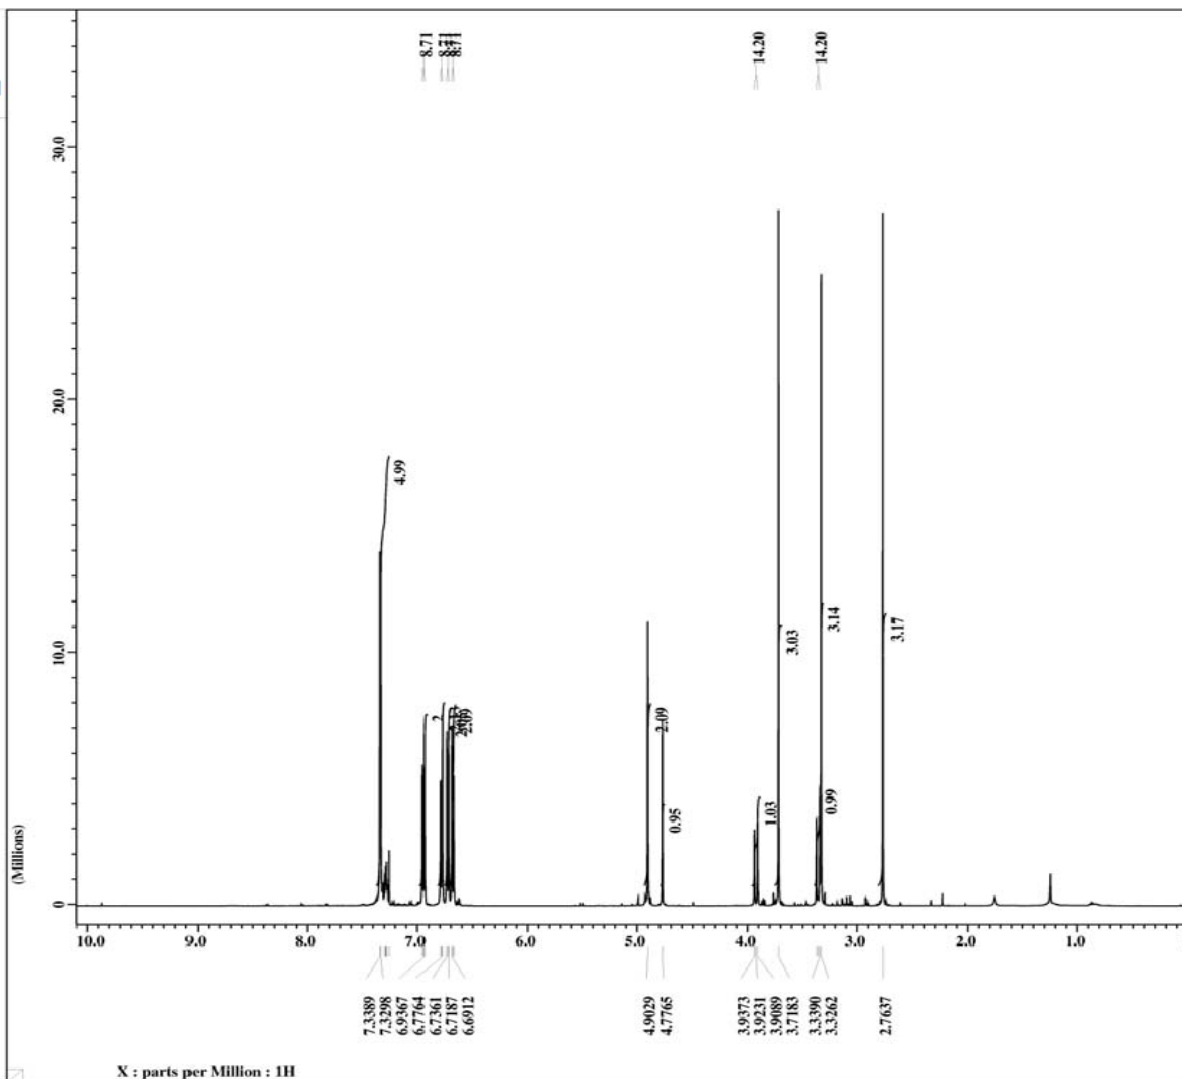

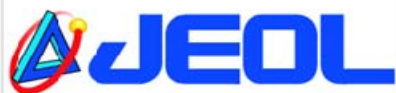

```

Filename      = IV_p_031_PTIC1-3.jdf
Author       = delta
Experiment   = single_pulse_dec
Sample_id    = S#727414
Solvent      = CHLOROFORM-D
Creation_time = 20-MAY-2008 23:24:57
Revision_time = 7-JUL-2008 17:30:22
Current_time  = 7-JUL-2008 17:31:02

Comment      = single pulse decouple
Data_format  = 1D COMPLEX
Dim_size     = 52428
Dim_title    = 13C
Dim_units    = [ppm]
Dimensions   = X
Site         = ECX 300
Spectrometer = DELTA2_NMR

Field_strength = 7.0586013[T] (300[MHz]
X_acq_duration = 2.75824064[s]
X_domain       = 13C
X_freq         = 75.56823426[MHz]
X_offset       = 100[ppm]
X_points       = 65536
X_prescans     = 4
X_resolution   = 0.35124027[Hz]
X_sweep        = 23.57424242[kHz]
Irr_domain     = 1H
Irr_freq       = 300.52965592[MHz]
Irr_offset     = 5[ppm]
Clipped       = FALSE
Mod_status    = 10
Scans          = 2260
Total_scans   = 2260

X_90_width    = 9.75[us]
X_acq_time    = 2.75824064[s]
X_angle       = 30[deg]
X_atn         = 0[db]
X_pulse       = 3.25[us]
Irr_atn_dec   = 25[db]
Irr_atn_noe   = 25[db]
Irr_noise     = WALTZ
Decoupling    = TRUE
Initial_wait  = 1[s]
Noe           = TRUE
Noe_time      = 2[s]
Recvr_gain    = 50
Relaxation_delay = 2[s]
Repetition_time = 4.75824064[s]
Temp_get      = 23.3[degC]
  
```

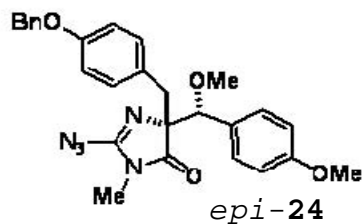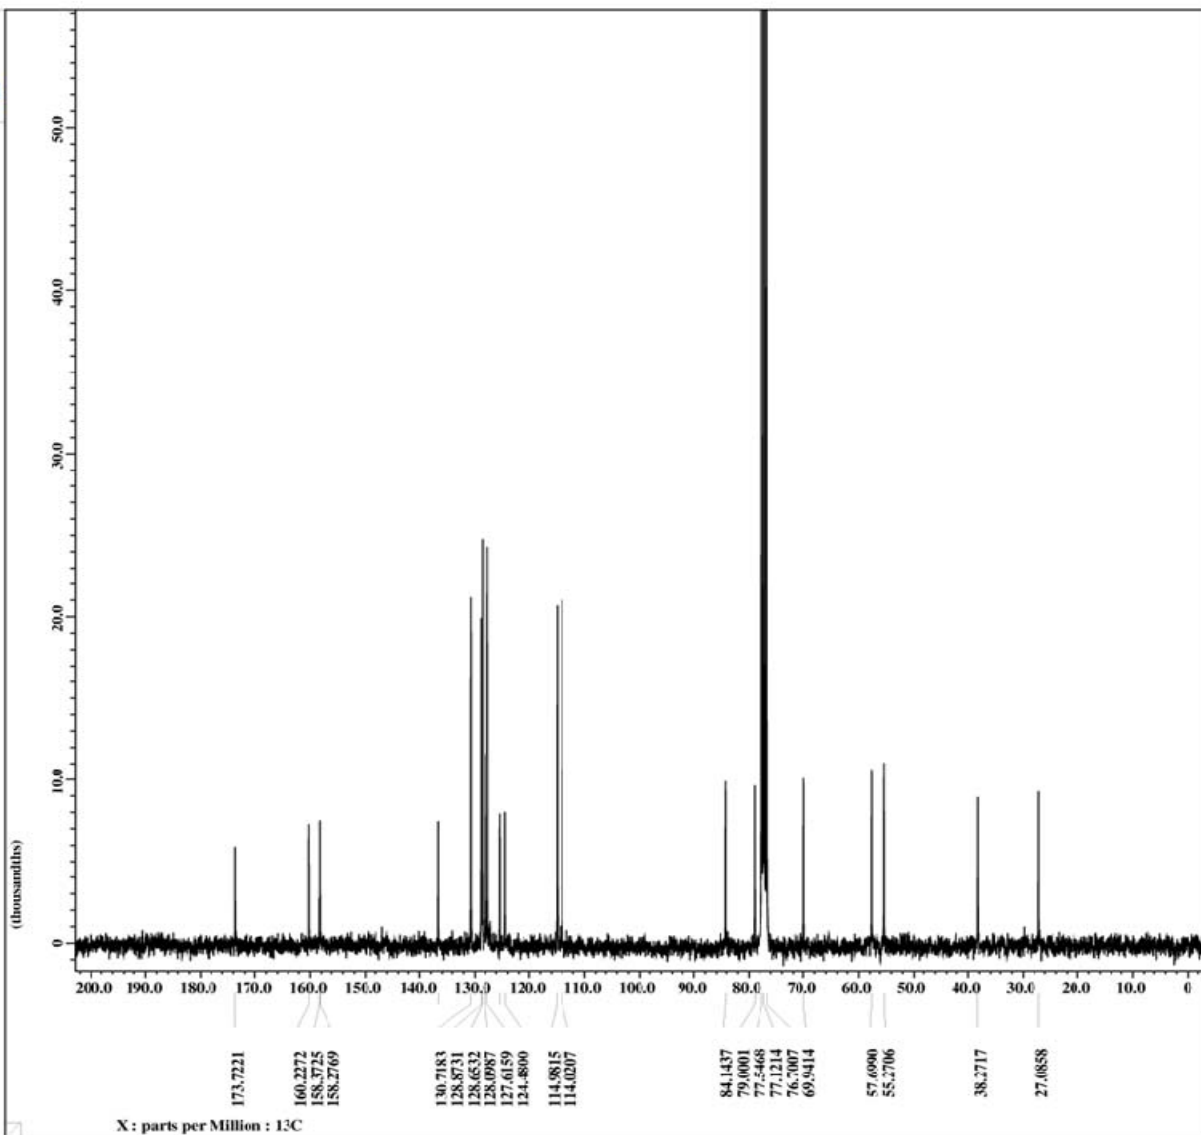

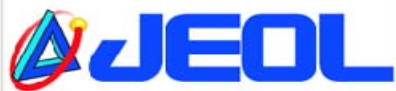

```

Filename      = IV_p_118_ii_pre-Calca
Author       = delta
Experiment   = single_pulse.exp
Sample_id    = S#322103
Solvent      = CHLOROFORM-D
Creation_time = 16-JUL-2003 17:31:35
Revision_time = 24-JUL-2003 15:34:14
Current_time  = 24-JUL-2003 15:34:44

Comment      = Single Pulse Experime
Data_format  = 1D COMPLEX
Dim_size     = 16384
Dim_title    = 1H
Dim_units    = [ppm]
Dimensions   = X
Site         = Eclipse+ 500
Spectrometer = DELTA_NMR

Field_strength = 11.7473579[T] (500)MH
X_acq_duration = 2.1823488[s]
X_domain       = 1H
X_freq         = 500.15991521[MHz]
X_offset       = 5[ppm]
X_points       = 16384
X_prescans     = 0
X_resolution   = 0.45822189[Hz]
X_sweep        = 7.50750751[kHz]
Clipped        = FALSE
Mod_return     = 1
Scans          = 12
Total_scans   = 12

X_90_width    = 10.5[us]
X_acq_time     = 2.1823488[s]
X_angle        = 45[deg]
X_pulse        = 9.25[us]
Initial_wait   = 1[s]
Phase_preset   = 3[us]
Recovr_gain    = 15
Relaxation_delay = 4[s]
Temp_get       = 24.9[degC]
Unblank_time   = 2[us]
  
```

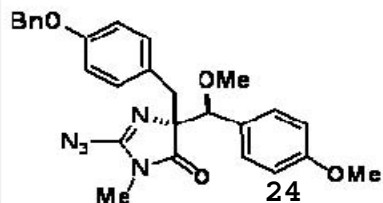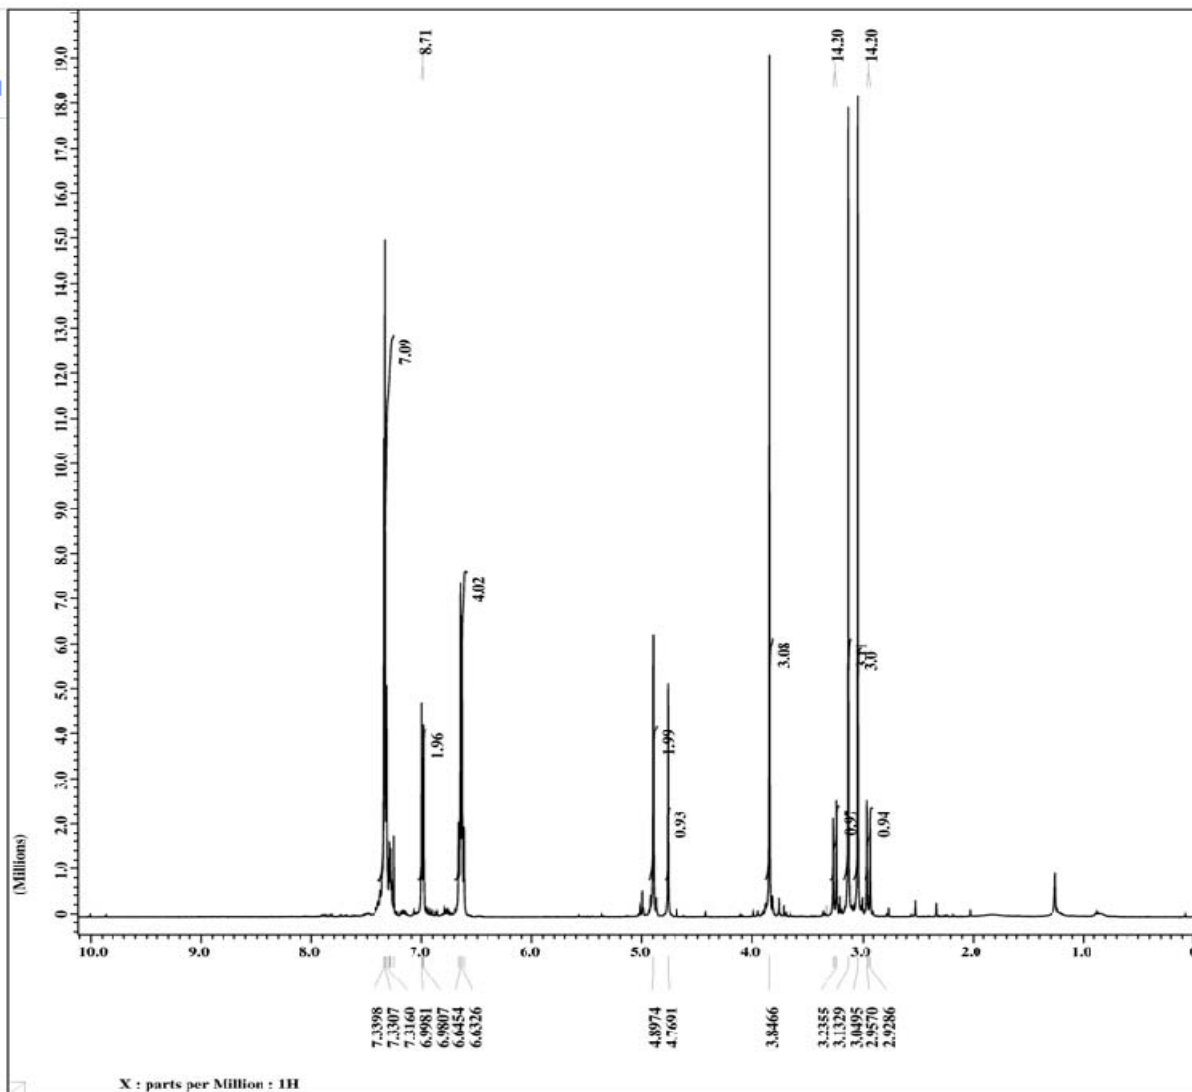

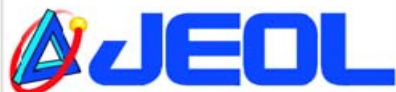

Filename = IV\_p\_031\_PTLC2-2.jdf  
 Author = delta  
 Experiment = single\_pulse\_dec  
 Sample\_id = panduka  
 Solvent = CHLOROFORM-D  
 Creation\_time = 21-MAY-2008 04:47:56  
 Revision\_time = 7-JUL-2008 17:40:07  
 Current\_time = 7-JUL-2008 17:40:42

Comment = single pulse decouple  
 Data\_format = 1D COMPLEX  
 Dim\_size = 52428  
 Dim\_title = 13C  
 Dim\_units = [ppm]  
 Dimensions = X  
 Site = ECX 300  
 Spectrometer = DELTA2\_NMR

Field strength = 7.0586013[T] (300[MHz])  
 X\_acq\_duration = 2.76824064[s]  
 X\_domain = 13C  
 X\_freq = 75.56823426[MHz]  
 X\_offset = 100[ppm]  
 X\_points = 65536  
 X\_prescans = 4  
 X\_resolution = 0.36124027[Hz]  
 X\_sweep = 23.67424242[kHz]  
 Irr\_domain = 1H  
 Irr\_freq = 300.52965592[MHz]  
 Irr\_offset = 5[ppm]  
 Clipped = FALSE  
 Mod\_return = 10  
 Scans = 4000  
 Total\_scans = 4000

X\_90\_width = 9.75[us]  
 X\_acq\_time = 2.76824064[s]  
 X\_angle = 30[deg]  
 X\_atn = 8[db]  
 X\_pulse = 3.25[us]  
 Irr\_atn\_dec = 25[db]  
 Irr\_atn\_noe = 25[db]  
 Irr\_noise = WALTZ  
 Decoupling = TRUE  
 Initial\_wait = 1[s]  
 Noe = TRUE  
 Noe\_time = 2[s]  
 Recvr\_gain = 50  
 Relaxation\_delay = 2[s]  
 Repetition\_time = 4.76824064[s]  
 Temp\_get = 23.1[dC]

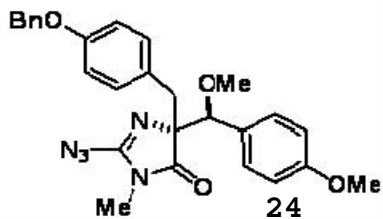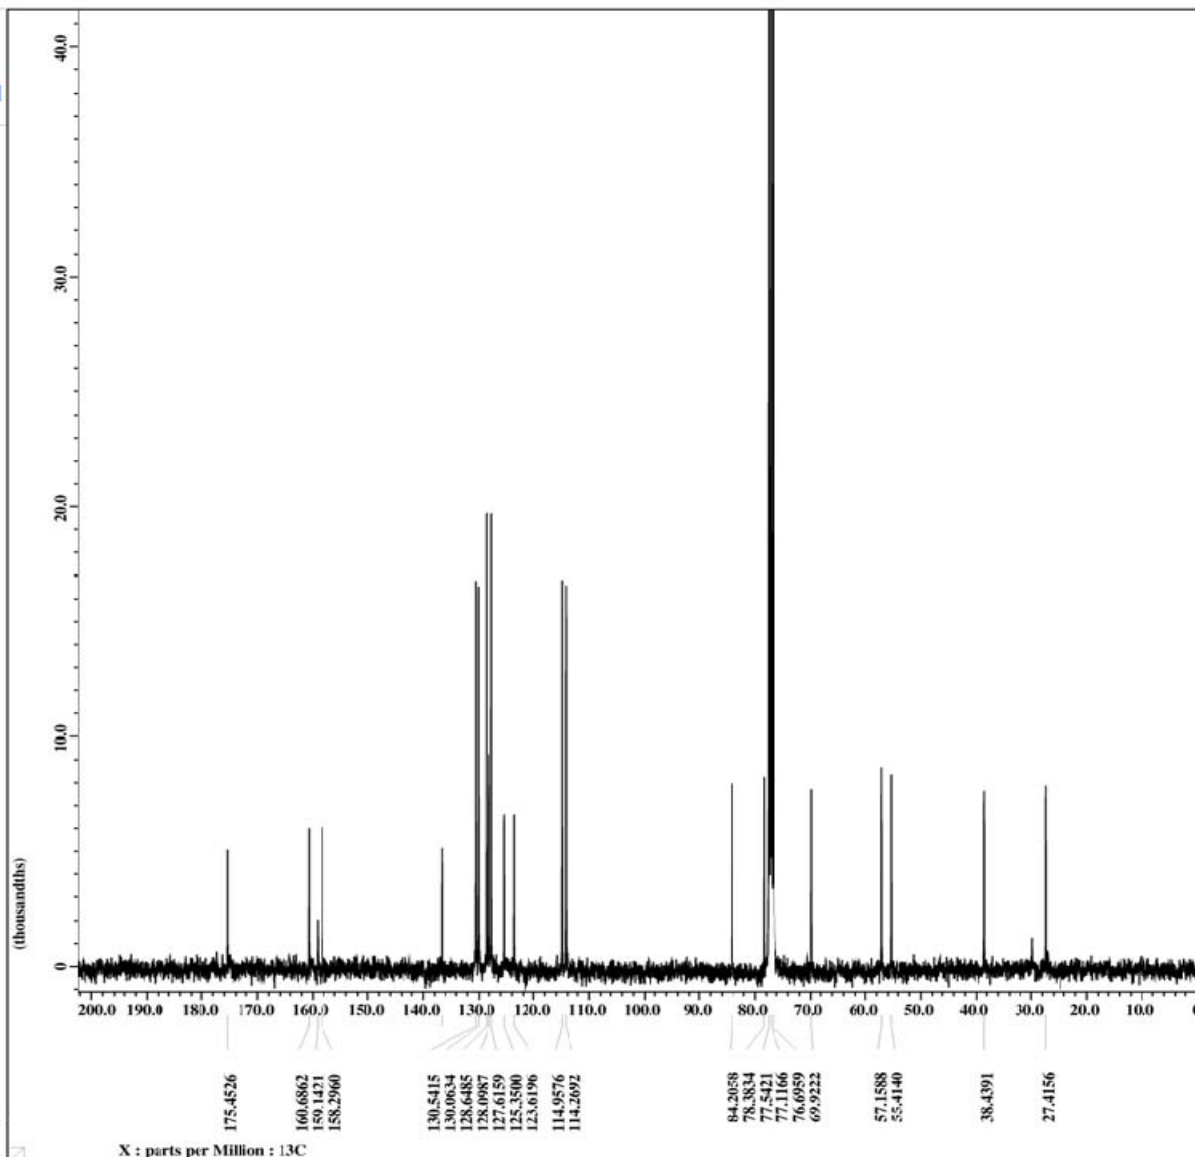

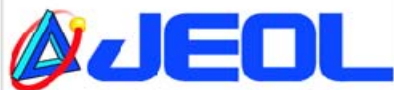

Filename = IV\_p\_129\_epi-Calcarid  
 Author = delta  
 Experiment = single\_pulse.exp  
 Sample\_id = 24607146  
 Solvent = METHANOL-D3  
 Creation\_time = 21-JUL-2008 23:56:17  
 Revision\_time = 24-JUL-2008 15:38:37  
 Current\_time = 24-JUL-2008 15:35:06

Comment = Single Pulse Experime  
 Data\_format = 1D\_COMPLEX  
 Dim\_size = 16384  
 Dim\_title = 1H  
 Dim\_units = [ppm]  
 Dimensions = X  
 Site = Eclipse+ 500  
 Spectrometer = DELTA\_NMR

Field\_strength = 11.7473519[T] (500[MH  
 K\_acq\_duration = 2.1823486[s]  
 K\_domain = 1H  
 K\_freq = 500.15991521[MHz]  
 K\_offset = 5[ppm]  
 K\_points = 16384  
 K\_prescans = 0  
 K\_resolution = 0.45822169[Hz]  
 K\_sweep = 7.50750751[kHz]  
 Clipped = FALSE  
 Mod\_return = 1  
 Scans = 12  
 Total\_scans = 12

X\_90\_width = 18.5[us]  
 X\_acq\_time = 2.1823486[s]  
 X\_angle = 45[deg]  
 X\_pulse = 5.25[us]  
 Initial\_wait = 1[s]  
 Phase\_preset = 3[us]  
 Recvr\_gain = 15  
 Relaxation\_delay = 4[s]  
 Temp\_get = 24.8[dC]  
 Unblank\_time = 2[us]

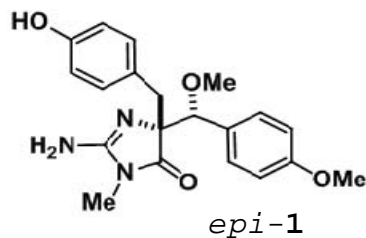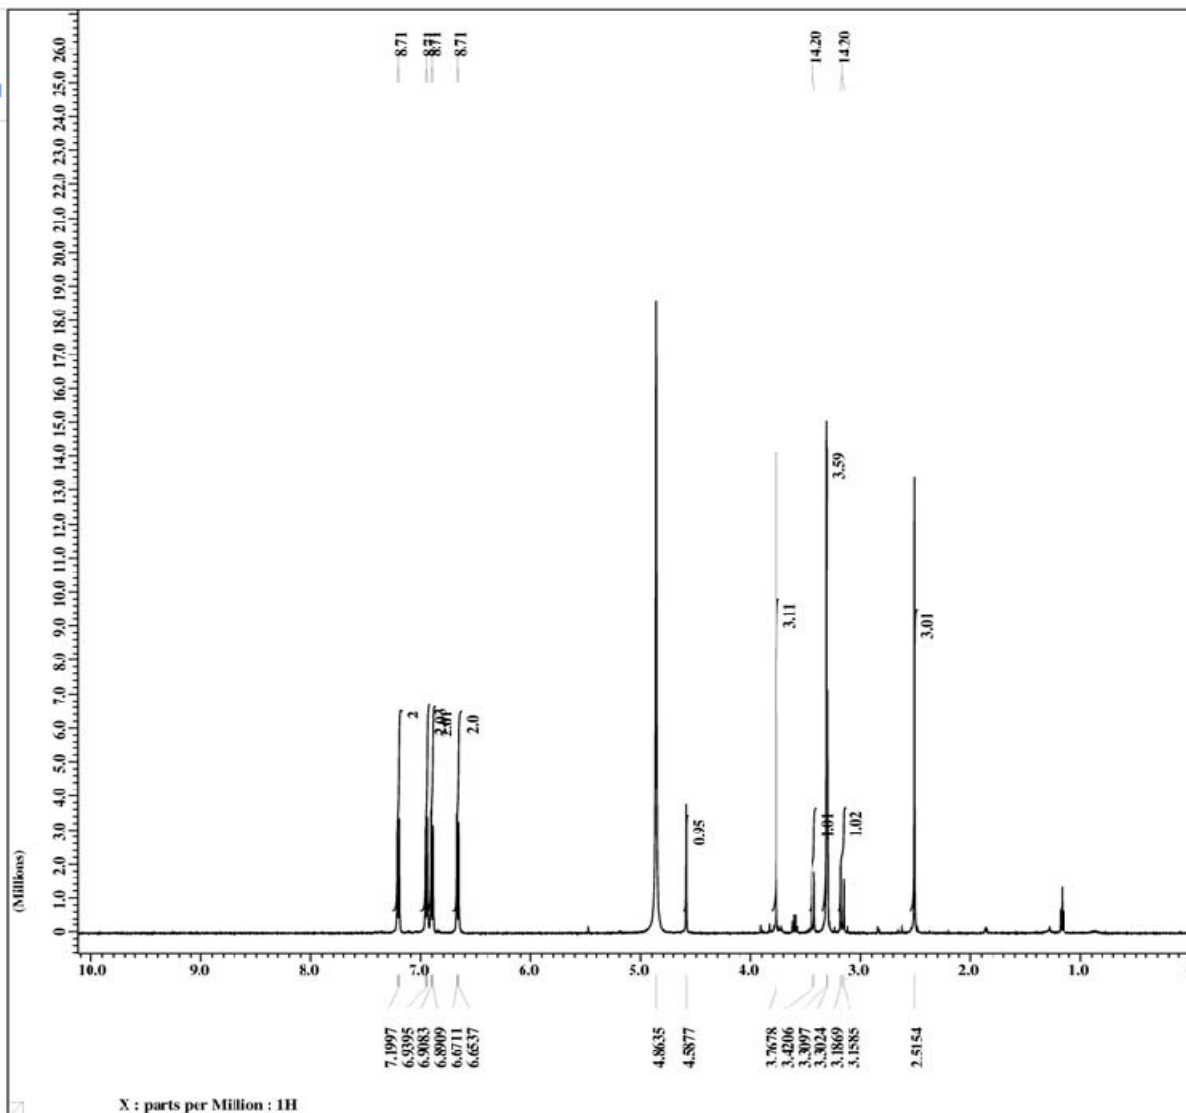

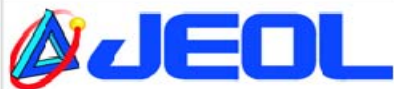

Filename = IV\_p\_129\_epi-Calcarid  
Author = delta  
Experiment = single\_pulse\_dec  
Sample\_id = S#761824  
Solvent = METHANOL-D3  
Creation\_time = 22-JUL-2008 14:00:39  
Revision\_time = 24-JUL-2008 15:41:59  
Current\_time = 24-JUL-2008 15:42:36

Comment = single pulse decouple  
Data\_format = 1D COMPLEX  
Dim\_size = 65536  
Dim\_title = 13C  
Dim\_units = [ppm]  
Dimensions = X  
Site = Eclipse+ 500  
Spectrometer = DELTA\_NMR

Field\_strength = 11.7473579[T] (500[MH  
X\_acq\_duration = 2.0640448[s]  
X\_domain = 13C  
X\_freq = 125.76529768[MHz]  
X\_offset = 100[ppm]  
X\_points = 65536  
X\_prescans = 4  
X\_resolution = 0.47983613[Hz]  
X\_sweep = 31.44654088[kHz]  
Irr\_domain = 1H  
Irr\_freq = 500.15991521[MHz]  
Irr\_offset = 5[ppm]  
Clipped = FALSE  
Mod\_return = 1  
Scans = 7000  
Total\_scans = 7000

X\_90\_width = 14.2[us]  
X\_acq\_time = 2.0640448[s]  
X\_angle = 30[deg]  
X\_pulse = 4.75333333[us]  
Initial\_wait = 1[s]  
Noe\_time = 1[s]  
Phase\_prese: = 3[us]  
Recvr\_gain = 30  
Relaxation\_delay = 2[s]  
Temp\_get = 27.1[dC]  
Unblank\_time = 2[us]

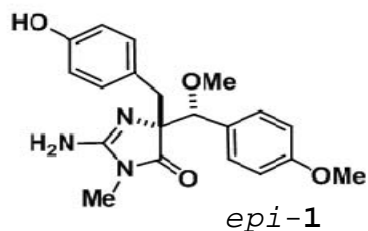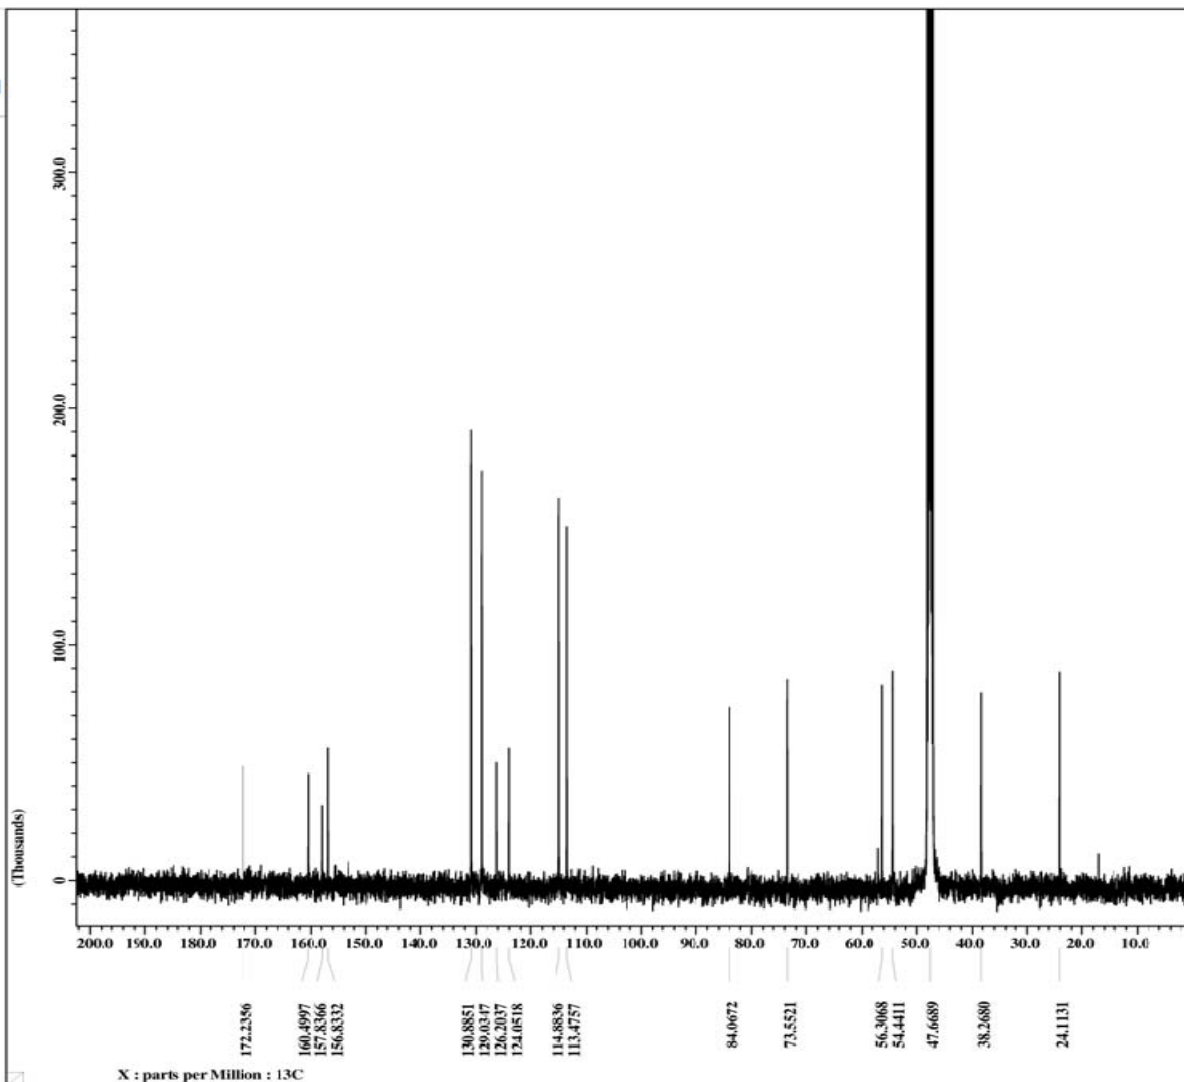

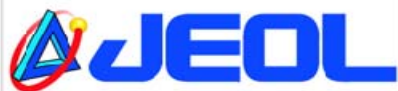

Filename = IV\_p\_126\_Calcaridine  
Author = delta  
Experiment = single pulse.exp  
Sample\_id = S1807030  
Solvent = METHANOL-D3  
Creation\_time = 18-JUL-2008 05:20:52  
Revision\_time = 24-JUL-2008 15:49:34  
Current\_time = 24-JUL-2008 15:49:54  
  
Comment = Single Pulse Experine  
Data\_format = 1D COMPLEX  
Dim\_size = 16394  
Dim\_title = 1H  
Dim\_units = [ppm]  
Dimensions = X  
Site = Eclipse+ 500  
Spectrometer = DELTA\_NMR  
  
Field\_strength = 11.7473579[T] (500[MH  
X\_acq\_duration = 2.1823488[s]  
K\_domain = 1H  
X\_freq = 500.15991521[MHz]  
X\_offset = 5[ppm]  
X\_points = 16384  
X\_prescans = 0  
X\_resolution = 0.45822189[Hz]  
X\_sweep = 7.50750751[kHz]  
Clipped = FALSE  
Mod\_return = 1  
Scaus = 12  
Total\_scans = 12  
  
X\_90\_width = 13.5[us]  
X\_acq\_time = 2.1823488[a]  
X\_angle = 45[deg]  
X\_pulse = 9.25[us]  
Initial\_wait = 1[s]  
Phase\_preset = 3[us]  
Recvr\_gain = 17  
Relaxation\_delay = 4[s]  
Temp\_get = 24.9[°C]  
Unblank\_time = 2[us]

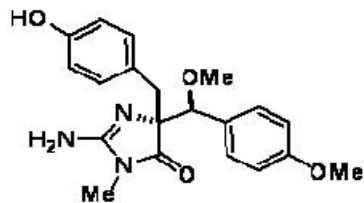

Calcaridine (1)

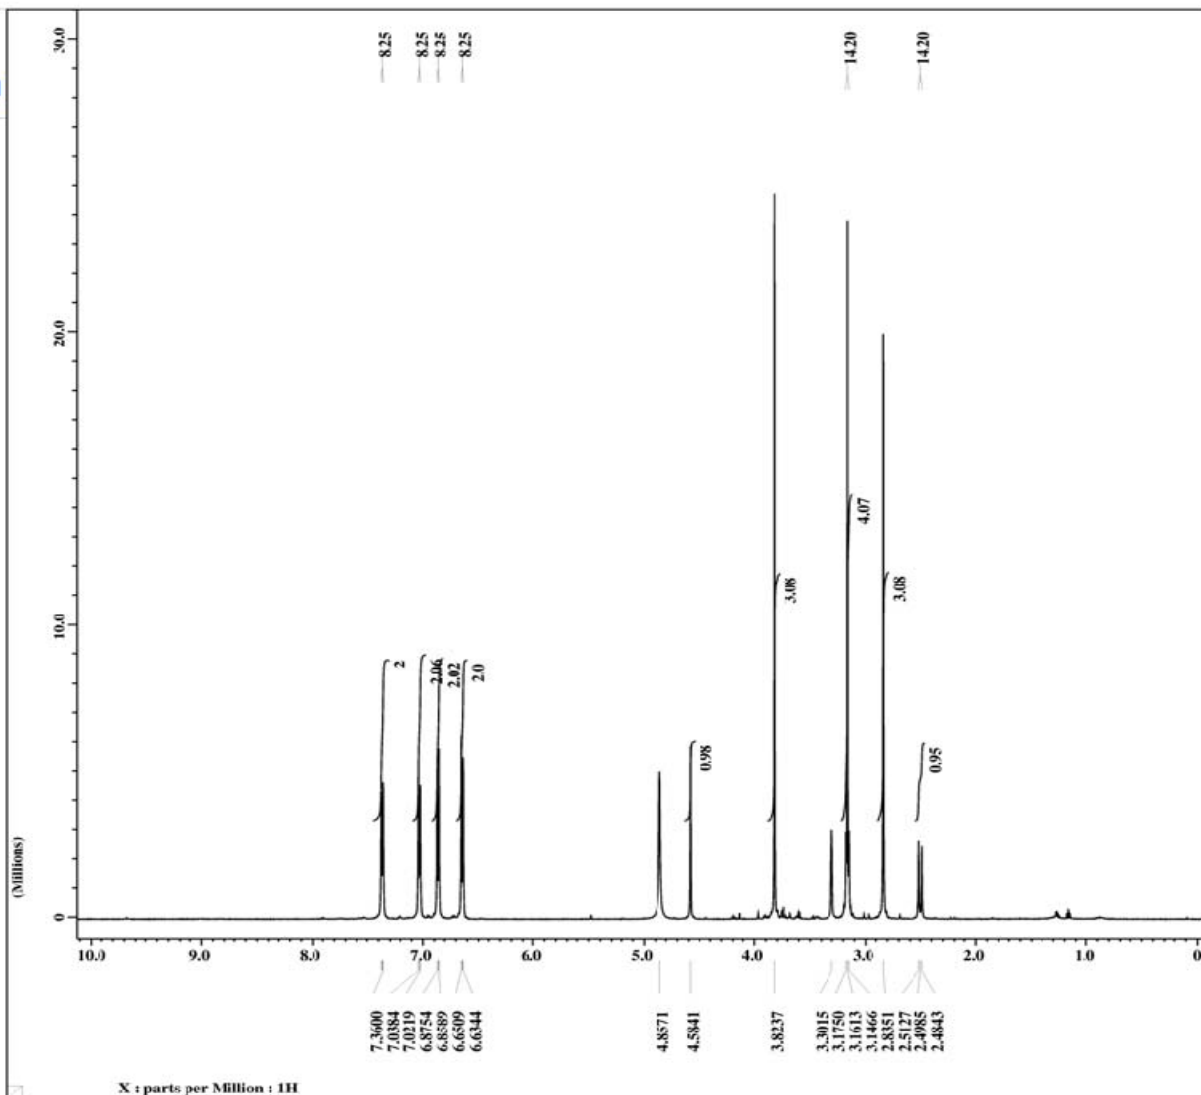



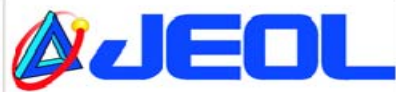

Filename = IV\_p\_126\_Calcaridine  
Author = delta  
Experiment = single\_pulse\_dec  
Sample\_id = S#808080  
Solvent = METHANOL-D3  
Creation\_time = 18-JUL-2008 14:25:12  
Revision\_time = 18-JUL-2008 08:16:33  
Current\_time = 24-JUL-2008 15:44:58

Comment = single pulse decouple  
Data\_format = 1D COMPLEX  
Dim\_size = 65536  
Dim\_title = 13C  
Dim\_units = [ppm]  
Dimensions = X  
Site = Eclipse+ 500  
Spectrometer = DELTA\_NMR

Field\_strength = 11.7473579[T] (500[MH  
X\_acq\_duration = 2.0840448[s]  
X\_domain = 13C  
X\_freq = 125.76529768[MHz]  
X\_offset = 100[ppm]  
X\_points = 65536  
X\_prescans = 4  
X\_resolution = 0.47983613[Hz]  
X\_sweep = 31.44654088[kHz]  
Irr\_domain = 1H  
Irr\_freq = 500.15991521[MHz]  
Irr\_offset = 5[ppm]  
Clipped = FALSE  
Mod\_return = 1  
Scans = 6400  
Total\_scans = 6400

X\_90\_width = 14.2[us]  
X\_acq\_time = 2.0840448[s]  
X\_angle = 30[deg]  
X\_pulse = 4.73333333[us]  
Initial\_wait = 1[s]  
Noe\_time = 1[s]  
Phase\_preset = 3[us]  
Recvr\_gain = 30  
Relaxation\_delay = 2[s]  
Temp\_get = 27.4[dC]  
Unblank\_time = 2[us]

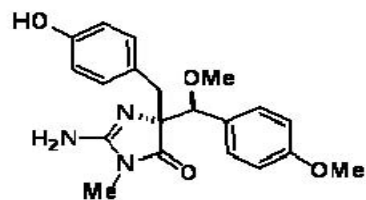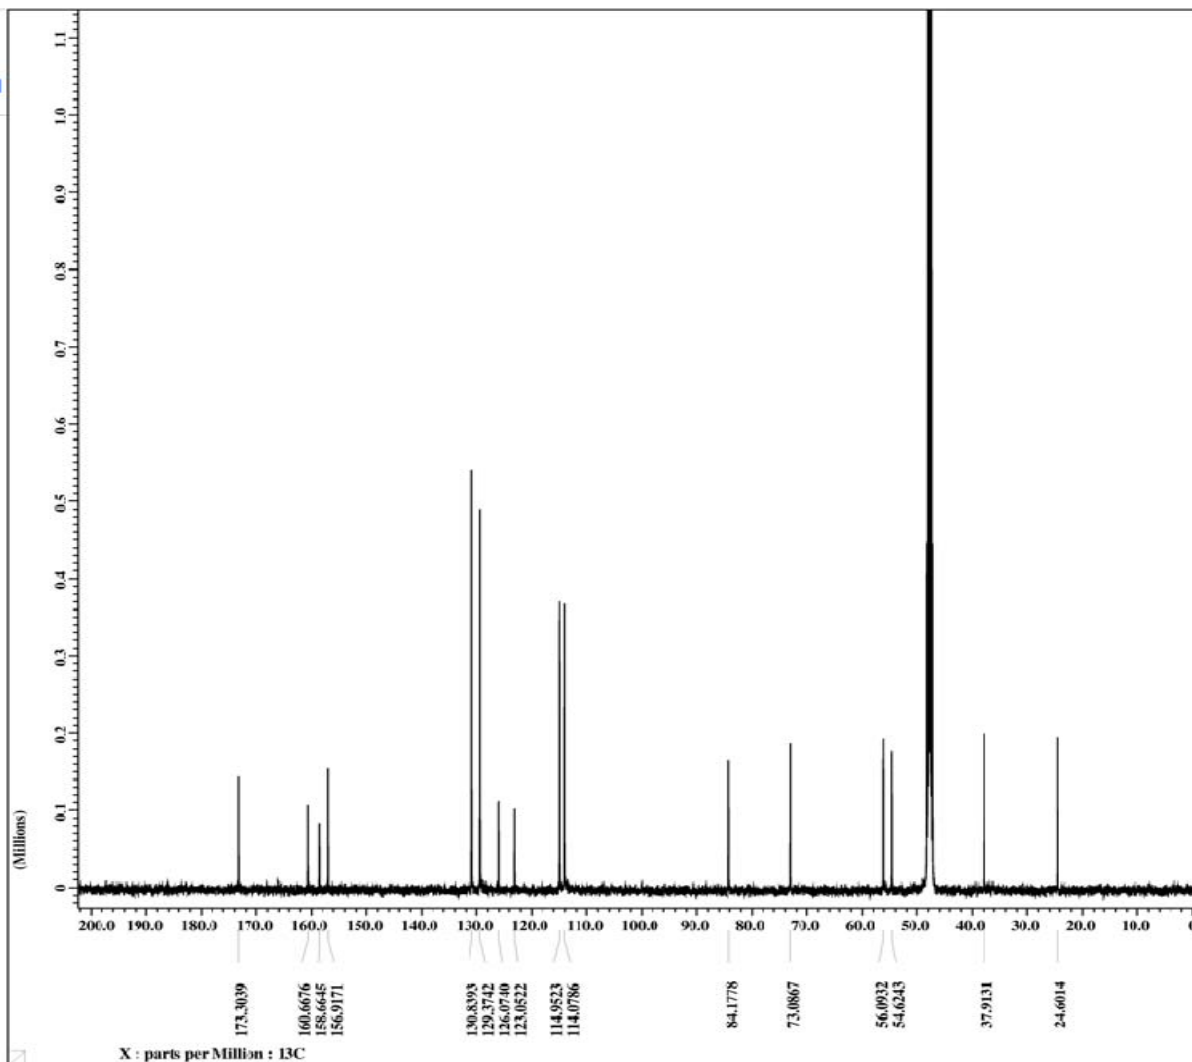

Calcaridine (1)
